# Supplementary material for: Synthesis of 3,4-dihydroisoquinolin-1(2H)-one derivatives and their antioomycete activity against the phytopathogen Pythium recalcitrans
Source: Royal Society of Chemistry journal article supplement (doi:10.1039/d3ra00855j), 2023-01-01
Supplement: d3ra00855j1.pdf [file d3ra00855j1.pdf]

## Supporting Information

Synthesis of 3,4-dihydroisoquinolin-1(2*H*)-one derivatives and their antioomycete activity against the phytopathogen *Pythium recalcitrans*

Delong Wang<sup>#</sup>, Min Li<sup>#</sup>, Jing Li, Yali Fang<sup>\*</sup> and Zhijia Zhang<sup>\*</sup>

Department of Pharmaceutical Engineering, College of Plant Protection, Shanxi Key Laboratory of Integrated Pest Management in Agriculture, Shanxi Agricultural University, Taiyuan 030031, China

<sup>#</sup> These authors contributed equally to this work and share the first authorship.

<sup>\*</sup> Correspondence: fang\_august@163.com (Y. F.) and Zhang770504@126.com (Z. Z.)

### Contents:

1. X-ray diffraction data for compound **I6** (**Table S1**).....Page **S1**
2. The relative configuration ratios of the synthesized target compounds in the present study (**Table S2**).....Page **S2**
3. Experimental and predicted activities of compounds **I1–I34**, **II1–II20** and **III1–III5** for the 3D-QSAR models (**Table S3**).....Page **S3**
4. *In vivo* control efficacy of compound **I23** against *Pythium recalcitrans* on *Nicotiana benthamiana* seedlings in pot experiment (**Table S4**).....Page **S4**
5. The results of molecular superposition based on the common backbone of the most potent compound **I23** (**Figure S1**).....Page **S5**
6. The representative photos of the inhibition effect of compounds **I23** and hymexazol on the mycelial growth of *Pythium recalcitrans* at different concentrations (**Figure S2**).....Page **S5**
7. The correlation plots of the experimental versus predicted activities (pEC<sub>50</sub> values) of training and test set based on the CoMFA (**a**) and CoMSIA (**b**) models (**Figure S3**).....Page **S6**
8. Effect of **I23** on cell membrane permeability of *P. recalcitrans* (**Figure S4**).....Page **S6**
9. Comparison between the mean levels of the different lipid classes with the contents higher than 1% (**Figure S5**).....Page **S7**
10. The distribution of the chain lengths and degrees of unsaturation of lipid classes Cer, PI and PC (**Figure S6**).....Page **S8**
11. The <sup>1</sup>H and <sup>13</sup>C NMR spectra of compounds **I1–I34**, **II1–II20** and **III1–III5**.....Pages **S9–S68**

**Table S1.** X-ray diffraction data for compound **I6** (CCDC Deposition No. 2180985)

| Compound <b>I6</b>                                         |                                                                                                                                     |
|------------------------------------------------------------|-------------------------------------------------------------------------------------------------------------------------------------|
| Chemical formula                                           | C <sub>21</sub> H <sub>17</sub> NO <sub>4</sub>                                                                                     |
| Chemical formula weight                                    | 347.36                                                                                                                              |
| Temperature (K)                                            | 120.01(10)                                                                                                                          |
| Wavelength                                                 | 1.54184 Å                                                                                                                           |
| Crystal system                                             | monoclinic                                                                                                                          |
| Space group                                                | <i>P</i> 1 2 <sub>1</sub> / <i>n</i> 1                                                                                              |
| Unit cell dimension                                        | <i>a</i> =8.61550(10) Å, <i>b</i> =13.21640(10) Å, <i>c</i> =15.09880(10) Å<br><i>α</i> =90°, <i>β</i> =99.6980(10)°, <i>γ</i> =90° |
| Volume (Å <sup>3</sup> )                                   | 1694.67(3)                                                                                                                          |
| <i>Z</i>                                                   | 4                                                                                                                                   |
| Calculated density (g/cm <sup>3</sup> )                    | 1.361                                                                                                                               |
| Radiation type                                             | Cu <i>Kα</i>                                                                                                                        |
| Absorpt coefficient (mm <sup>-1</sup> )                    | 0.776                                                                                                                               |
| Crystal description                                        | colourless block                                                                                                                    |
| Crystal size (mm)                                          | 0.3 × 0.2 × 0.1                                                                                                                     |
| Diffractometer                                             | XtaLAB Synergy R, HyPix                                                                                                             |
| Absorpt correction type                                    | multi-scan                                                                                                                          |
| <i>T</i> <sub>max</sub>                                    | 1.00000                                                                                                                             |
| <i>T</i> <sub>min</sub>                                    | 0.87479                                                                                                                             |
| Theta range for data collection                            | 4.474° to 67.684°                                                                                                                   |
| <i>F</i> (000)                                             | 728                                                                                                                                 |
| Limiting indices                                           | -10 ≤ <i>h</i> ≤ 10, -15 ≤ <i>k</i> ≤ 16, -18 ≤ <i>l</i> ≤ 17                                                                       |
| Reflection number/cell                                     | 16914/14765                                                                                                                         |
| measurement reflection used                                |                                                                                                                                     |
| <i>R</i> <sub>int</sub> , <i>R</i> <sub>sigma</sub>        | 0.0151, 0.0087                                                                                                                      |
| Refinement method                                          | Full-matrix                                                                                                                         |
| No. of refinement reflections                              | 3424                                                                                                                                |
| No. of reflections ( <i>I</i> > 2σ( <i>I</i> ))            | 3340                                                                                                                                |
| No. of parameters                                          | 236                                                                                                                                 |
| No. of restraints                                          | 0                                                                                                                                   |
| H-atom treatment                                           | H-atom parameters constrained                                                                                                       |
| Goodness-of-fit on <i>F</i> <sup>2</sup>                   | 1.041                                                                                                                               |
| <i>R</i> indices (all data)                                | <i>R</i> <sub>1</sub> = 0.0388, <i>wR</i> <sub>2</sub> = 0.1000                                                                     |
| Final <i>R</i> indices ( <i>I</i> > 2σ( <i>I</i> ))        | <i>R</i> <sub>1</sub> = 0.0380, <i>wR</i> <sub>2</sub> = 0.0995                                                                     |
| Extinction method                                          | none                                                                                                                                |
| Δρ <sub>max</sub> , Δρ <sub>min</sub> (e Å <sup>-3</sup> ) | 0.304, -0.252                                                                                                                       |

**Table S2.** The relative configuration ratios of the synthesized target compounds in the present study

| Compd. | <i>trans/cis</i> ratio   | Compd. | <i>trans/cis</i> ratio |
|--------|--------------------------|--------|------------------------|
| I1     | 1:0 ( <i>trans</i> only) | I31    | 0:1                    |
| I2     | 1:0                      | I32    | 0:1                    |
| I3     | 1:0                      | I33    | 0:1                    |
| I4     | 0:1 ( <i>cis</i> only)   | I34    | 0:1                    |
| I5     | 1:0                      | II1    | 0:1                    |
| I6     | 1:0                      | II2    | 0:1                    |
| I7     | 1:0                      | II3    | 0:1                    |
| I8     | 1:0                      | II4    | 1:6.3                  |
| I9     | 5.6:1                    | II5    | 0:1                    |
| I10    | 1:0                      | II6    | 1:9                    |
| I11    | 1:0                      | II7    | 0:1                    |
| I12    | 1:0                      | II8    | 0:1                    |
| I13    | 1:0                      | II9    | 1:3.1                  |
| I14    | 1:0                      | II10   | 1:6.3                  |
| I15    | 0:1                      | II11   | 0:1                    |
| I16    | 0:1                      | II12   | 1:0                    |
| I17    | 0:1                      | II13   | 1:7.1                  |
| I18    | 0:1                      | II14   | 0:1                    |
| I19    | 0:1                      | II15   | 0:1                    |
| I20    | 0:1                      | II16   | 0:1                    |
| I21    | 0:1                      | II17   | 1:5.3                  |
| I22    | 1:0                      | II18   | 0:1                    |
| I23    | 0:1                      | II19   | 1:4.8                  |
| I24    | 0:1                      | II20   | 1:3.2                  |
| I25    | 1:6.6                    | III1   | 1:0                    |
| I26    | 0:1                      | III2   | 1:0                    |
| I27    | 0:1                      | III3   | 1:0                    |
| I28    | 0:1                      | III4   | 1:0                    |
| I29    | 0:1                      | III5   | 1:0                    |
| I30    | 0:1                      |        |                        |

**Table S3.** Experimental and predicted activities of compounds **I1–I34**, **II1–II20** and **III1–III5** for the 3D-QSAR models

| Compd.      | EC <sub>50</sub><br>(× 10 <sup>-3</sup> mM) | Actual<br>pEC <sub>50</sub> | CoMFA      |          | CoMSIA     |          |
|-------------|---------------------------------------------|-----------------------------|------------|----------|------------|----------|
|             |                                             |                             | Predicated | Residual | Predicated | Residual |
| <b>I1*</b>  | 46.6                                        | 1.332                       | 1.311      | -0.021   | 1.340      | 0.008    |
| <b>I2</b>   | 45.8                                        | 1.339                       | 1.359      | 0.020    | 1.335      | -0.004   |
| <b>I3*</b>  | 29.5                                        | 1.530                       | 1.405      | -0.125   | 1.412      | -0.118   |
| <b>I4</b>   | 45.4                                        | 1.343                       | 1.362      | 0.019    | 1.357      | 0.014    |
| <b>I5</b>   | 53.7                                        | 1.270                       | 1.365      | 0.095    | 1.319      | 0.049    |
| <b>I6</b>   | 46.8                                        | 1.330                       | 1.178      | -0.152   | 1.238      | -0.092   |
| <b>I7</b>   | 43.6                                        | 1.360                       | 1.359      | -0.001   | 1.354      | -0.006   |
| <b>I8*</b>  | 59.8                                        | 1.223                       | 1.130      | -0.093   | 1.190      | -0.033   |
| <b>I9</b>   | 57.4                                        | 1.241                       | 1.406      | 0.165    | 1.380      | 0.139    |
| <b>I10</b>  | 54.0                                        | 1.268                       | 1.310      | 0.042    | 1.313      | 0.045    |
| <b>I11</b>  | 46.5                                        | 1.333                       | 1.315      | -0.018   | 1.320      | -0.013   |
| <b>I12</b>  | 67.8                                        | 1.169                       | 1.351      | 0.182    | 1.323      | 0.154    |
| <b>I13</b>  | 65.1                                        | 1.187                       | 1.292      | 0.105    | 1.308      | 0.121    |
| <b>I14*</b> | 40.6                                        | 1.392                       | 1.347      | -0.045   | 1.334      | -0.058   |
| <b>I15*</b> | 42.8                                        | 1.369                       | 1.585      | 0.216    | 1.531      | 0.162    |
| <b>I16</b>  | 20.9                                        | 1.681                       | 1.518      | -0.163   | 1.456      | -0.225   |
| <b>I17*</b> | 23.2                                        | 1.635                       | 1.643      | 0.008    | 1.578      | -0.057   |
| <b>I18</b>  | 25.1                                        | 1.601                       | 1.710      | 0.109    | 1.599      | -0.002   |
| <b>I19</b>  | 21.5                                        | 1.668                       | 1.653      | -0.015   | 1.581      | -0.087   |
| <b>I20</b>  | 23.2                                        | 1.635                       | 1.533      | -0.102   | 1.578      | -0.057   |
| <b>I21</b>  | 14.7                                        | 1.833                       | 1.593      | -0.240   | 1.620      | -0.213   |
| <b>I22</b>  | 20.8                                        | 1.682                       | 1.544      | -0.138   | 1.634      | -0.048   |
| <b>I23</b>  | 14.0                                        | 1.855                       | 1.537      | -0.318   | 1.54       | -0.315   |
| <b>I24</b>  | 38.9                                        | 1.411                       | 1.506      | 0.095    | 1.498      | 0.087    |
| <b>I25</b>  | 33.2                                        | 1.479                       | 1.566      | 0.087    | 1.543      | 0.064    |
| <b>I26</b>  | 29.6                                        | 1.528                       | 1.574      | 0.046    | 1.553      | 0.025    |
| <b>I27</b>  | 26.0                                        | 1.585                       | 1.592      | 0.007    | 1.569      | -0.016   |
| <b>I28</b>  | 29.4                                        | 1.532                       | 1.646      | 0.114    | 1.588      | 0.056    |
| <b>I29</b>  | 41.7                                        | 1.380                       | 1.351      | -0.029   | 1.368      | -0.012   |
| <b>I30*</b> | 26.0                                        | 1.585                       | 1.541      | -0.044   | 1.463      | -0.122   |
| <b>I31</b>  | 36.3                                        | 1.440                       | 1.465      | 0.025    | 1.418      | -0.022   |
| <b>I32</b>  | 26.9                                        | 1.570                       | 1.648      | 0.078    | 1.547      | -0.023   |
| <b>I33</b>  | 43.1                                        | 1.365                       | 1.399      | 0.034    | 1.513      | 0.148    |
| <b>I34</b>  | 40.9                                        | 1.389                       | 1.424      | 0.035    | 1.374      | -0.015   |
| <b>II1*</b> | 18.2                                        | 1.739                       | 1.636      | -0.103   | 1.609      | -0.13    |
| <b>II2</b>  | 27.7                                        | 1.558                       | 1.555      | -0.003   | 1.558      | 0        |
| <b>II3</b>  | 32.0                                        | 1.494                       | 1.552      | 0.058    | 1.578      | 0.084    |
| <b>II4</b>  | 38.5                                        | 1.415                       | 1.562      | 0.147    | 1.588      | 0.173    |
| <b>II5*</b> | 45.3                                        | 1.344                       | 1.472      | 0.128    | 1.515      | 0.171    |

|              |        |        |        |        |        |        |
|--------------|--------|--------|--------|--------|--------|--------|
| <b>II6</b>   | 43.0   | 1.366  | 1.430  | 0.064  | 1.400  | 0.034  |
| <b>II7</b>   | 31.5   | 1.502  | 1.472  | -0.030 | 1.540  | 0.038  |
| <b>II8</b>   | 47.1   | 1.327  | 1.424  | 0.097  | 1.477  | 0.150  |
| <b>II9</b>   | 31.3   | 1.504  | 1.473  | -0.031 | 1.523  | 0.019  |
| <b>II10</b>  | 41.3   | 1.384  | 1.502  | 0.118  | 1.534  | 0.150  |
| <b>II11</b>  | 16.9   | 1.773  | 1.615  | -0.158 | 1.613  | -0.160 |
| <b>II12*</b> | 35.8   | 1.446  | 1.529  | 0.083  | 1.567  | 0.121  |
| <b>II13</b>  | 29.6   | 1.529  | 1.511  | -0.018 | 1.500  | -0.029 |
| <b>II14</b>  | 47.8   | 1.321  | 1.366  | 0.045  | 1.434  | 0.113  |
| <b>II15*</b> | 31.3   | 1.505  | 1.397  | -0.108 | 1.391  | -0.114 |
| <b>II16*</b> | 48.7   | 1.313  | 1.287  | -0.026 | 1.444  | 0.131  |
| <b>II17</b>  | 30.3   | 1.519  | 1.573  | 0.054  | 1.548  | 0.029  |
| <b>II18</b>  | 33.1   | 1.480  | 1.511  | 0.031  | 1.523  | 0.043  |
| <b>II19*</b> | 32.2   | 1.492  | 1.514  | 0.022  | 1.509  | 0.017  |
| <b>II20</b>  | 34.0   | 1.469  | 1.506  | 0.037  | 1.523  | 0.054  |
| <b>III1</b>  | 951.4  | 0.022  | -0.185 | -0.207 | -0.094 | -0.116 |
| <b>III2</b>  | 1258.1 | -0.097 | 0.066  | 0.163  | 0.007  | 0.104  |
| <b>III3</b>  | 874.3  | 0.060  | 0.035  | -0.025 | -0.034 | -0.094 |
| <b>III4*</b> | 895.7  | 0.051  | 0.186  | 0.135  | 0.141  | 0.090  |
| <b>III5</b>  | 1055.2 | -0.021 | 0.174  | 0.195  | 0.132  | 0.153  |

\* The compounds were in the test set for external validation of the optimal 3D-QSAR models.

**Table S4.** *In vivo* control efficacy of compound **I23** against *Pythium recalcitrans* on *Nicotiana benthamiana* seedlings in pot experiment

| Compound   | Dose<br>(mg/pot) | Control efficacy (%) |                 |
|------------|------------------|----------------------|-----------------|
|            |                  | Preventive effect    | Curative effect |
| <b>I23</b> | 1.0              | 37.8 ± 10.7c         | 3.3 ± 2.9c      |
|            | 2.0              | 75.4 ± 12.6b         | 33.3 ± 12.6ab   |
|            | 5.0              | 96.5 ± 3.1a          | 55.0 ± 10.0a    |
| Hymexazol  | 2.0              | 63.9 ± 3.5b          | 21.7 ± 10.4b    |

The results were expressed as the mean ± SD of three independent replicates.

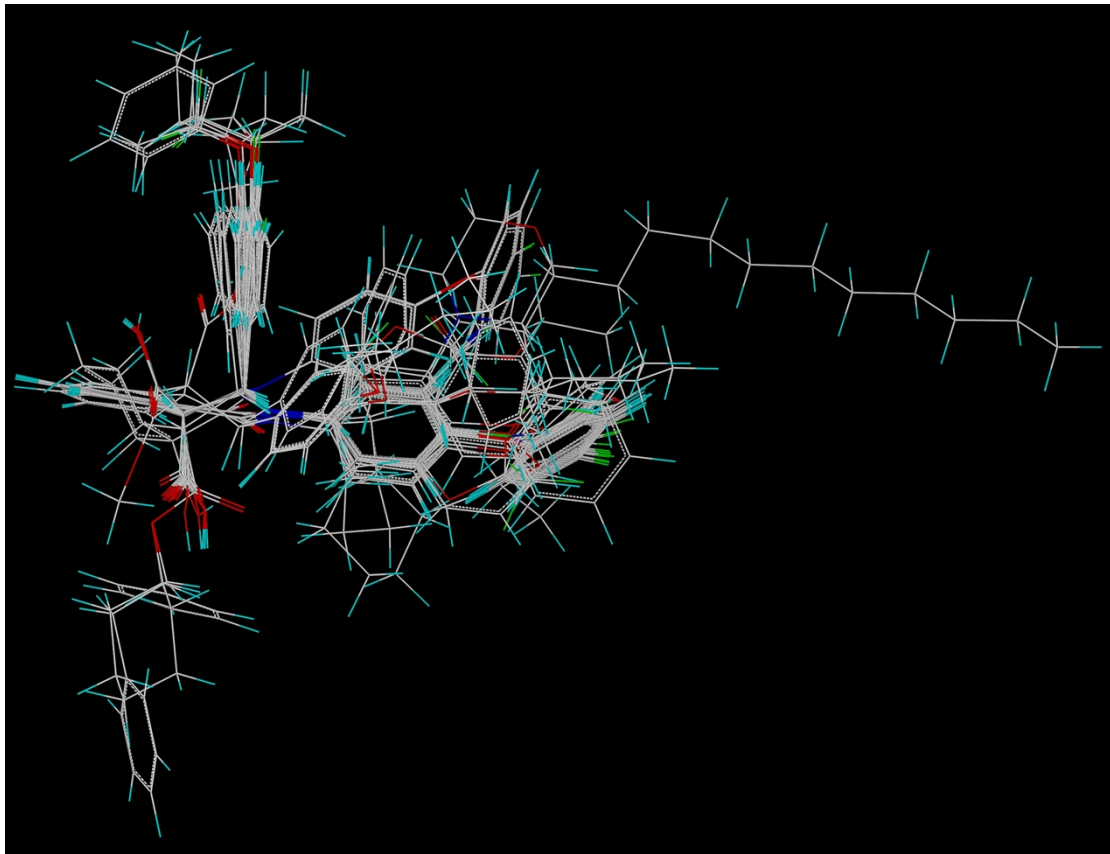

**Figure S1.** The results of molecular superposition based on the common backbone of the most potent compound **I23**.

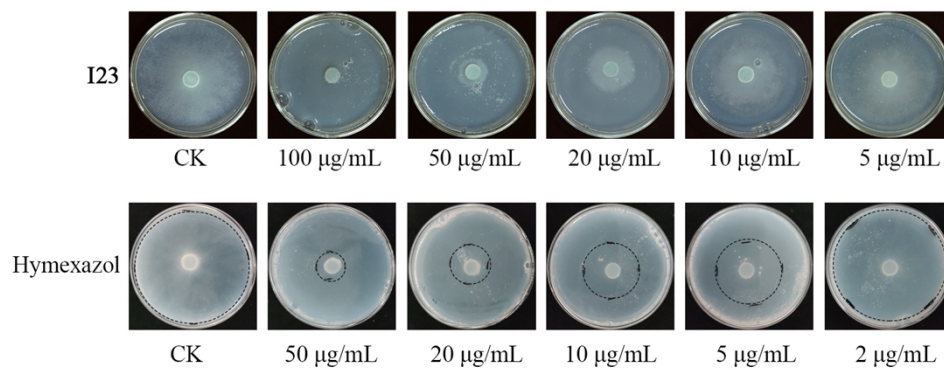

**Figure S2.** The representative photos of the inhibition effect of compounds **I23** and hymexazol on the mycelial growth of *Pythium recalcitrans* at different concentrations.

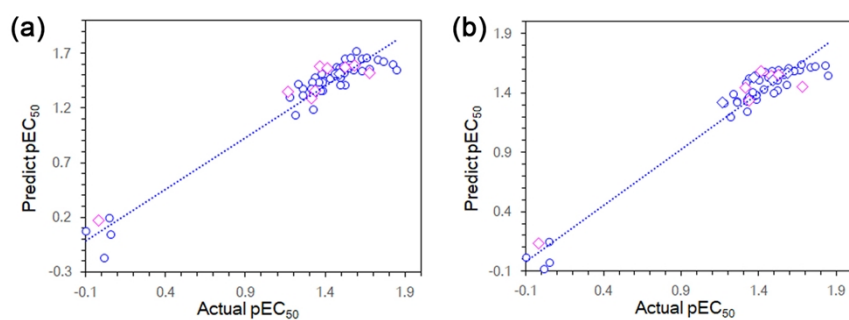

**Figure S3.** The correlation plots of the experimental versus predicted activities (pEC<sub>50</sub> values) of training (○) and test (\*) set based on the CoMFA (a) and CoMSIA (b) models.

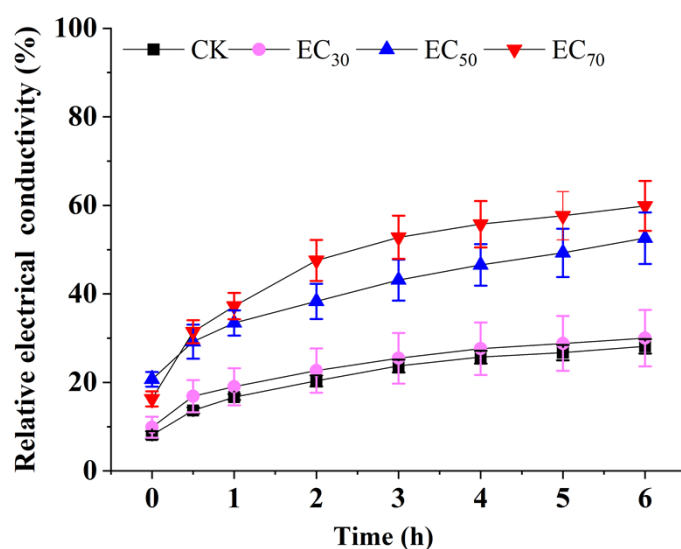

**Figure S4.** Effect of I23 on cell membrane permeability of *P. recalcitrans*.

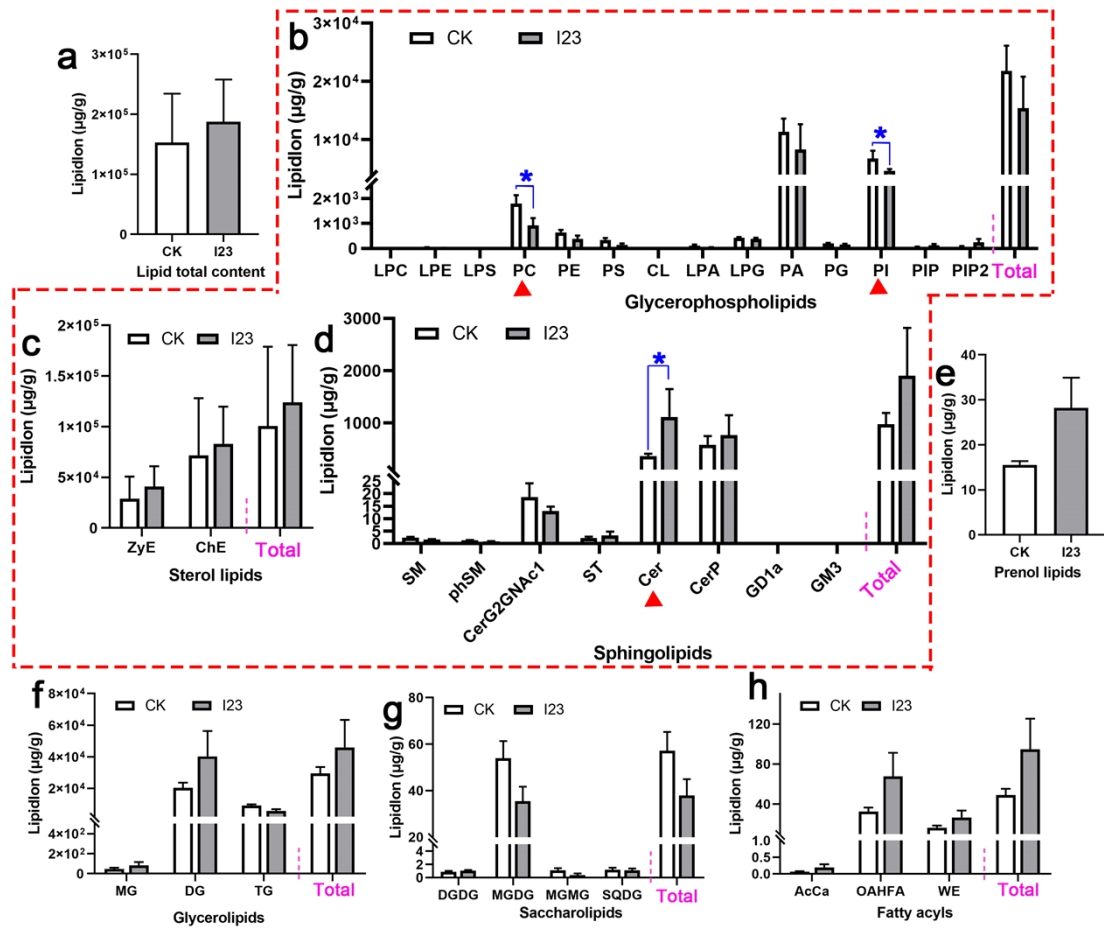

**Figure S5.** Comparison between the mean levels of the different lipid classes with the contents higher than 1%.



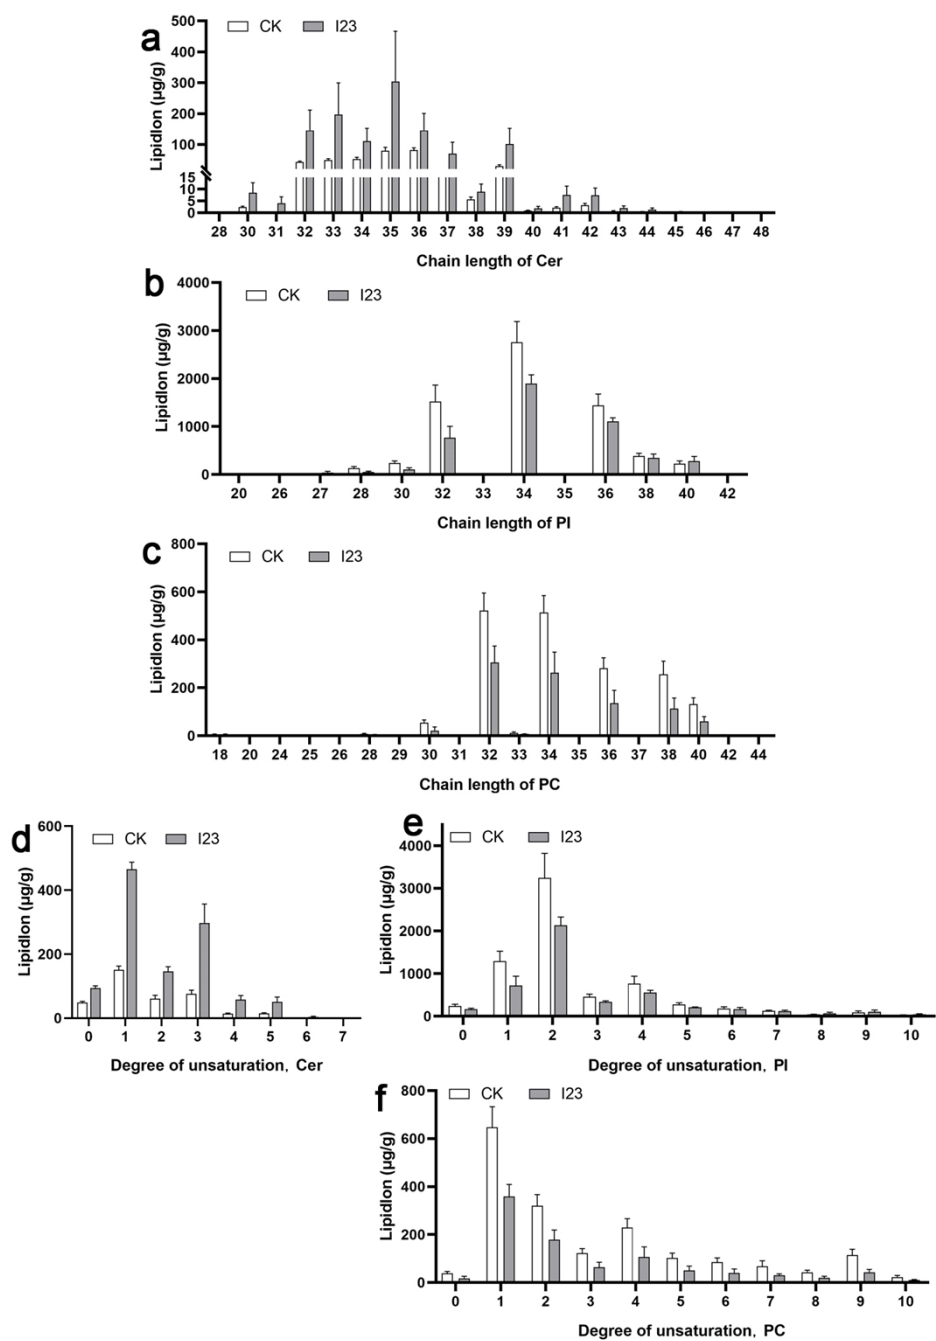

**Figure S6.** The distribution of the chain lengths and degrees of unsaturation of lipid classes Cer, PI and PC.

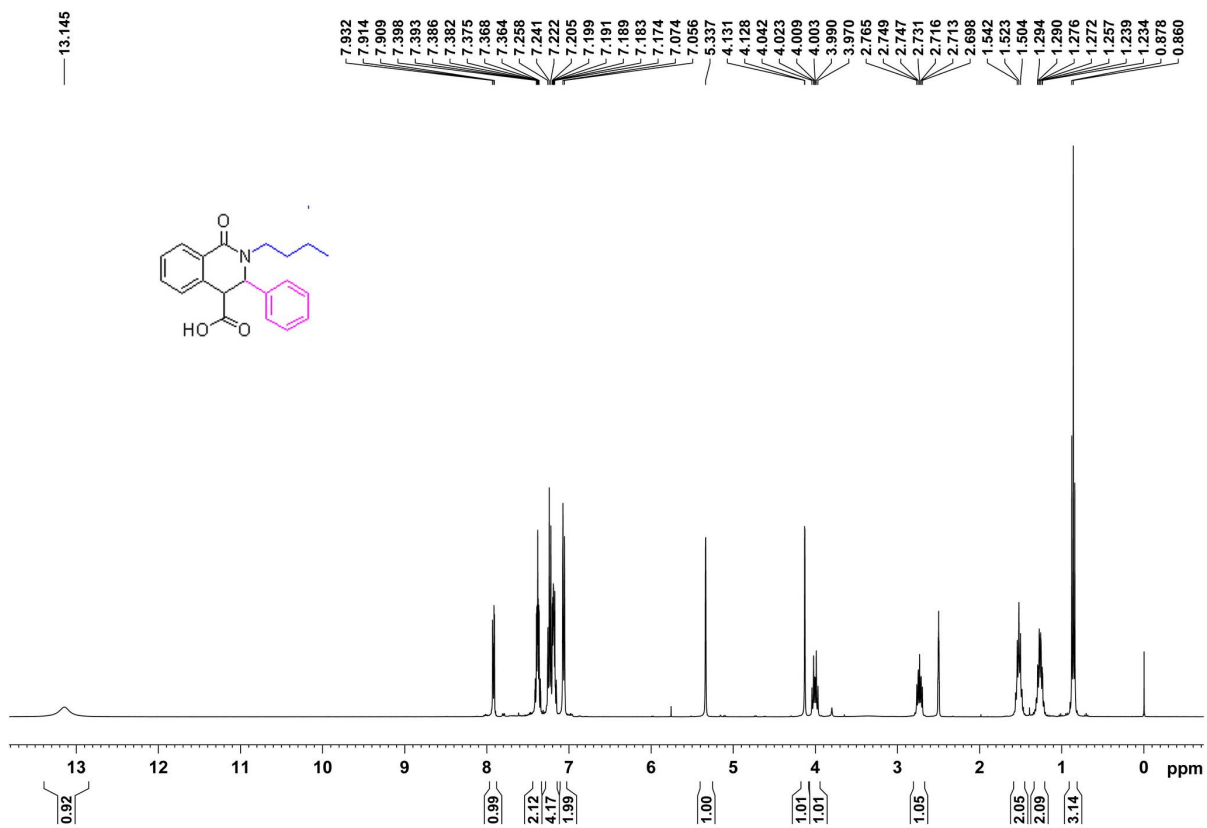

Figure S7. The  $^1\text{H}$  NMR spectrum of compound II

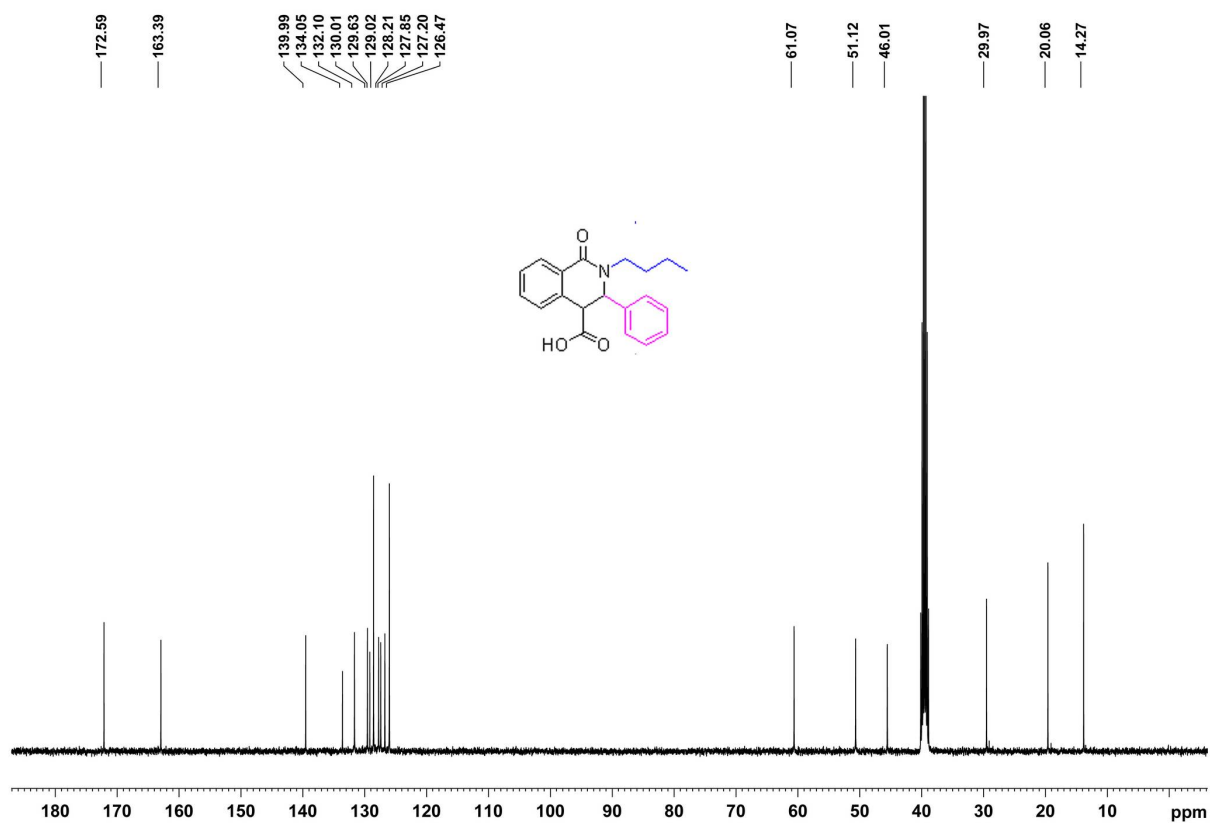

Figure S8. The  $^{13}\text{C}$  NMR spectrum of compound II

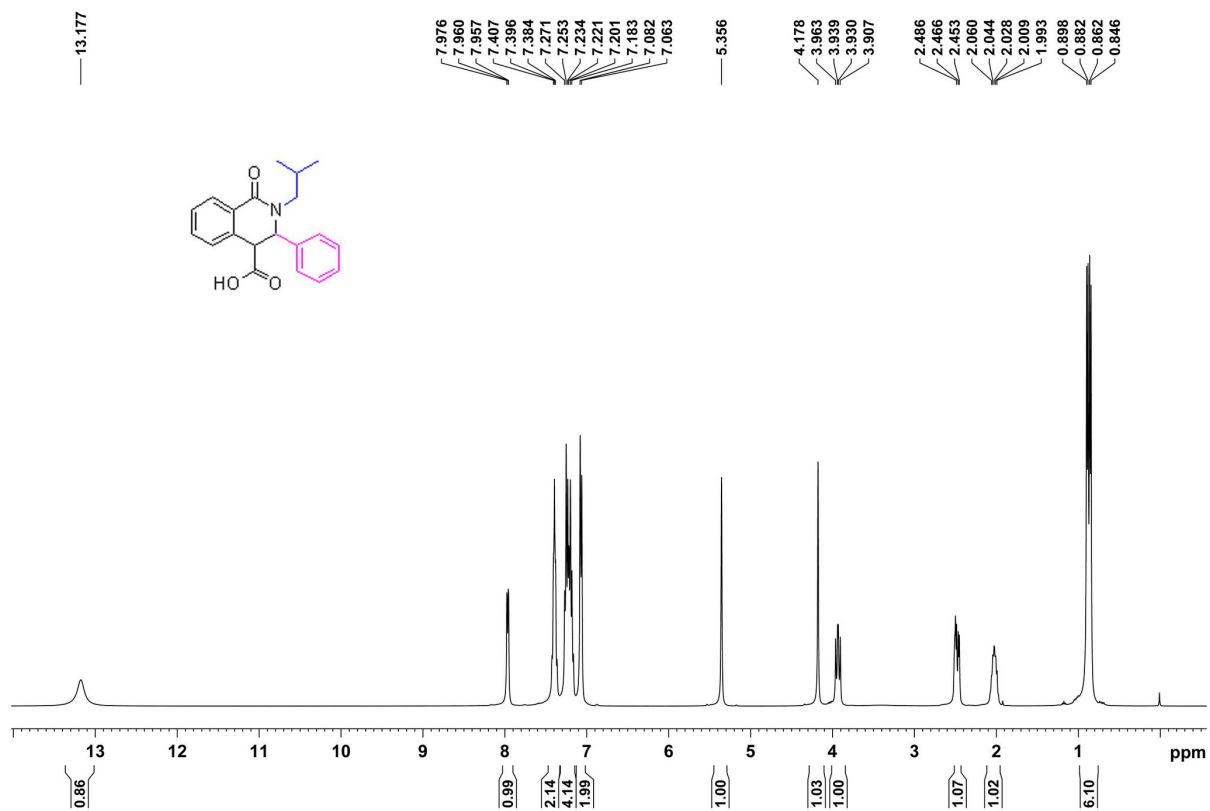

Figure S9. The <sup>1</sup>H NMR spectrum of compound I2

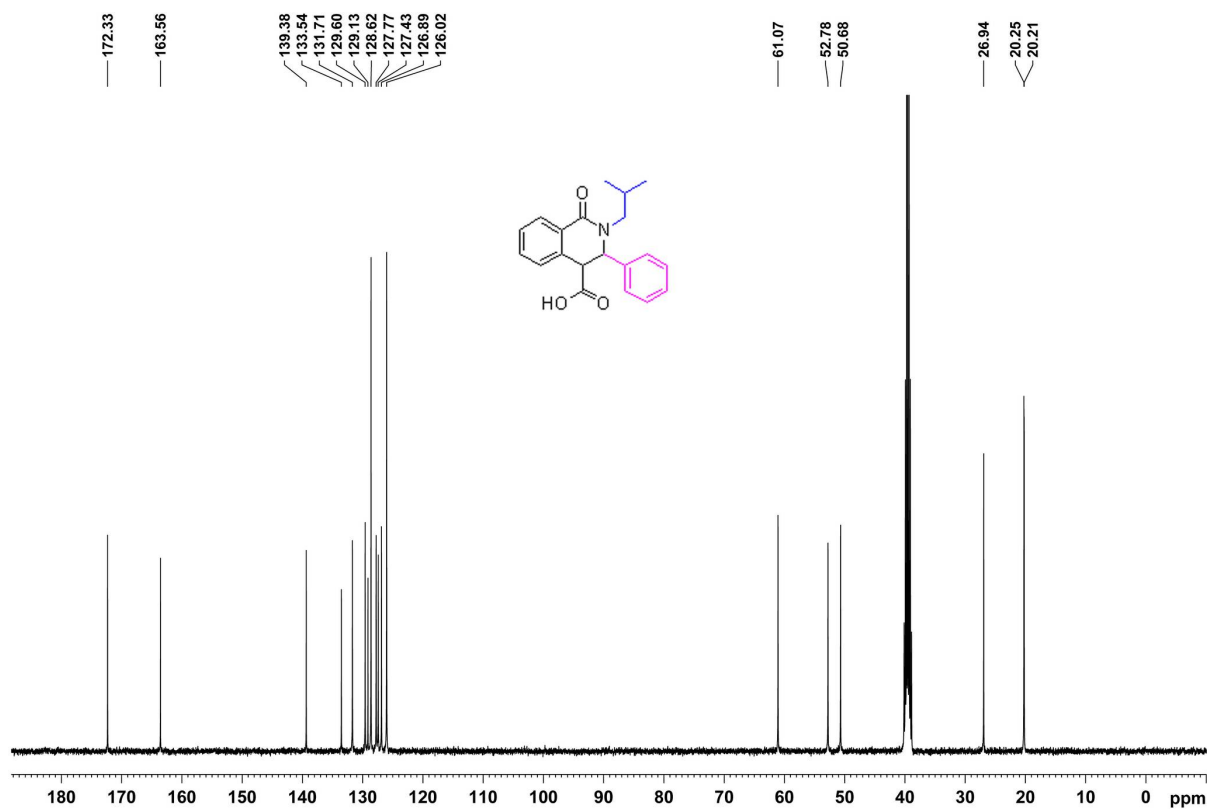

Figure S10. The <sup>13</sup>C NMR spectrum of compound I2

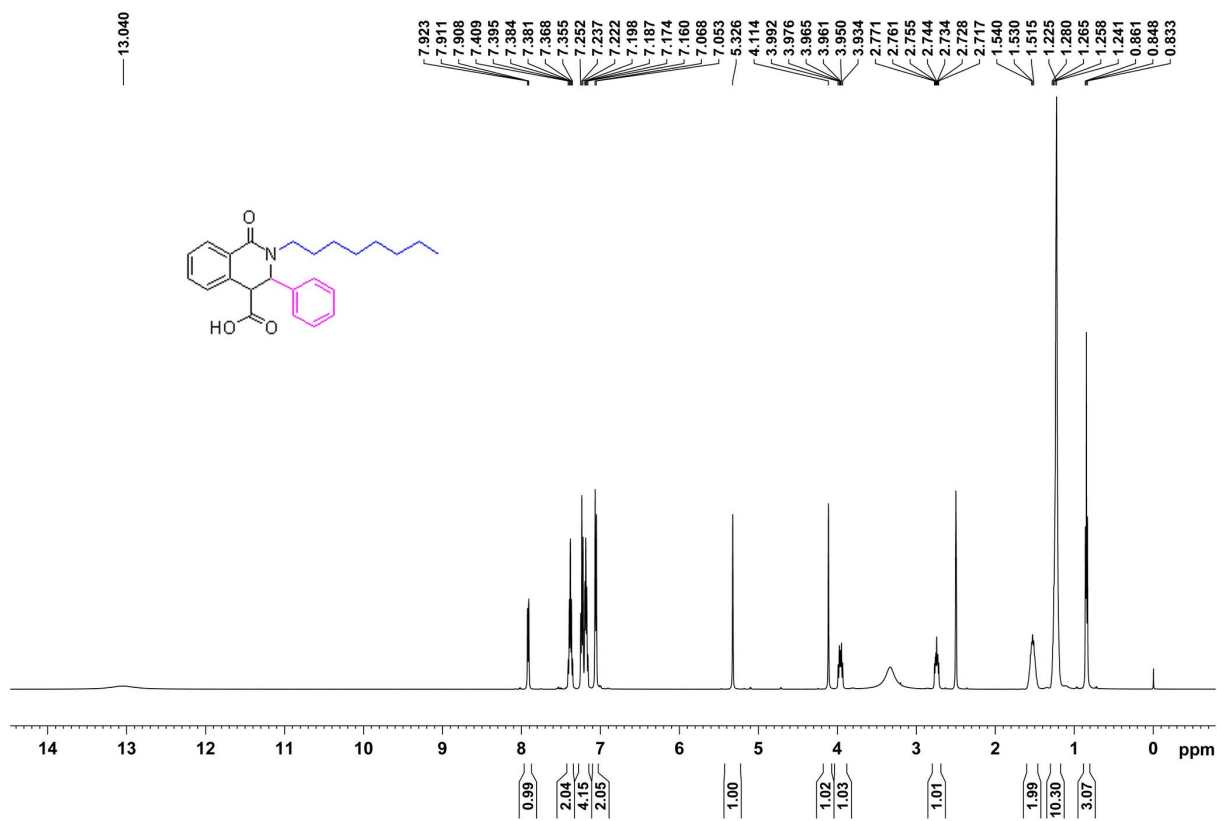

**Figure S11.** The  $^1\text{H}$  NMR spectrum of compound **I3**

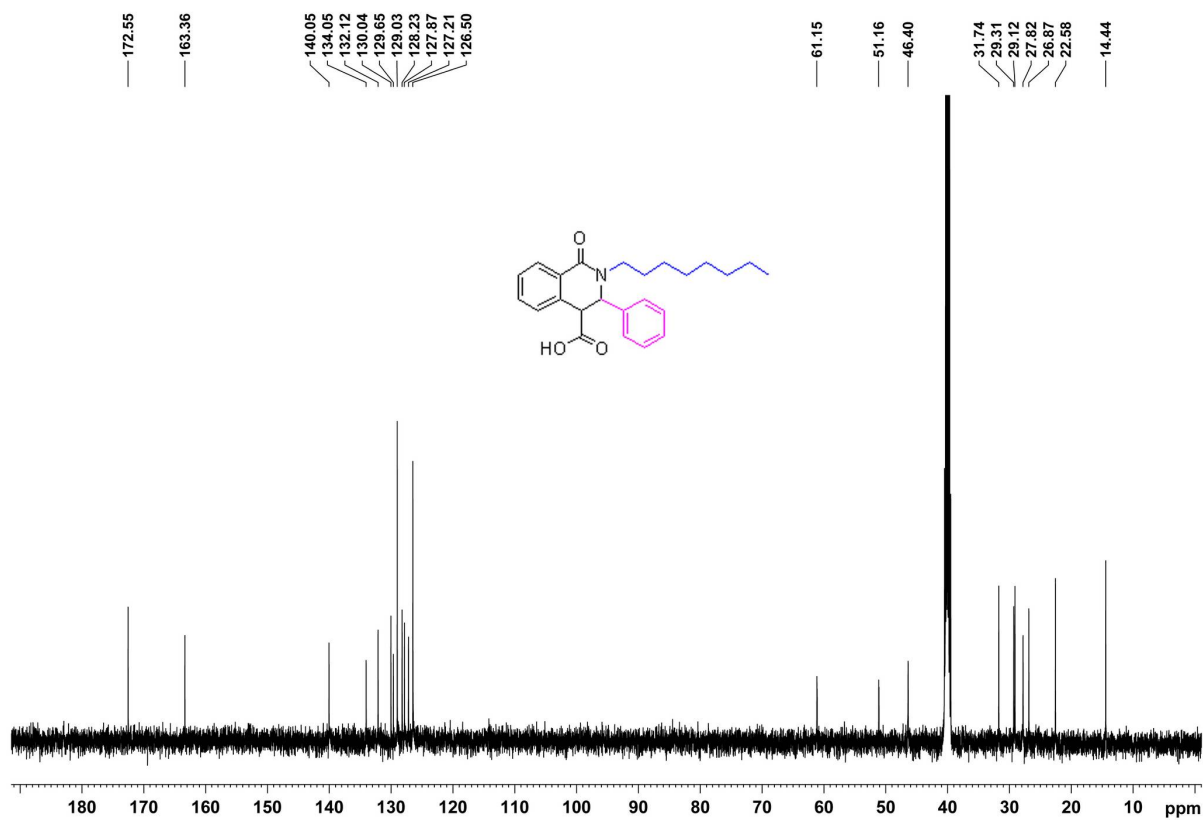

**Figure S12.** The  $^{13}\text{C}$  NMR spectrum of compound **I3**

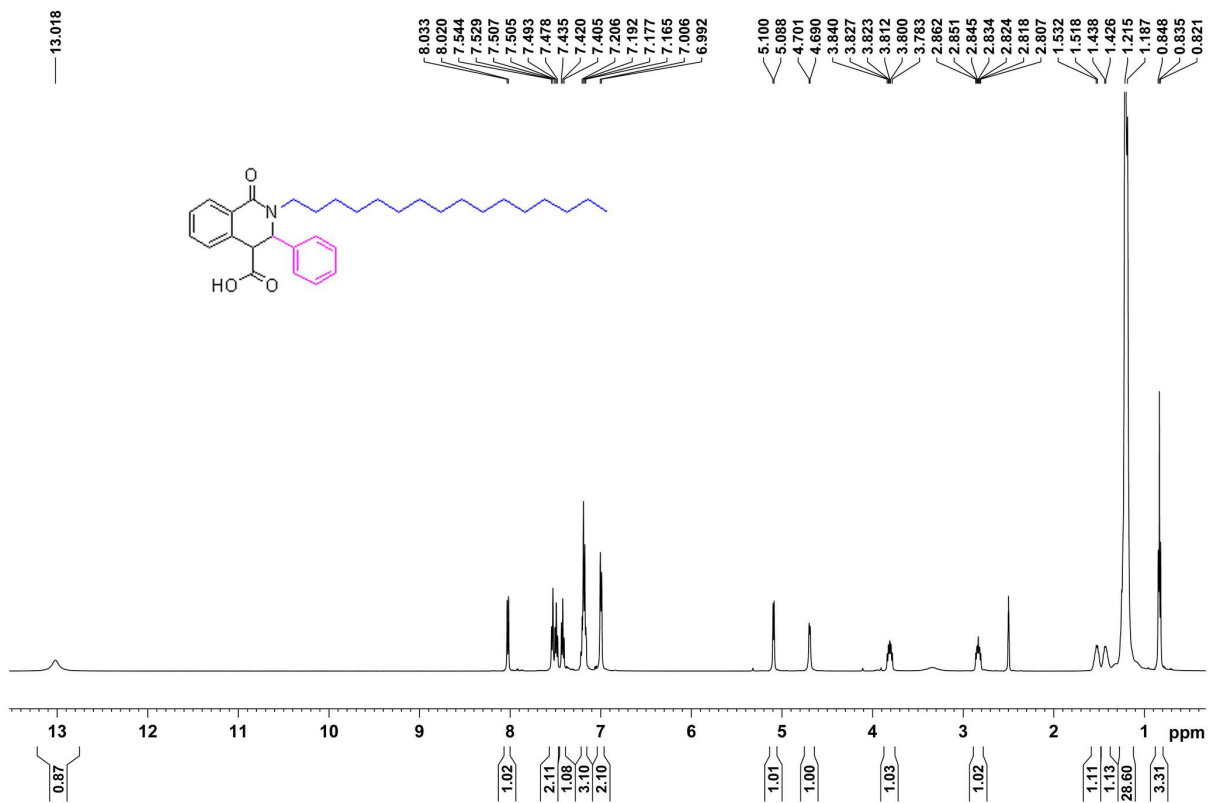

Figure S13. The <sup>1</sup>H NMR spectrum of compound I4

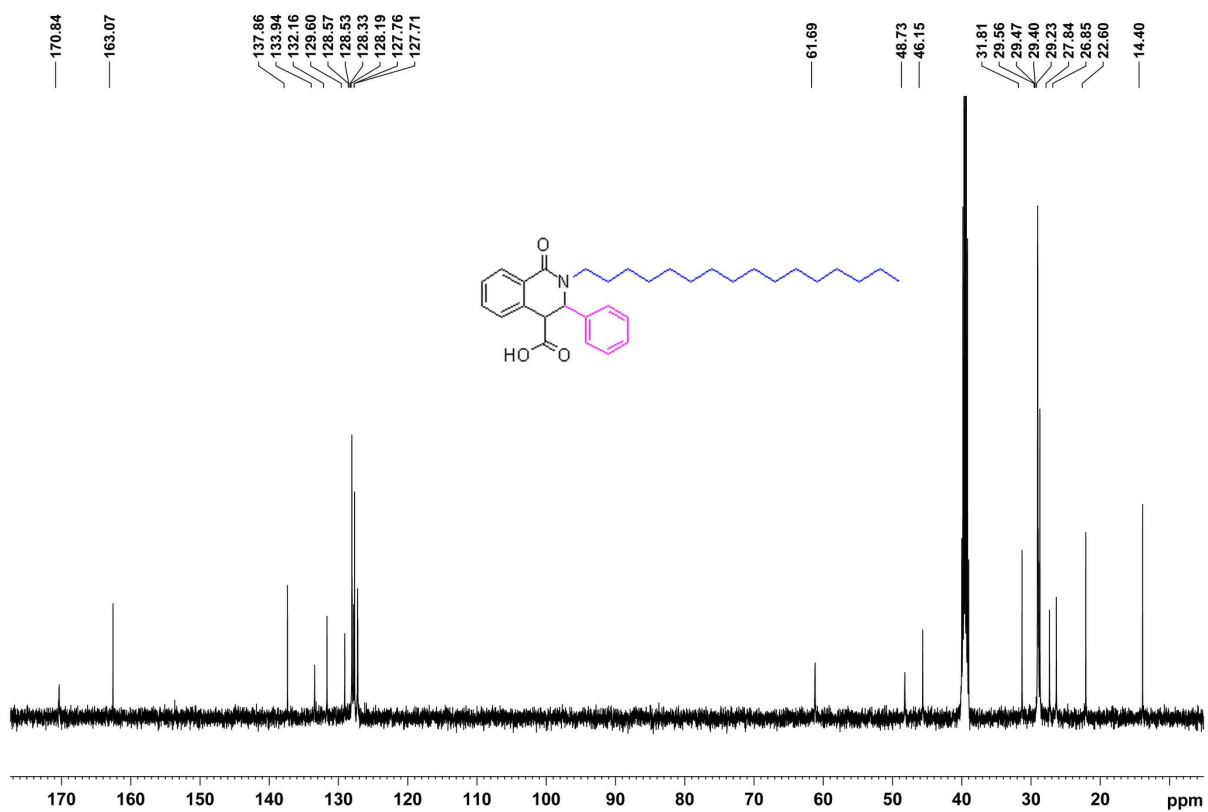

Figure S14. The <sup>13</sup>C NMR spectrum of compound I4

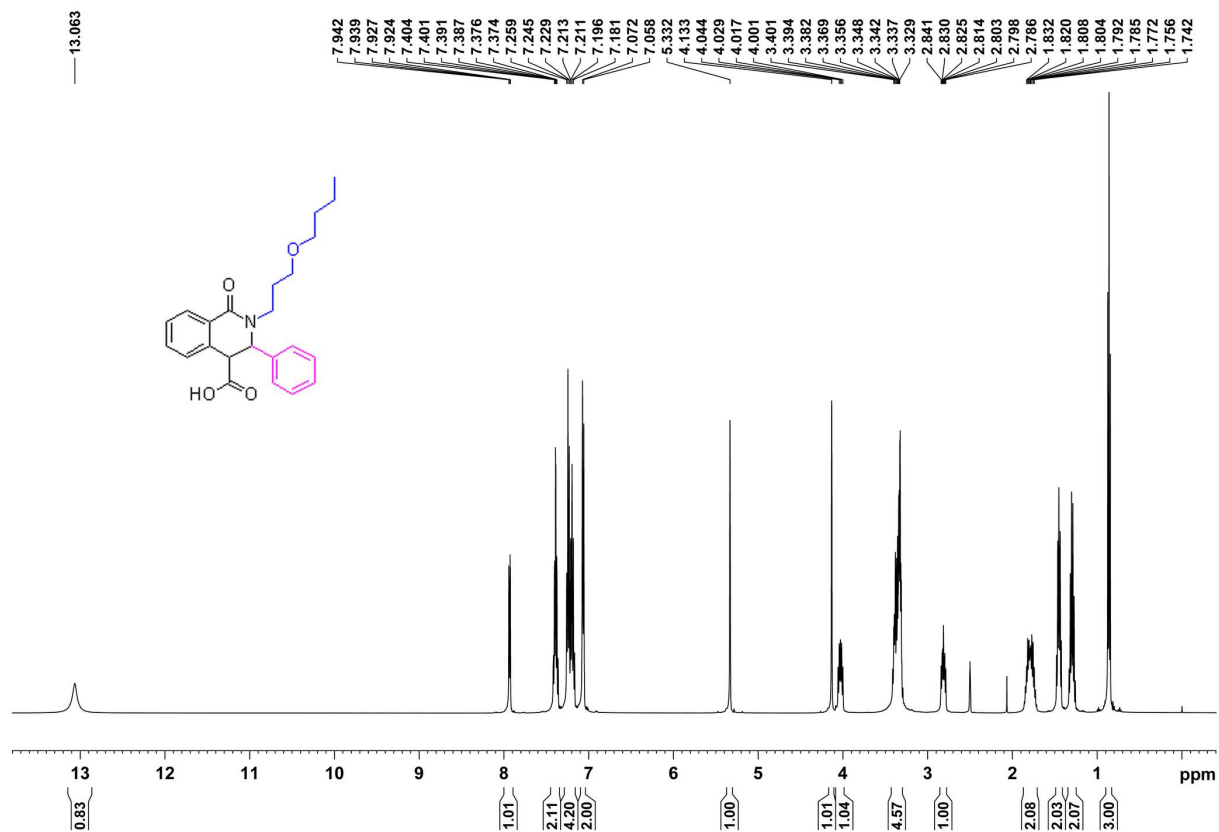

Figure S15. The <sup>1</sup>H NMR spectrum of compound I5

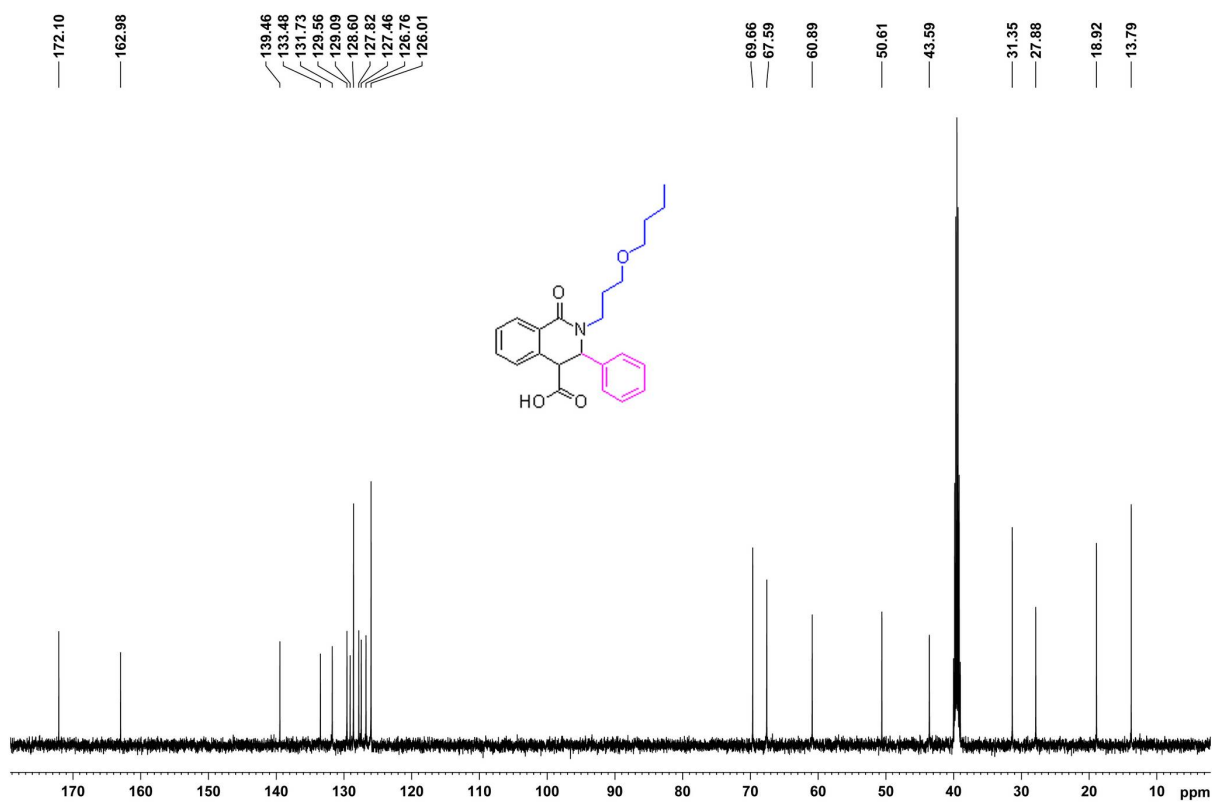

Figure S16. The <sup>13</sup>C NMR spectrum of compound I5

PROTON DMSO {D:\2020-3} ZHL 26

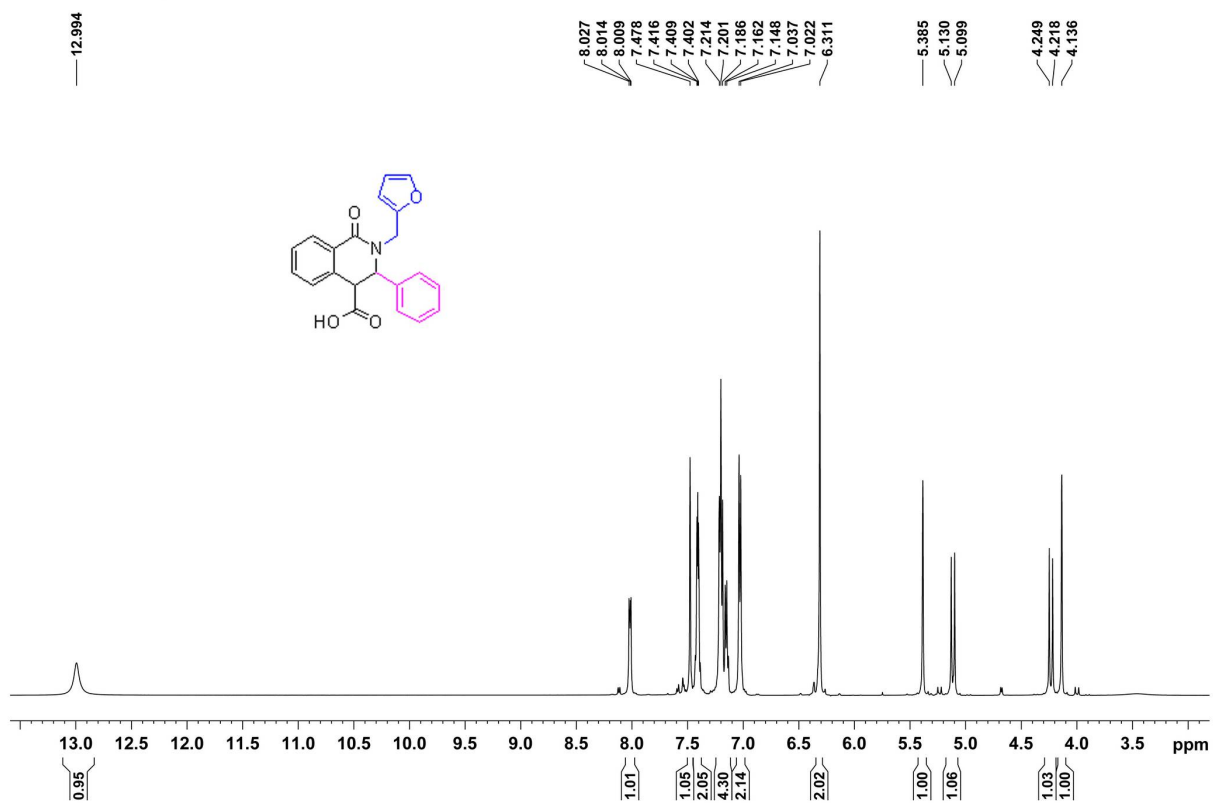

Figure S17. The <sup>1</sup>H NMR spectrum of compound I6



Figure S18. The <sup>13</sup>C NMR spectrum of compound I6

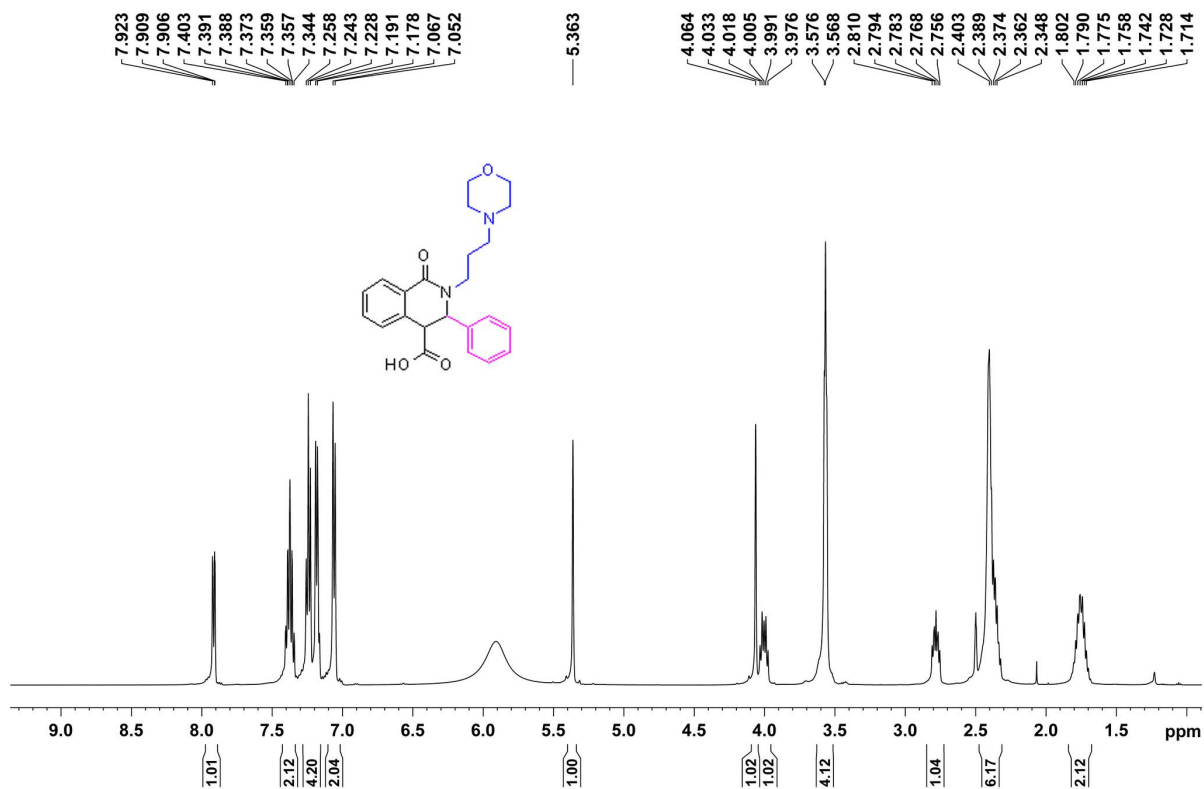

Figure S19. The <sup>1</sup>H NMR spectrum of compound I7

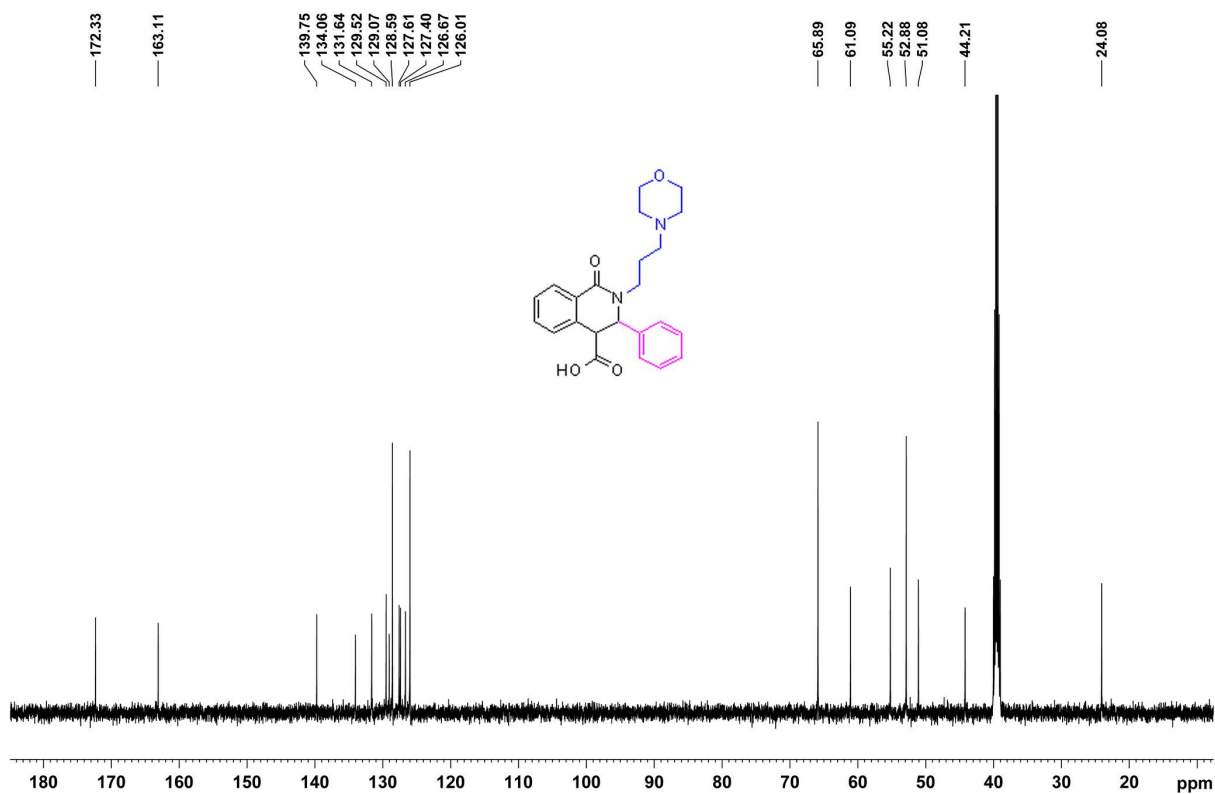

Figure S20. The <sup>13</sup>C NMR spectrum of compound I7



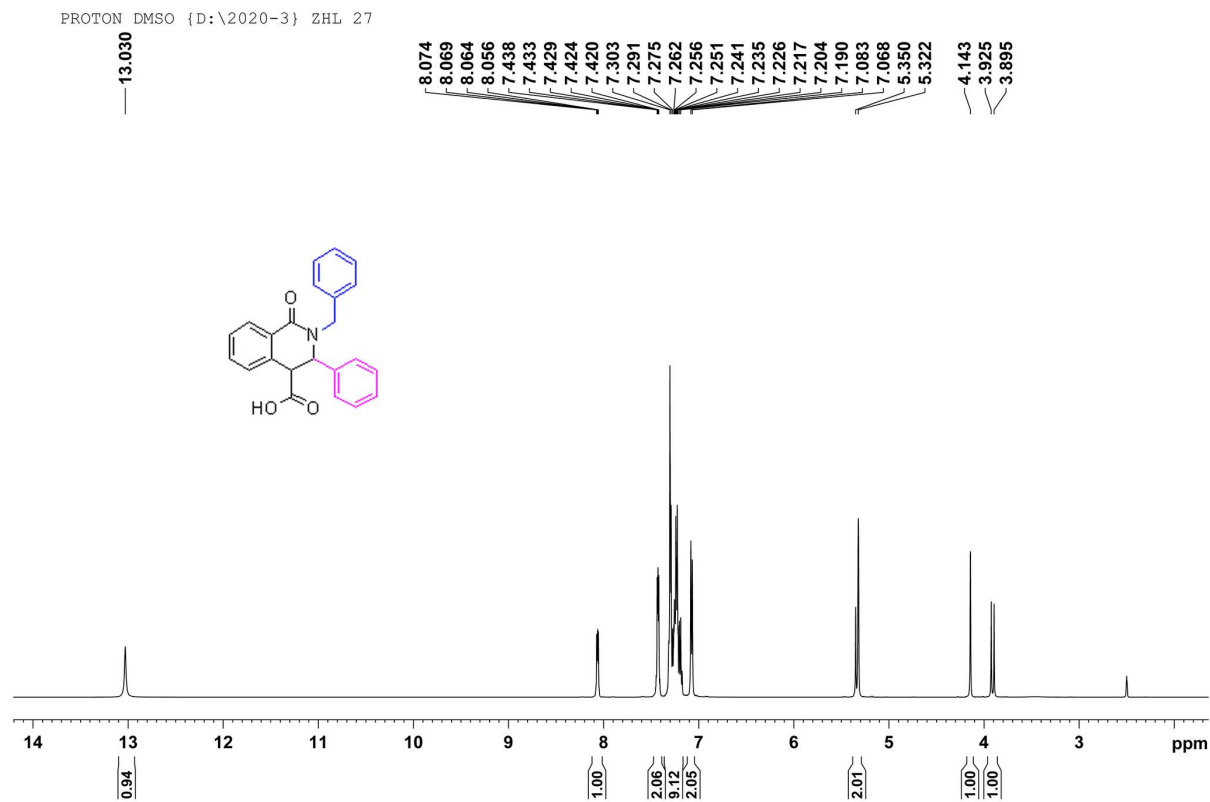

Figure S21. The  $^1\text{H}$  NMR spectrum of compound I8

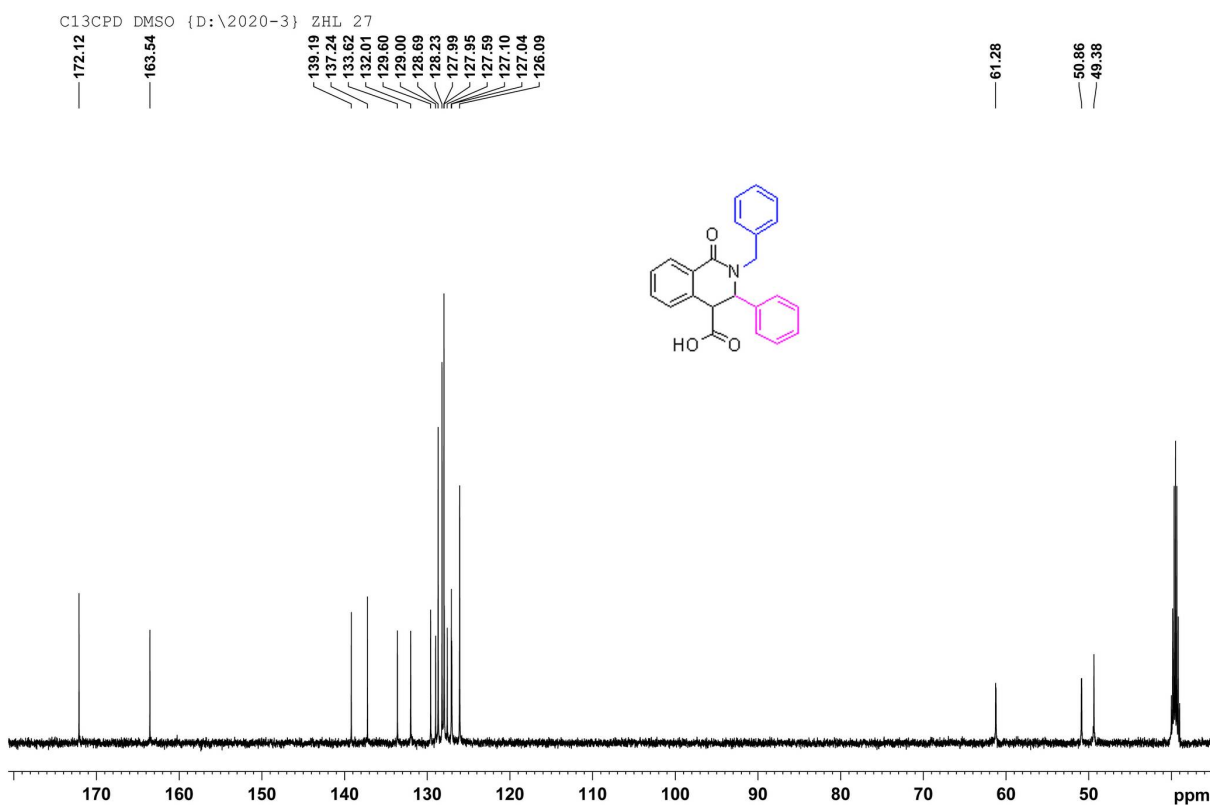

Figure S22. The  $^{13}\text{C}$  NMR spectrum of compound I8

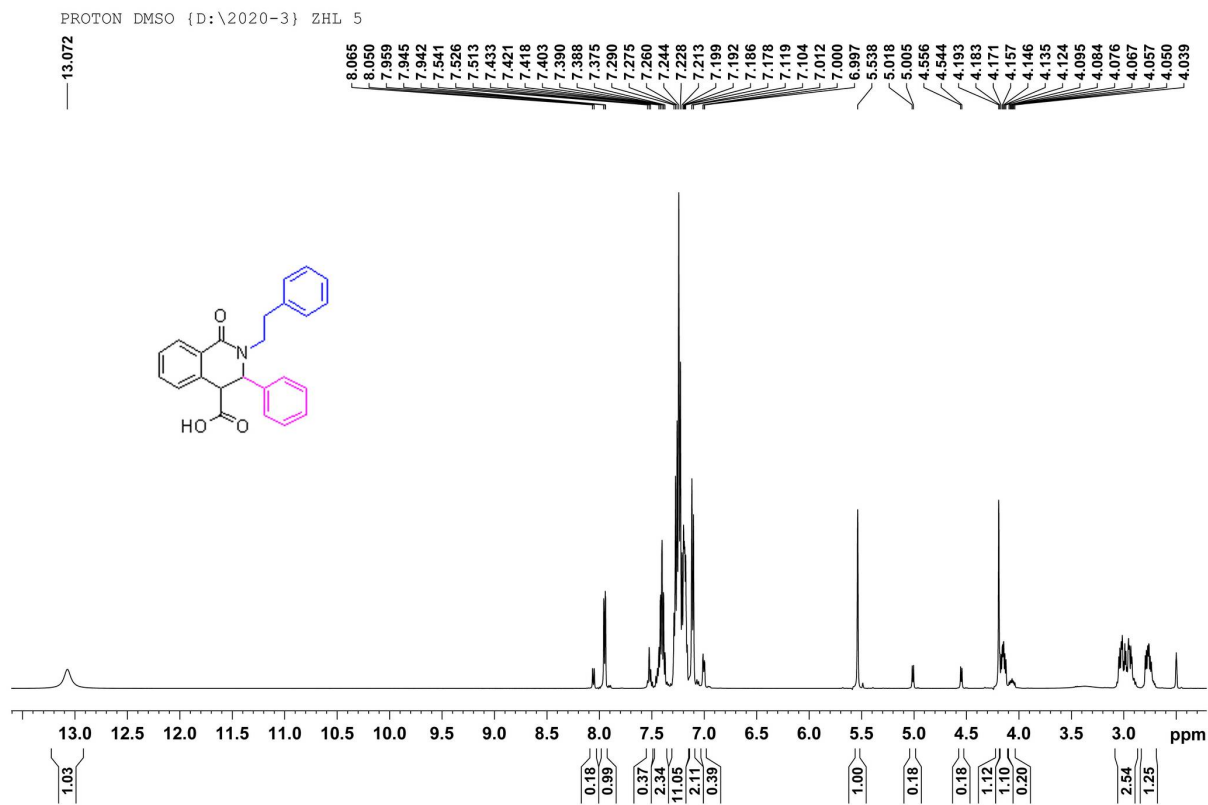

Figure S23. The  $^1\text{H}$  NMR spectrum of compound **I9**

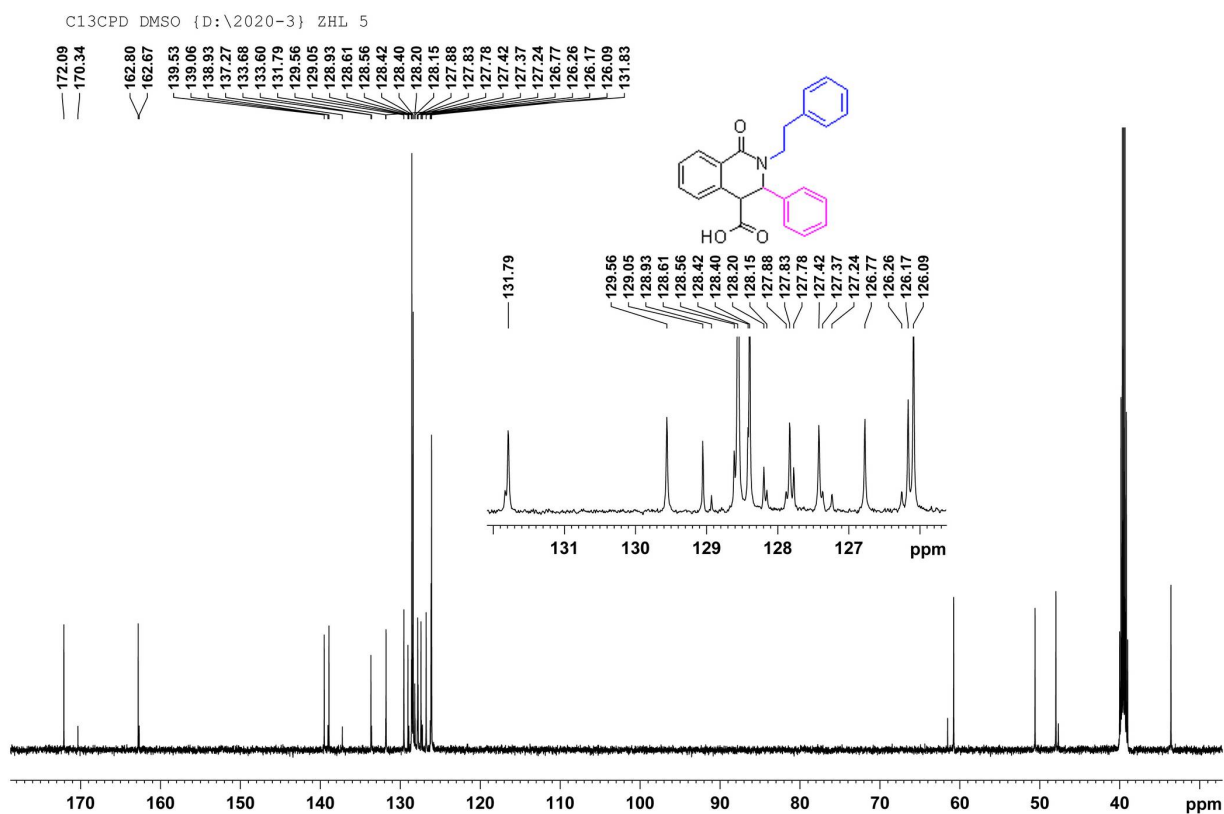

Figure S24. The  $^{13}\text{C}$  NMR spectrum of compound **I9**

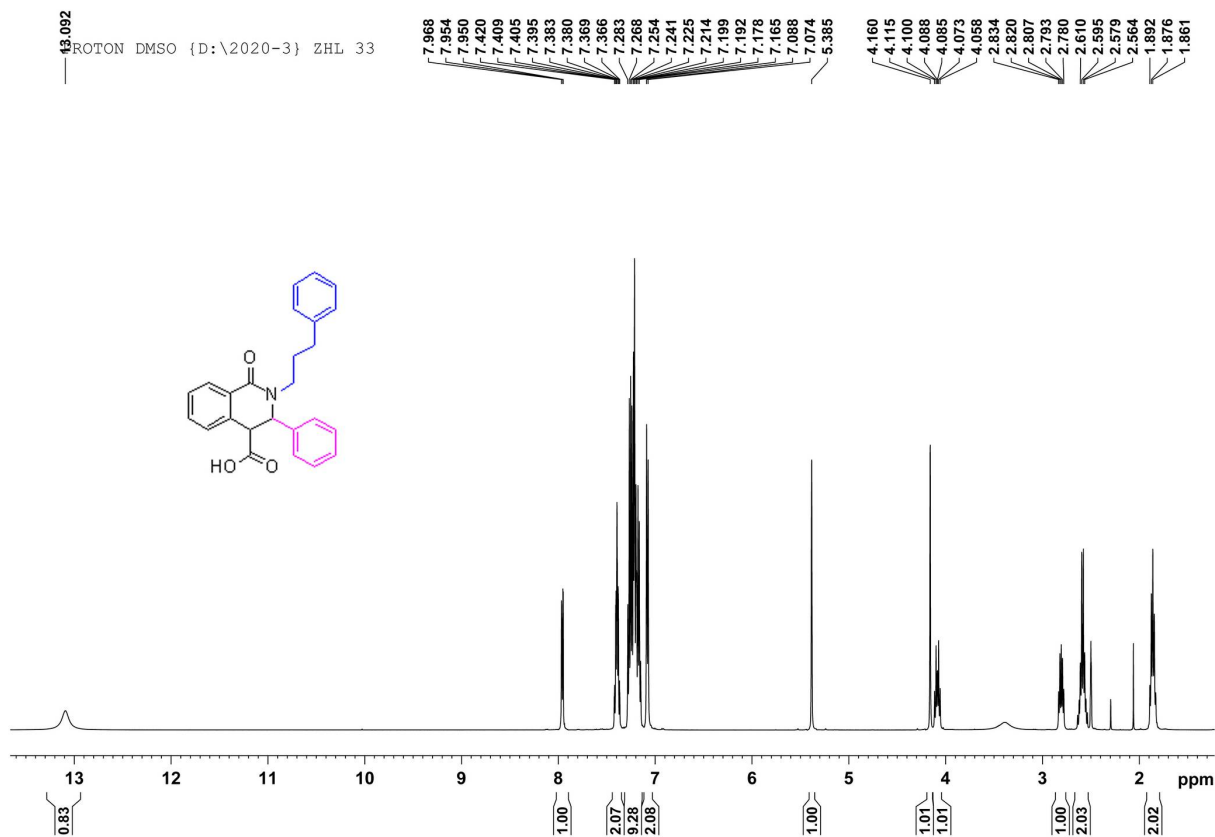

Figure S25. The  $^1\text{H}$  NMR spectrum of compound I10

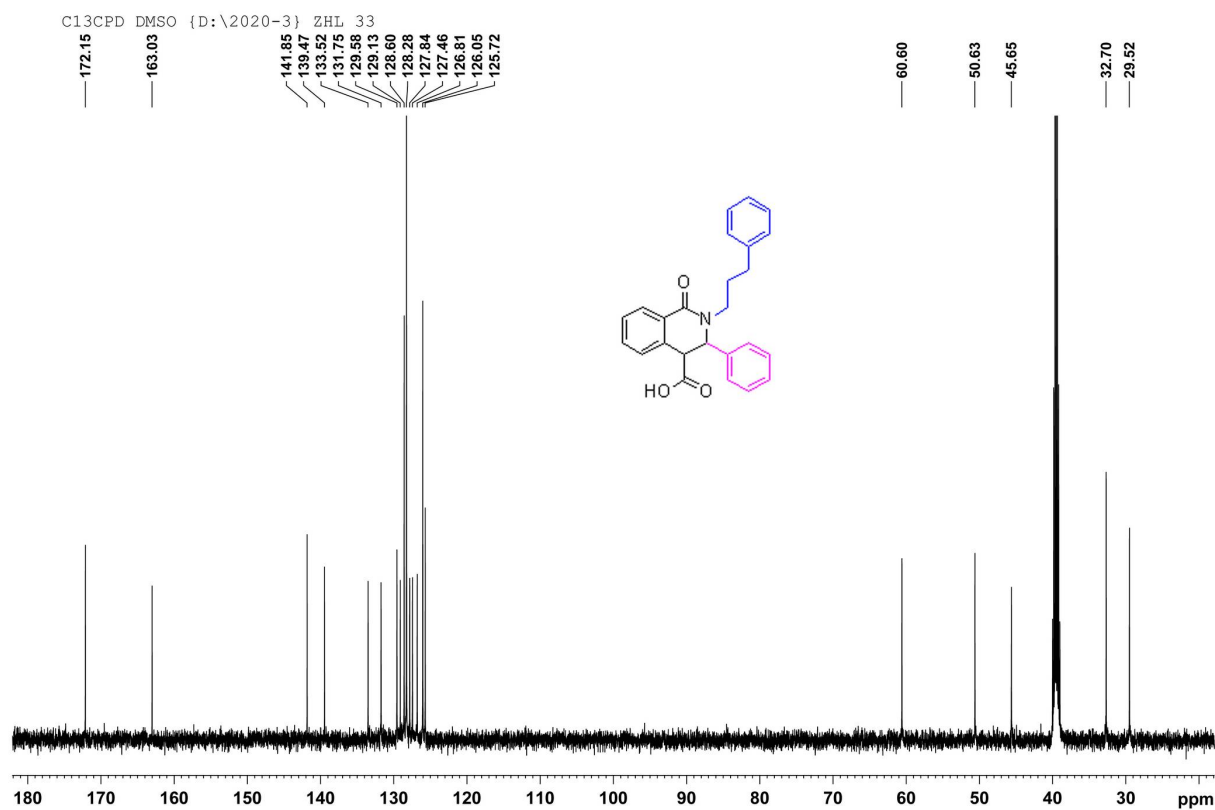

Figure S26. The  $^{13}\text{C}$  NMR spectrum of compound I10

PROTON DMSO {D:\2020-3} ZHL 6

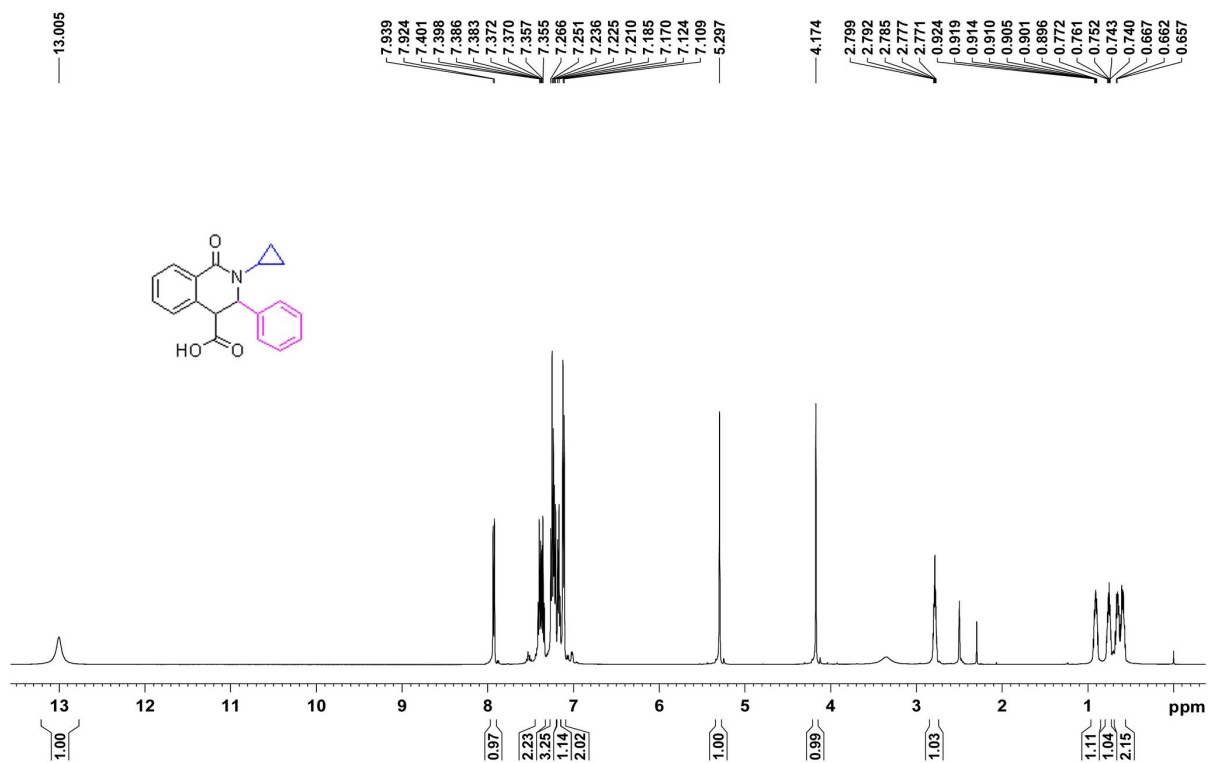

Figure S27. The  $^1\text{H}$  NMR spectrum of compound I11

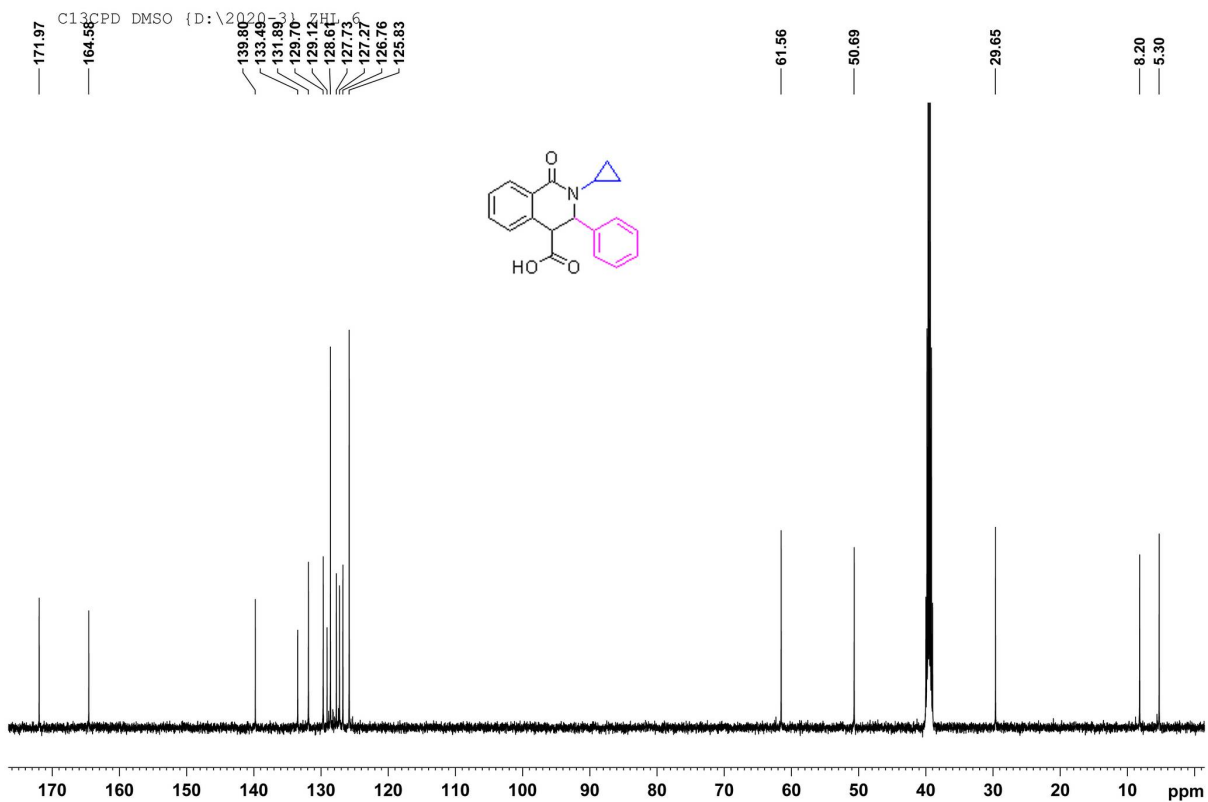

Figure S28. The  $^{13}\text{C}$  NMR spectrum of compound I11

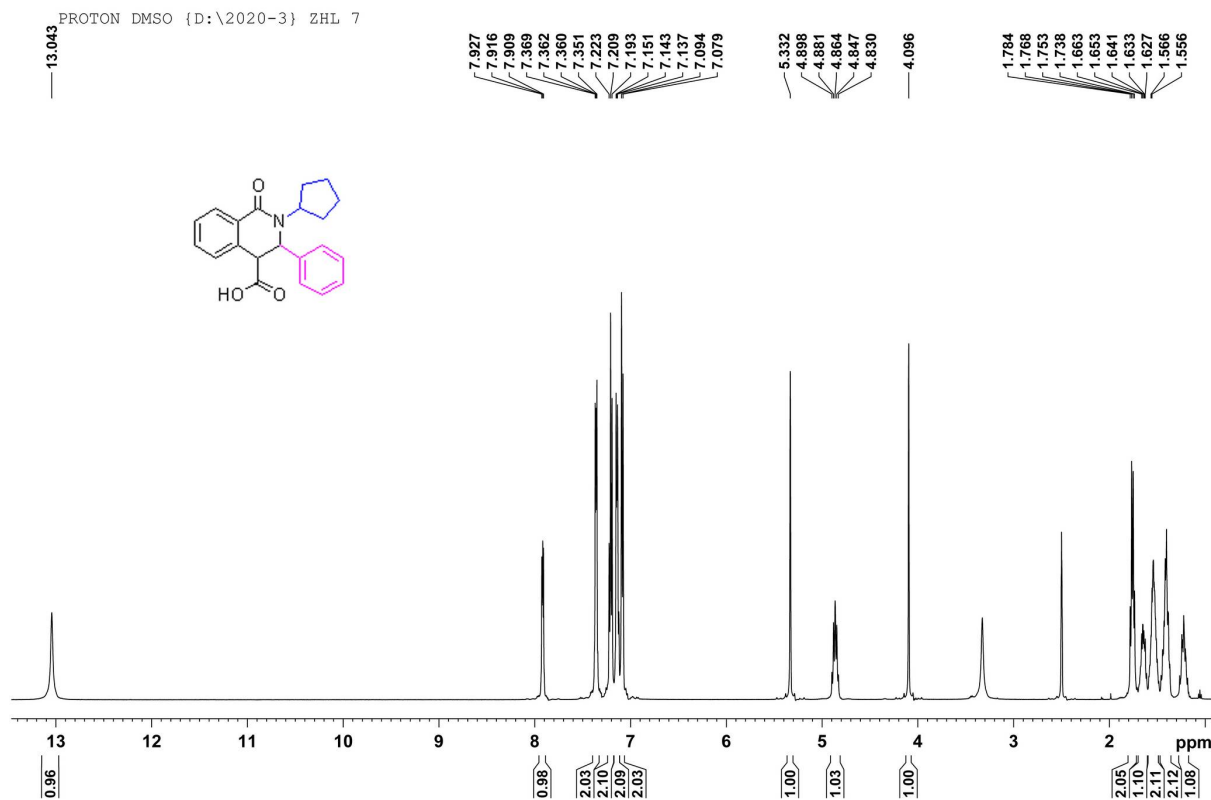

Figure S29. The  $^1\text{H}$  NMR spectrum of compound I12

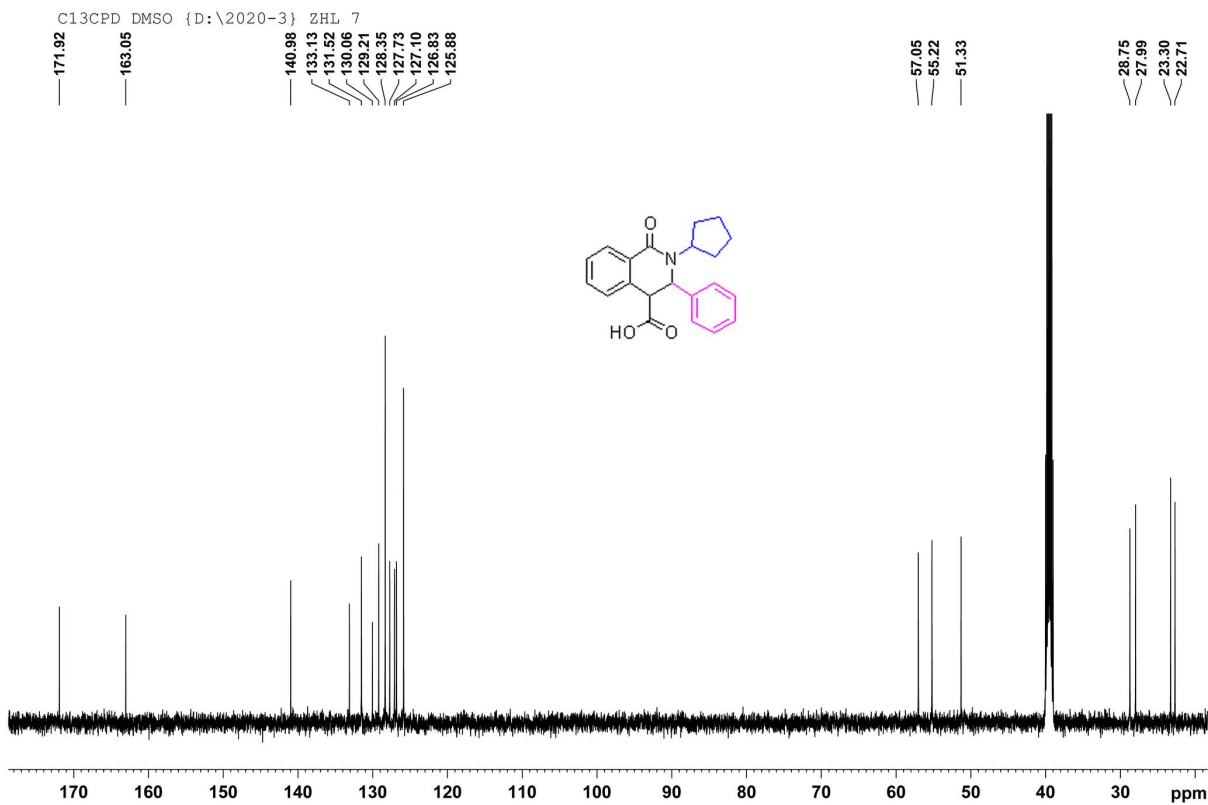

Figure S30. The  $^{13}\text{C}$  NMR spectrum of compound I12

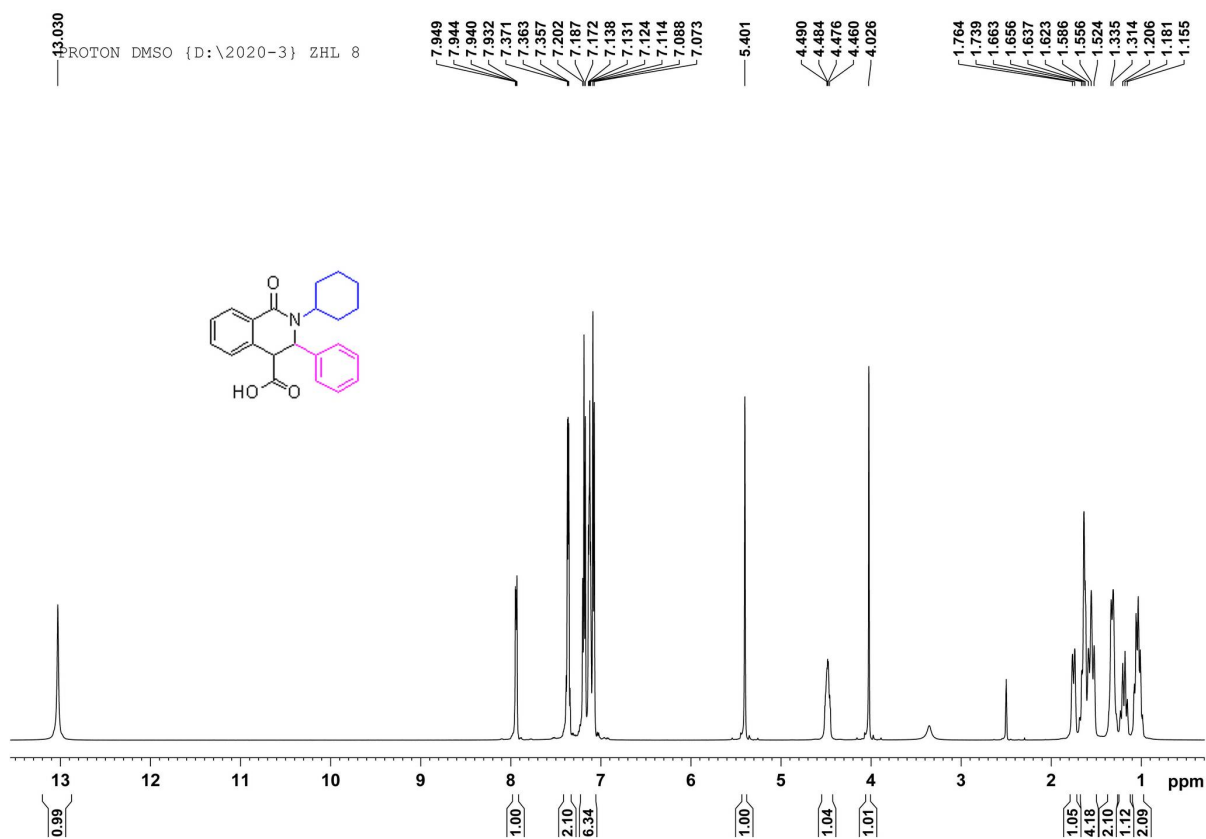

Figure S31. The  $^1\text{H}$  NMR spectrum of compound I13



Figure S32. The  $^{13}\text{C}$  NMR spectrum of compound I13

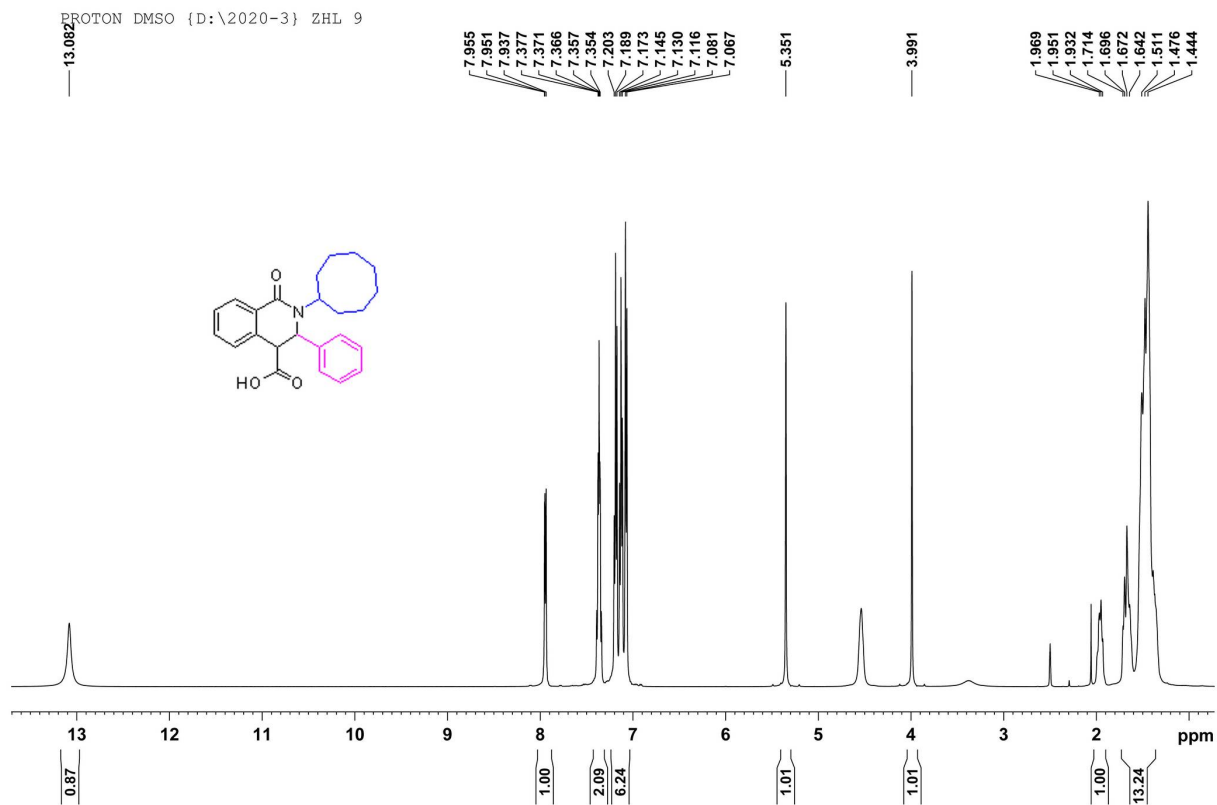

Figure S33. The  $^1\text{H}$  NMR spectrum of compound I14

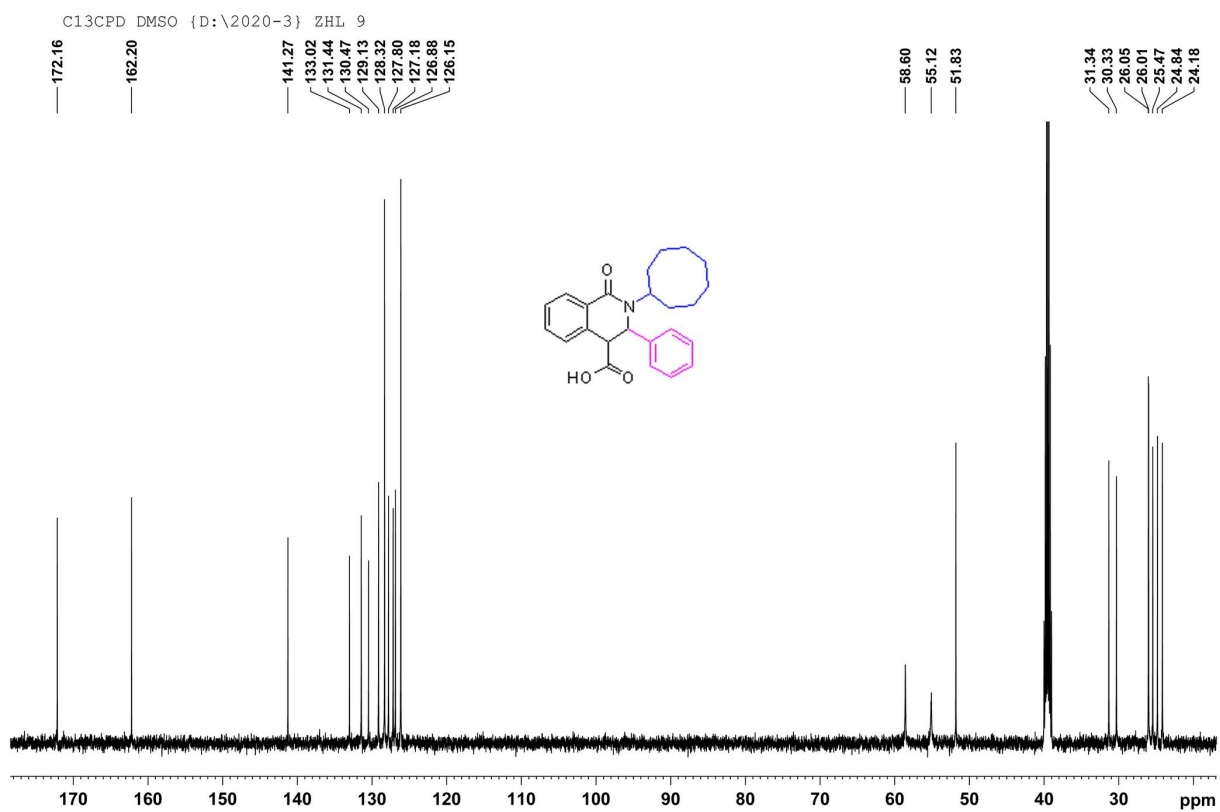

Figure S34. The  $^{13}\text{C}$  NMR spectrum of compound I14

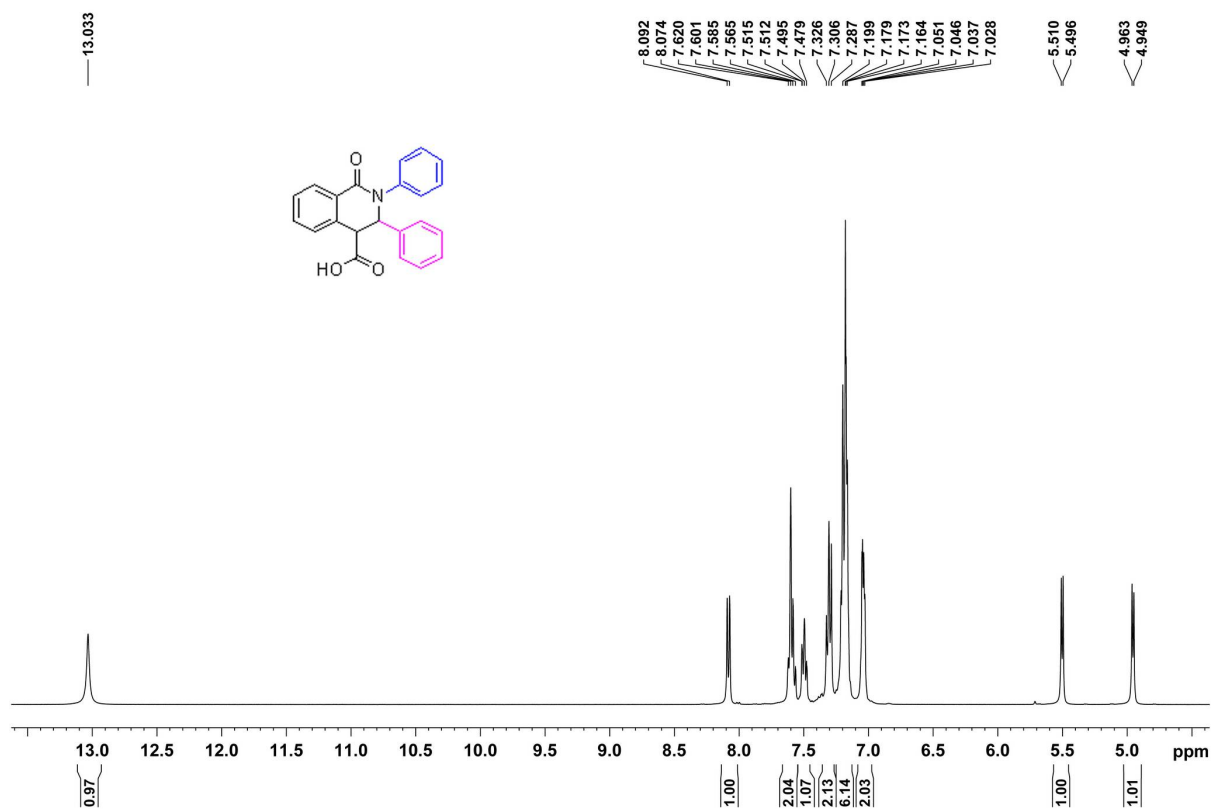

Figure S35. The  $^1\text{H}$  NMR spectrum of compound I15

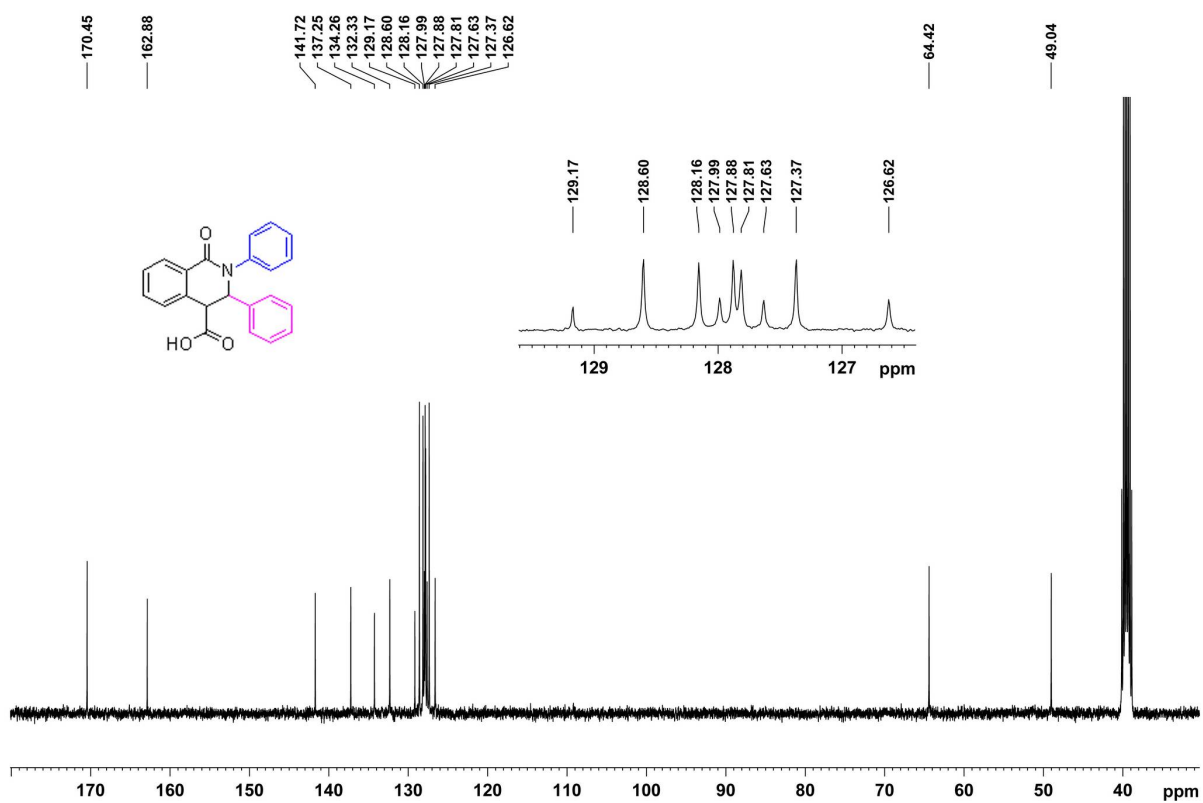

Figure S36. The  $^{13}\text{C}$  NMR spectrum of compound I15



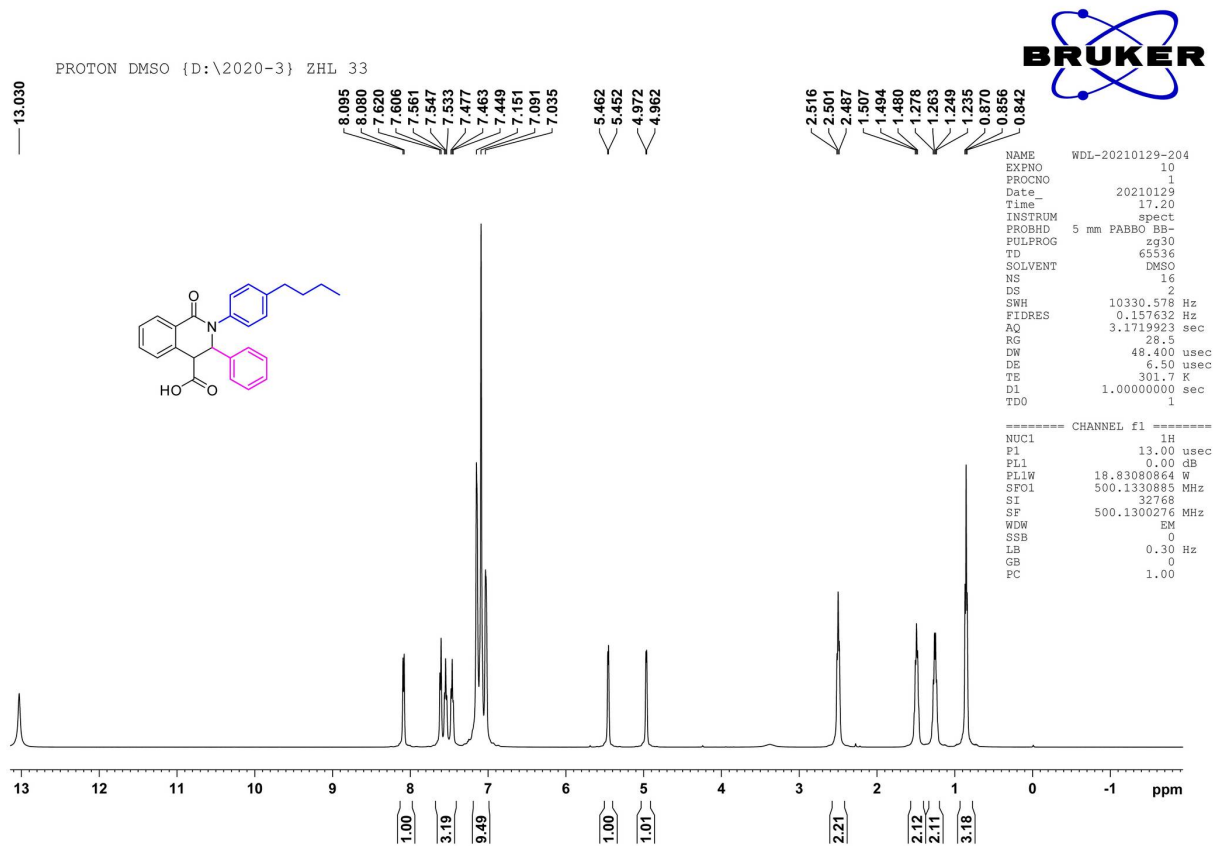

Figure S37. The  $^1\text{H}$  NMR spectrum of compound I16

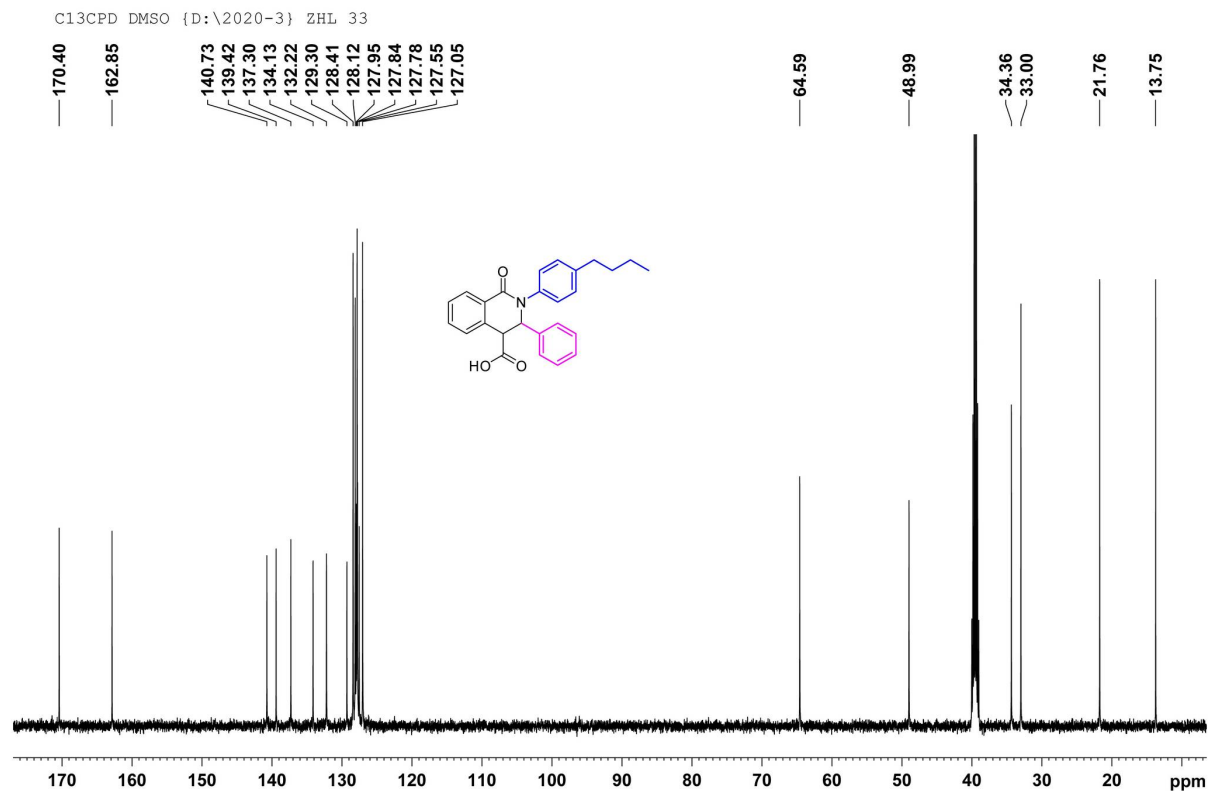

Figure S38. The  $^{13}\text{C}$  NMR spectrum of compound I16

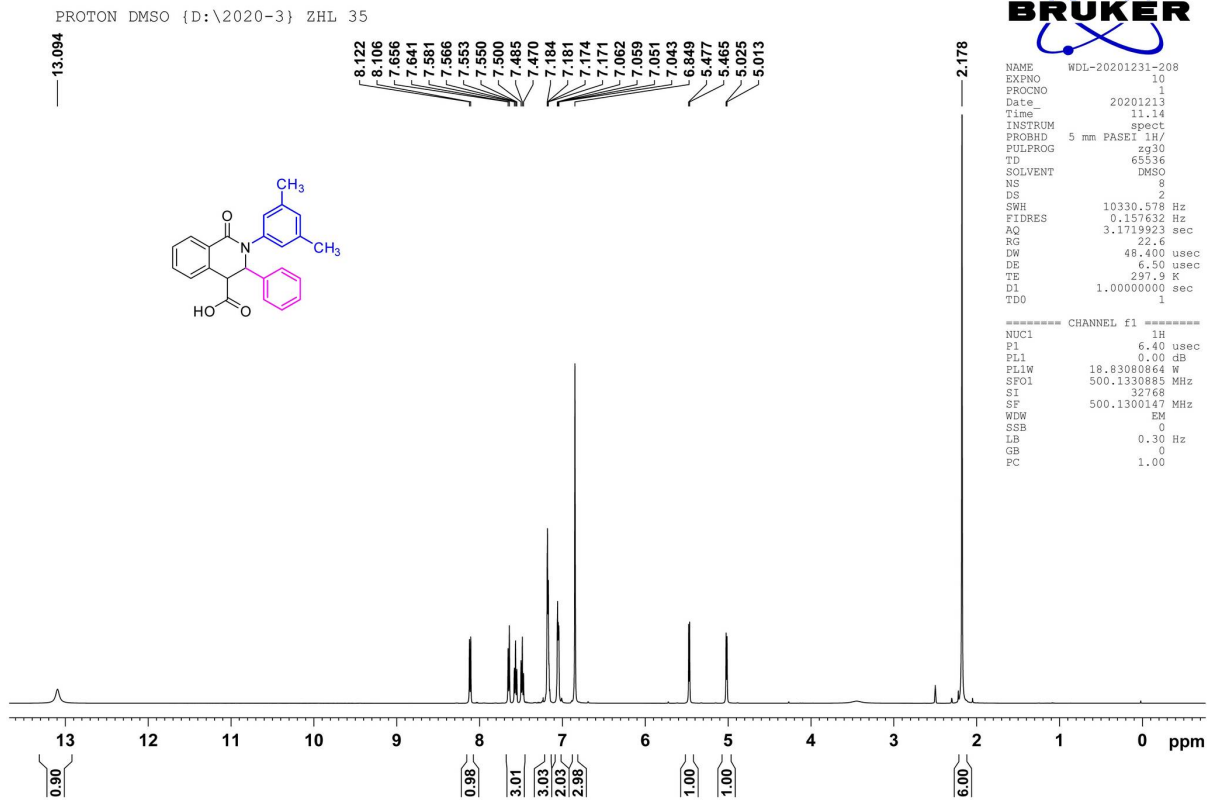

Figure S39. The  $^1\text{H}$  NMR spectrum of compound I17

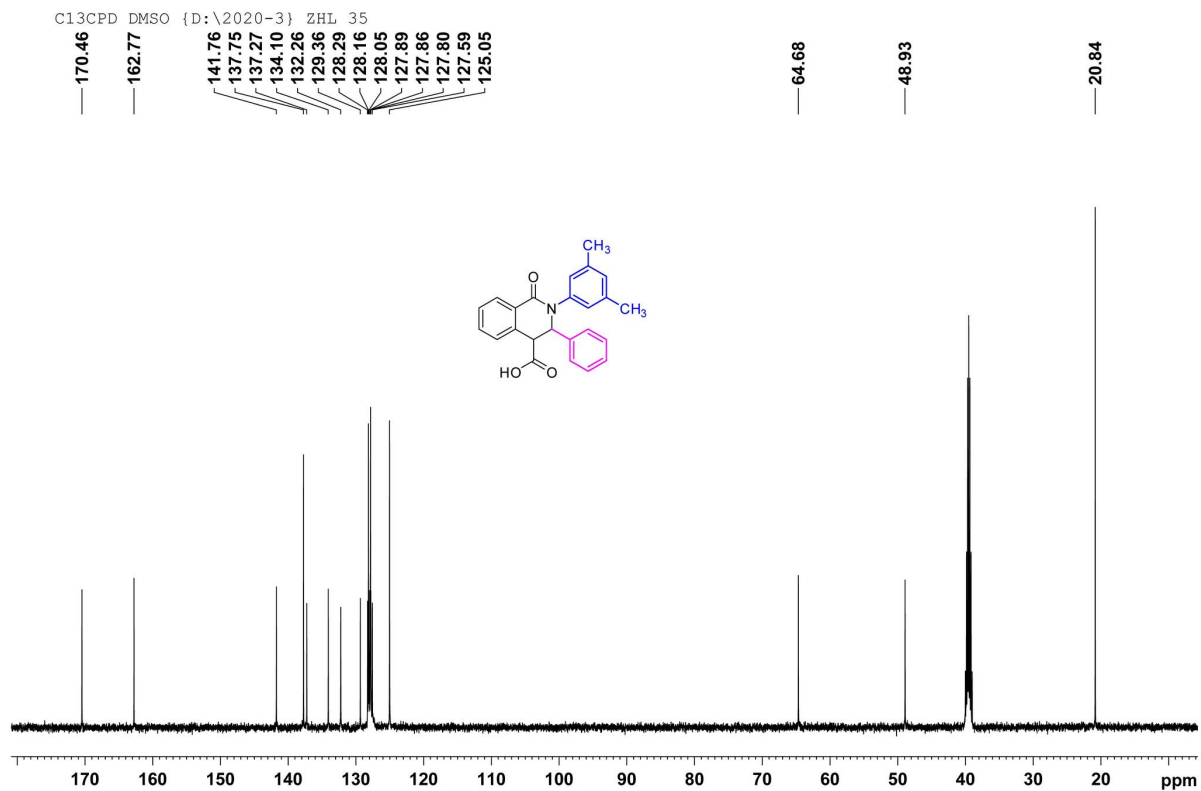

Figure S40. The  $^{13}\text{C}$  NMR spectrum of compound I17

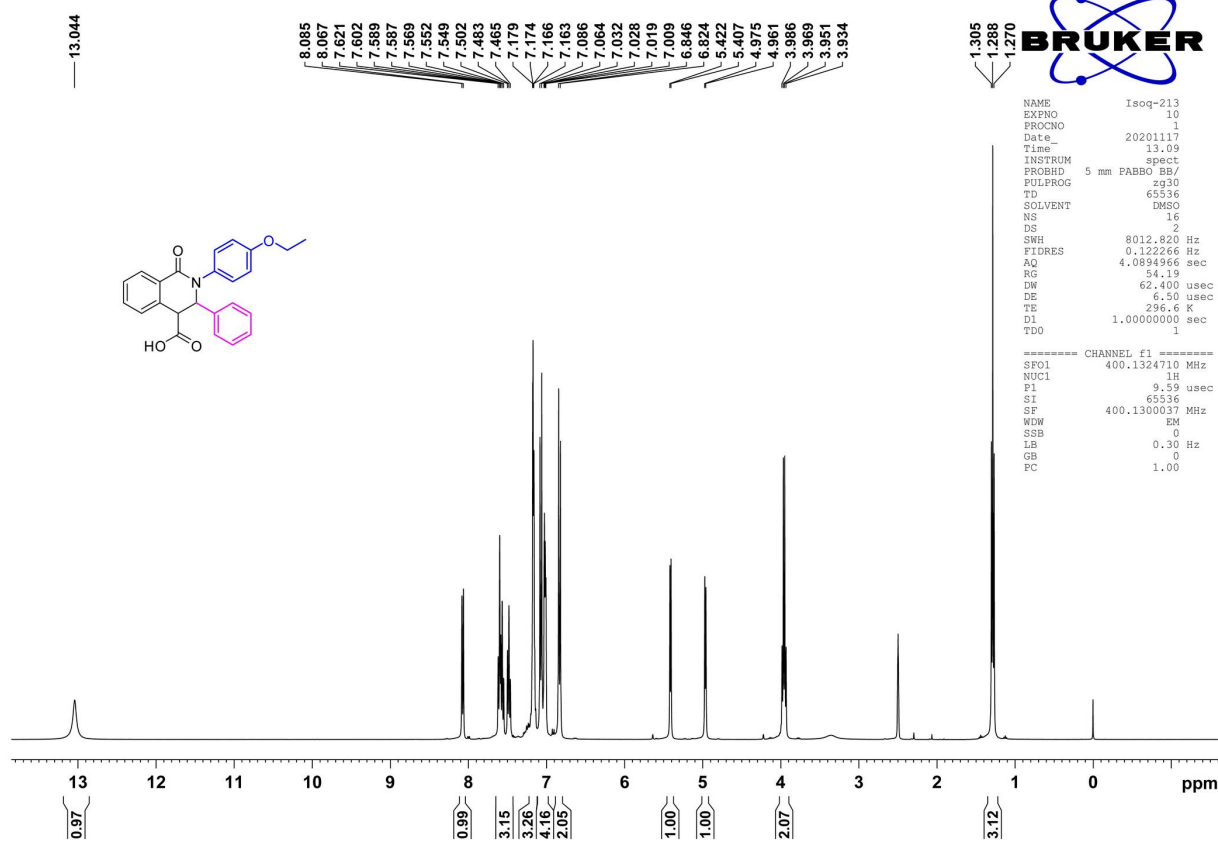

Figure S41. The  $^1\text{H}$  NMR spectrum of compound I18

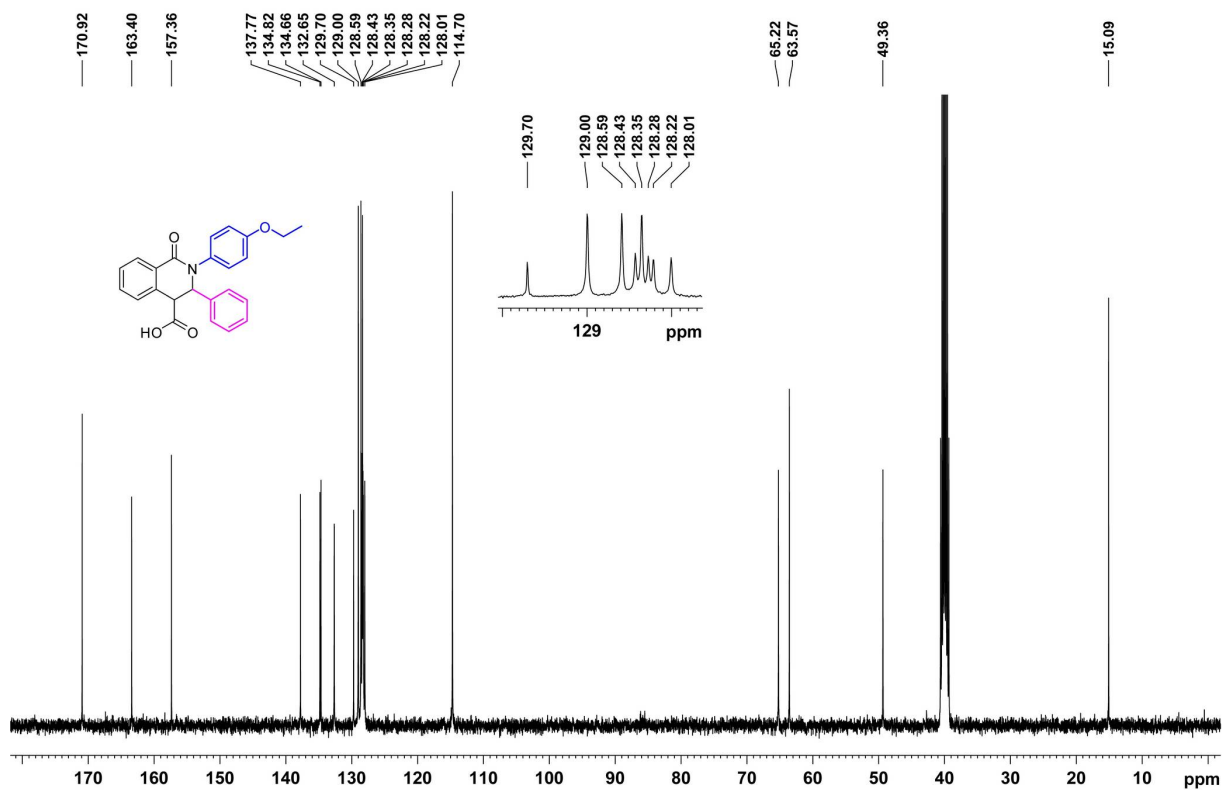

Figure S42. The  $^{13}\text{C}$  NMR spectrum of compound I18

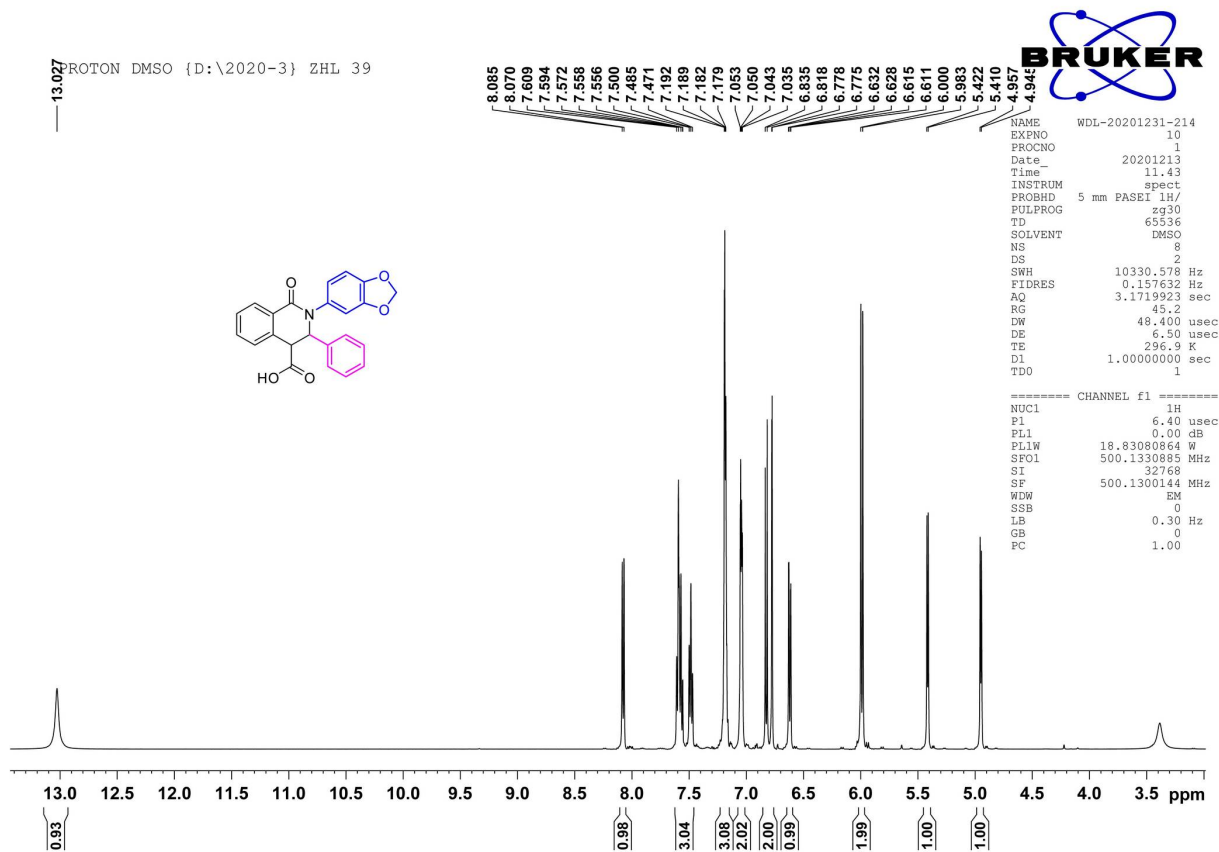

Figure S43. The  $^1\text{H}$  NMR spectrum of compound I19

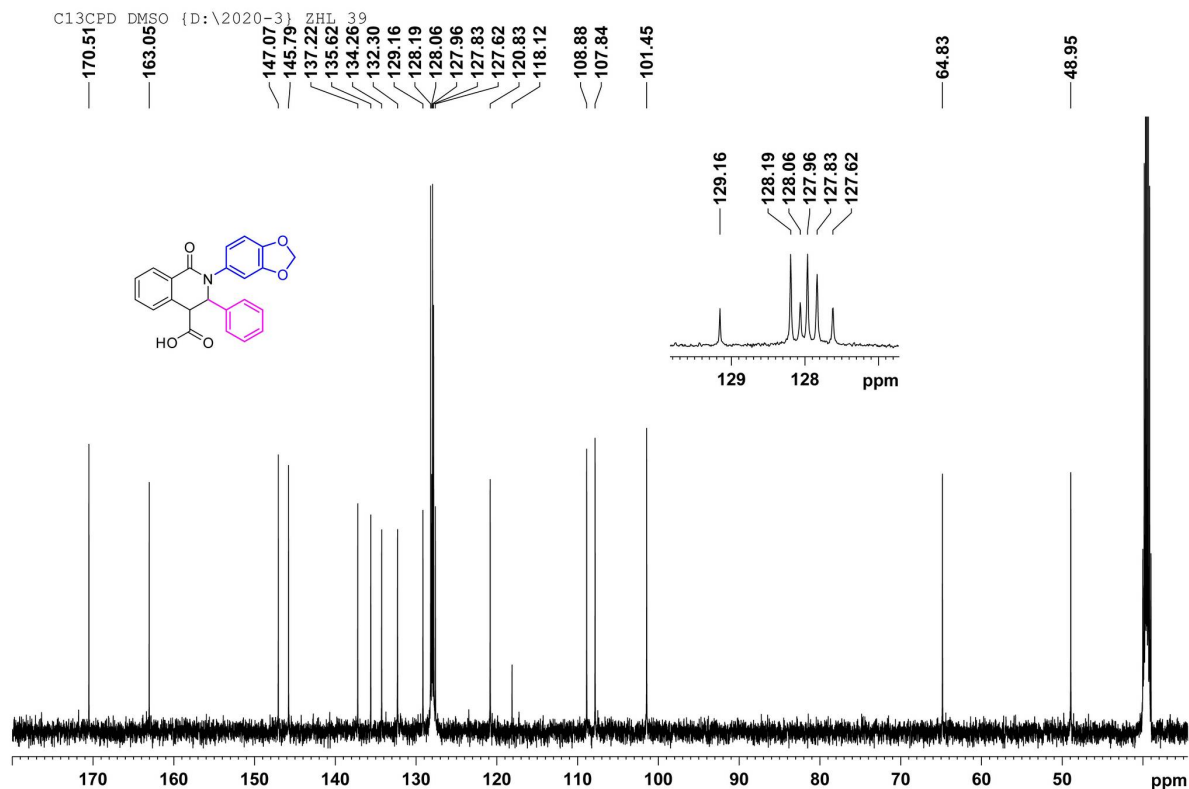

Figure S44. The  $^{13}\text{C}$  NMR spectrum of compound I19

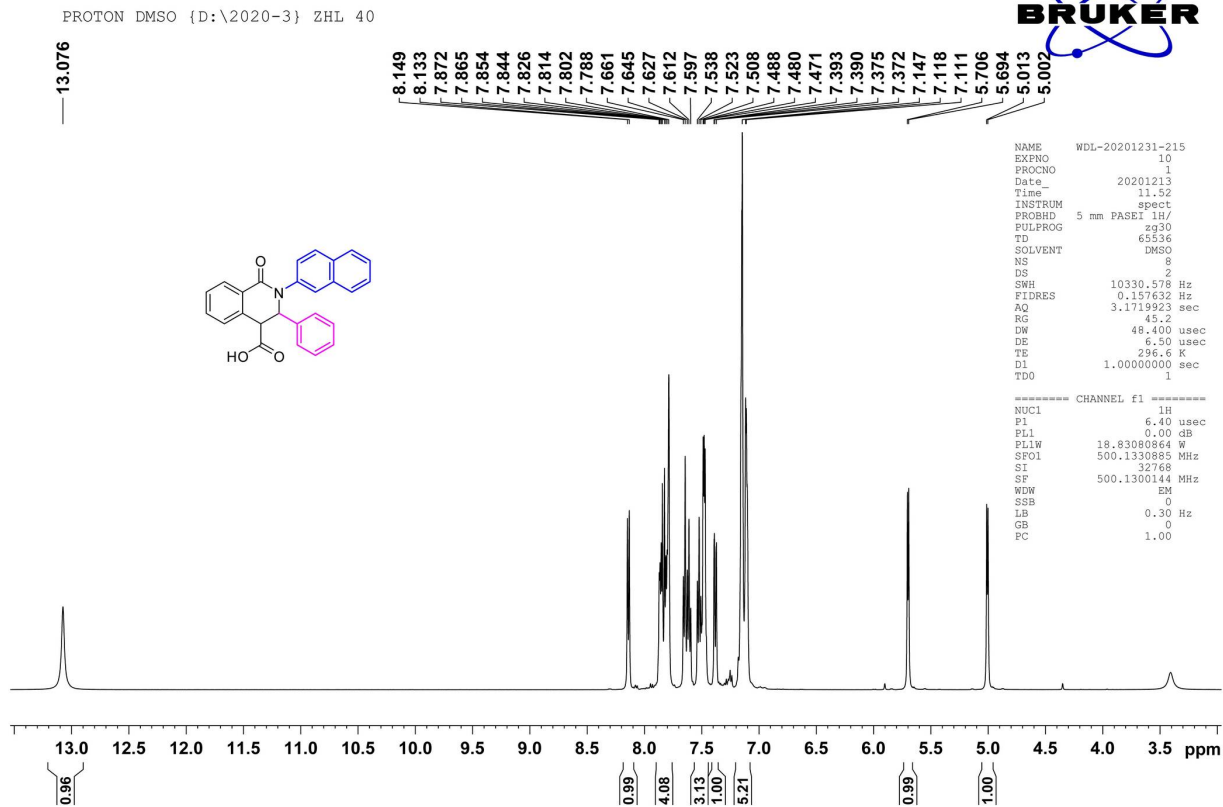

Figure S45. The  $^1\text{H}$  NMR spectrum of compound I20

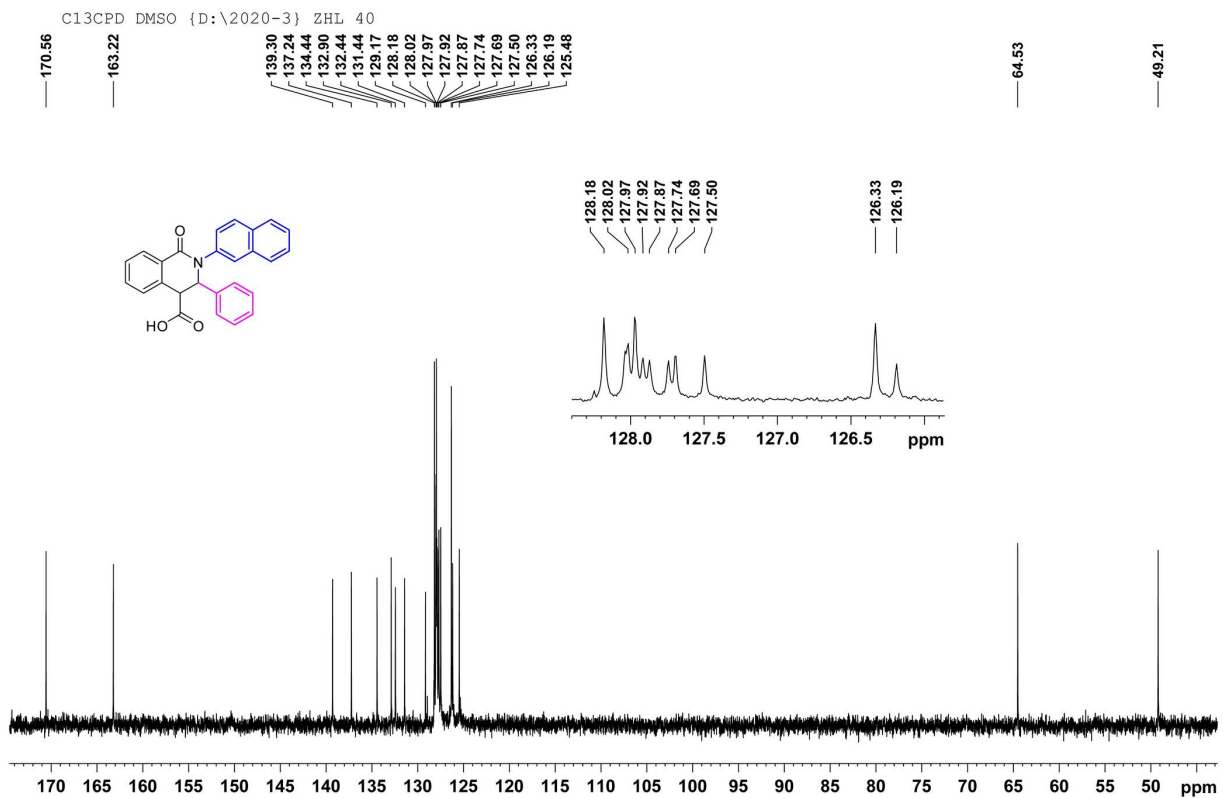

Figure S46. The  $^{13}\text{C}$  NMR spectrum of compound I20

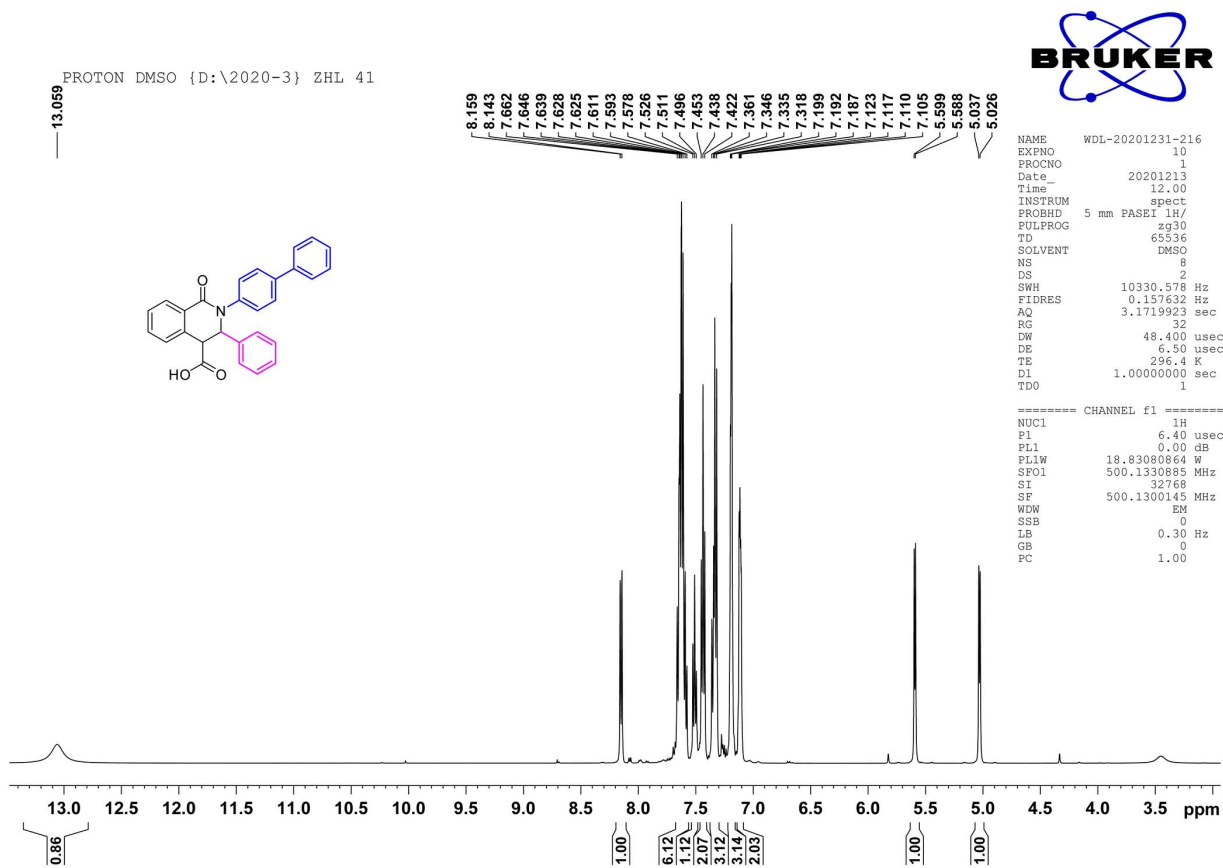

Figure S47. The  $^1\text{H}$  NMR spectrum of compound I21

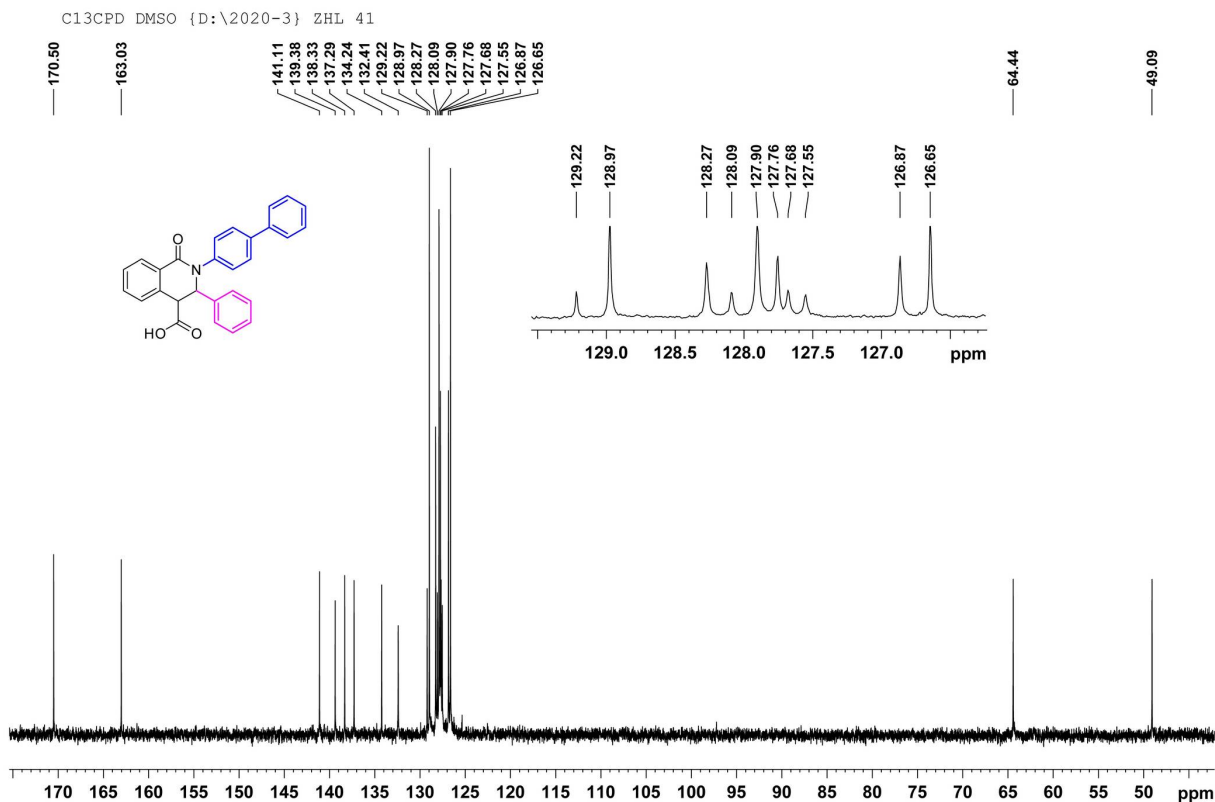

Figure S48. The  $^{13}\text{C}$  NMR spectrum of compound I21

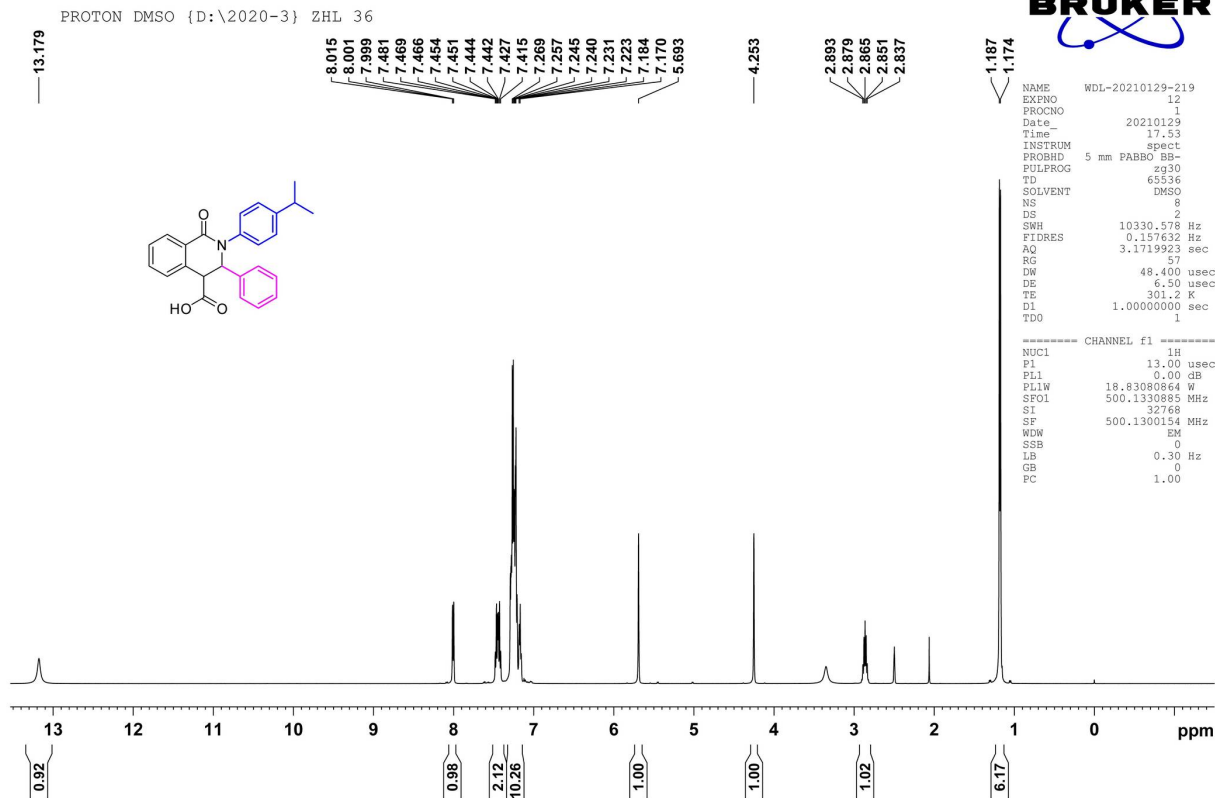

Figure S49. The  $^1\text{H}$  NMR spectrum of compound I22

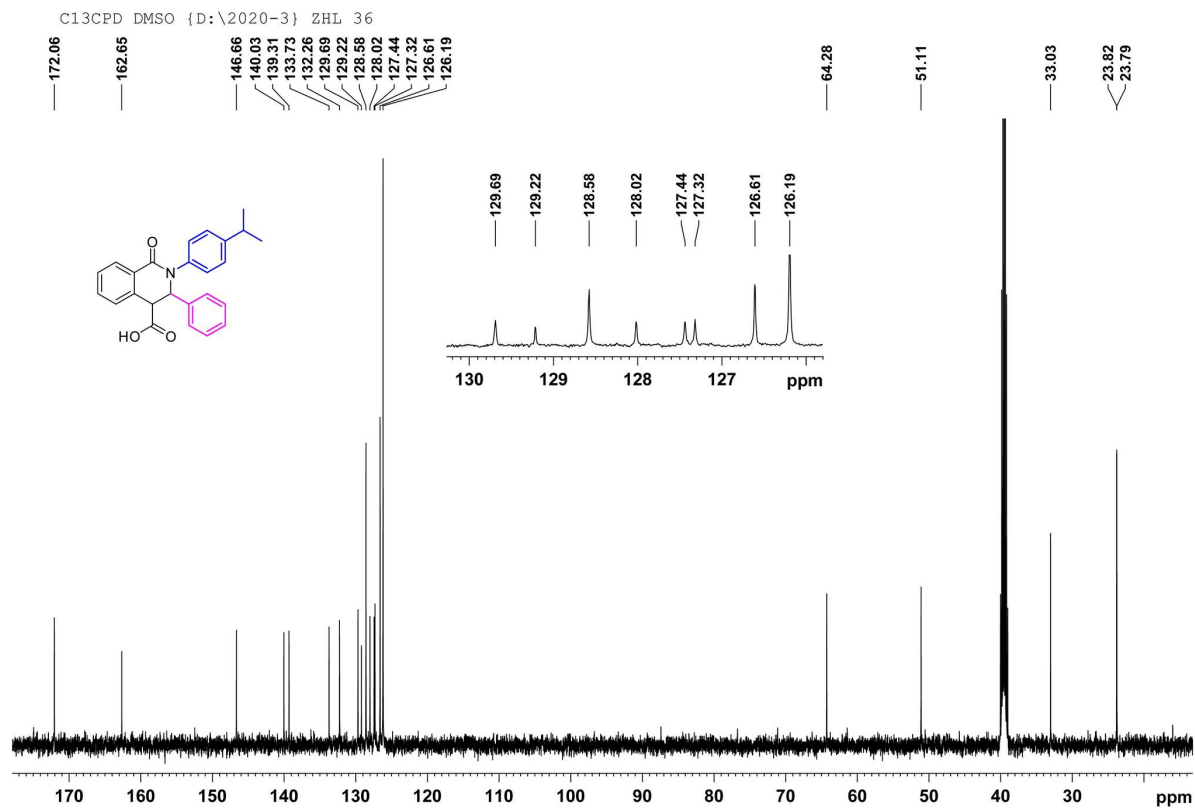

Figure S50. The  $^{13}\text{C}$  NMR spectrum of compound I22

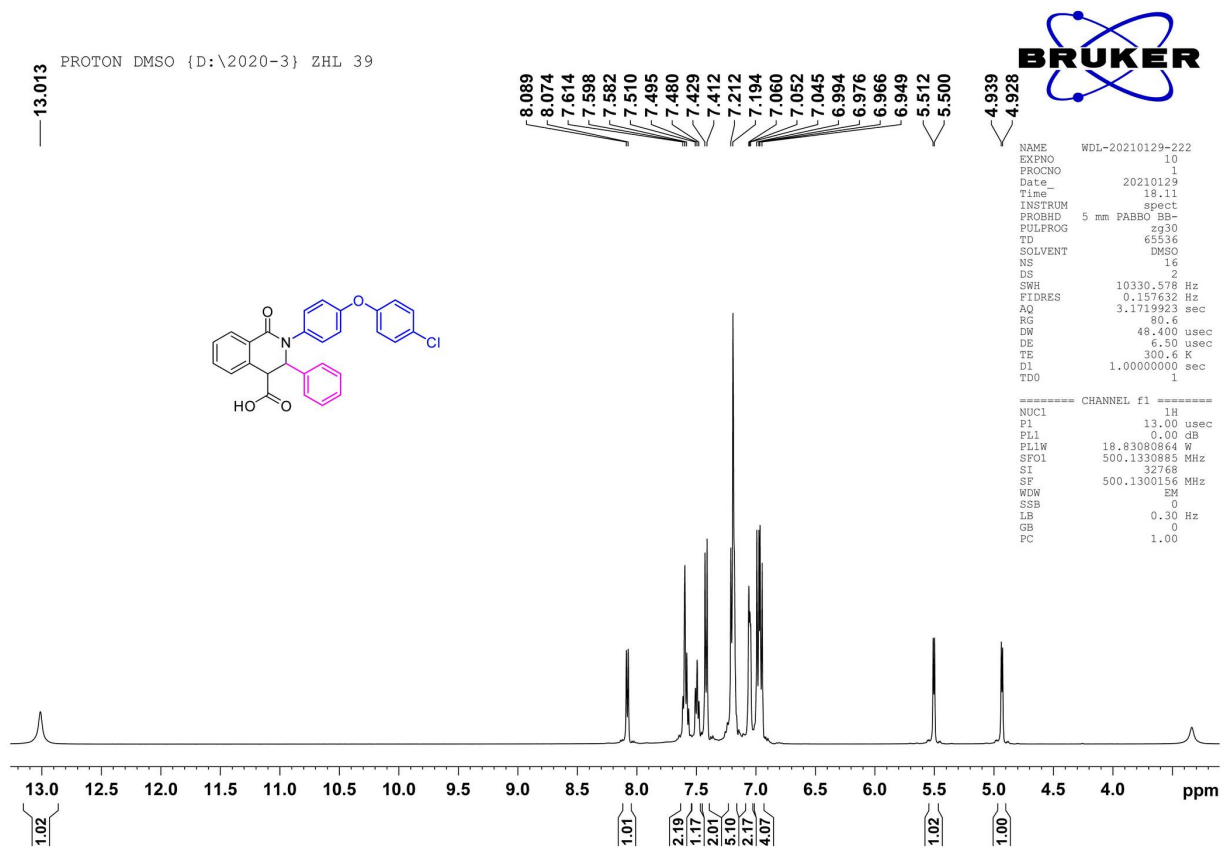

Figure S51. The  $^1\text{H}$  NMR spectrum of compound I23

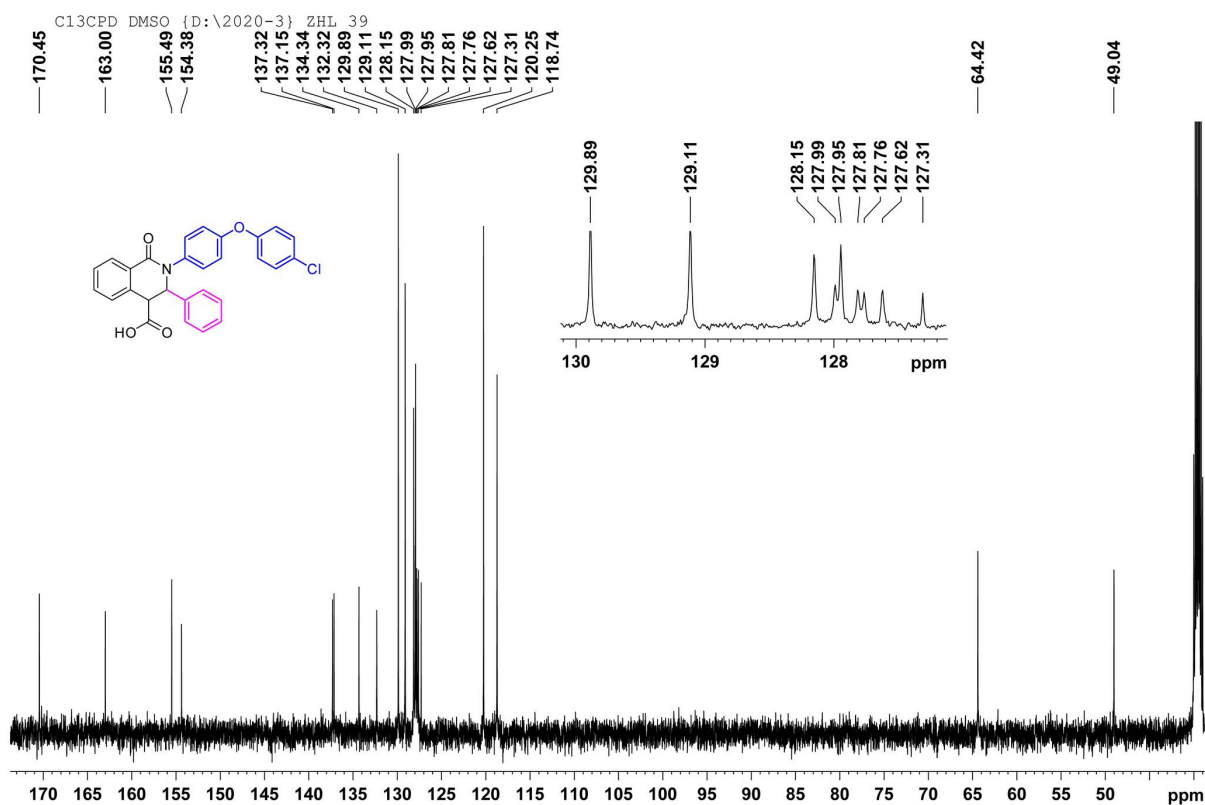

Figure S52. The  $^{13}\text{C}$  NMR spectrum of compound I23



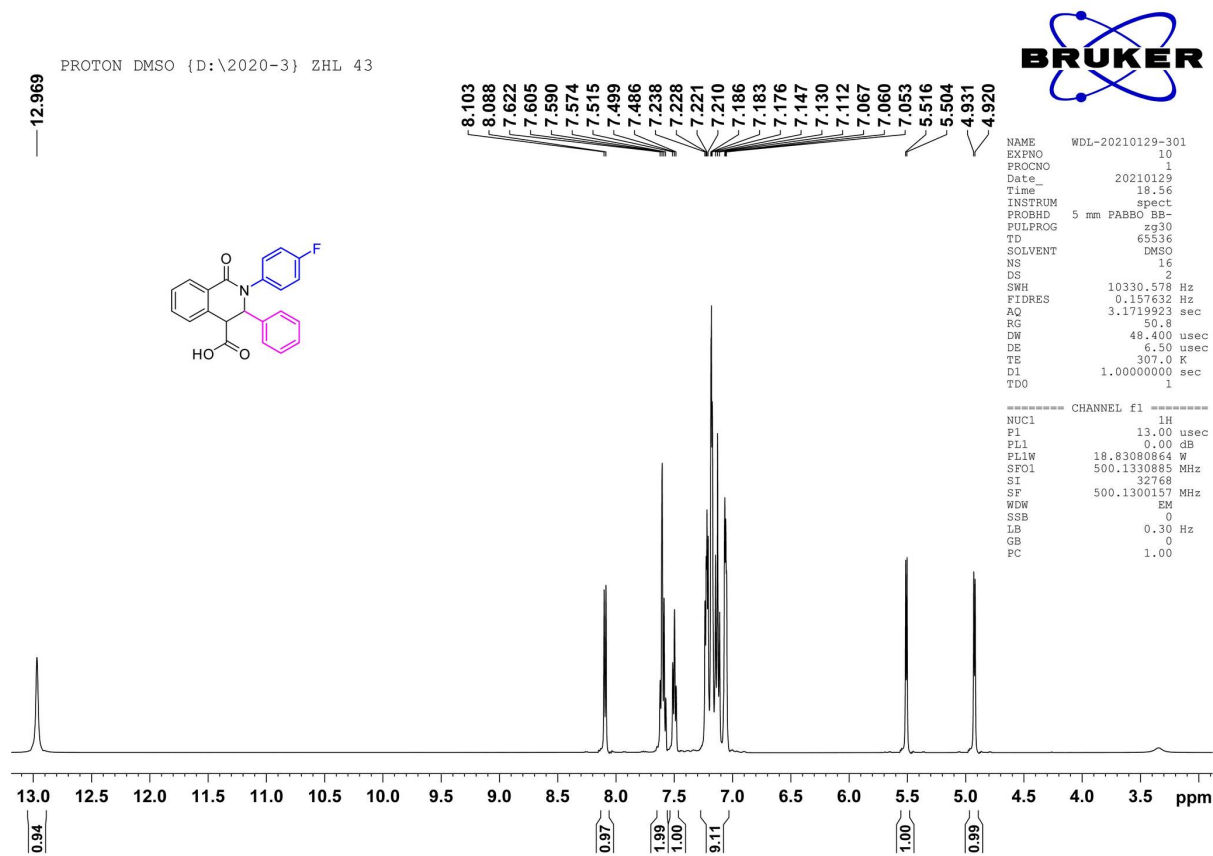

Figure S53. The  $^1\text{H}$  NMR spectrum of compound I24

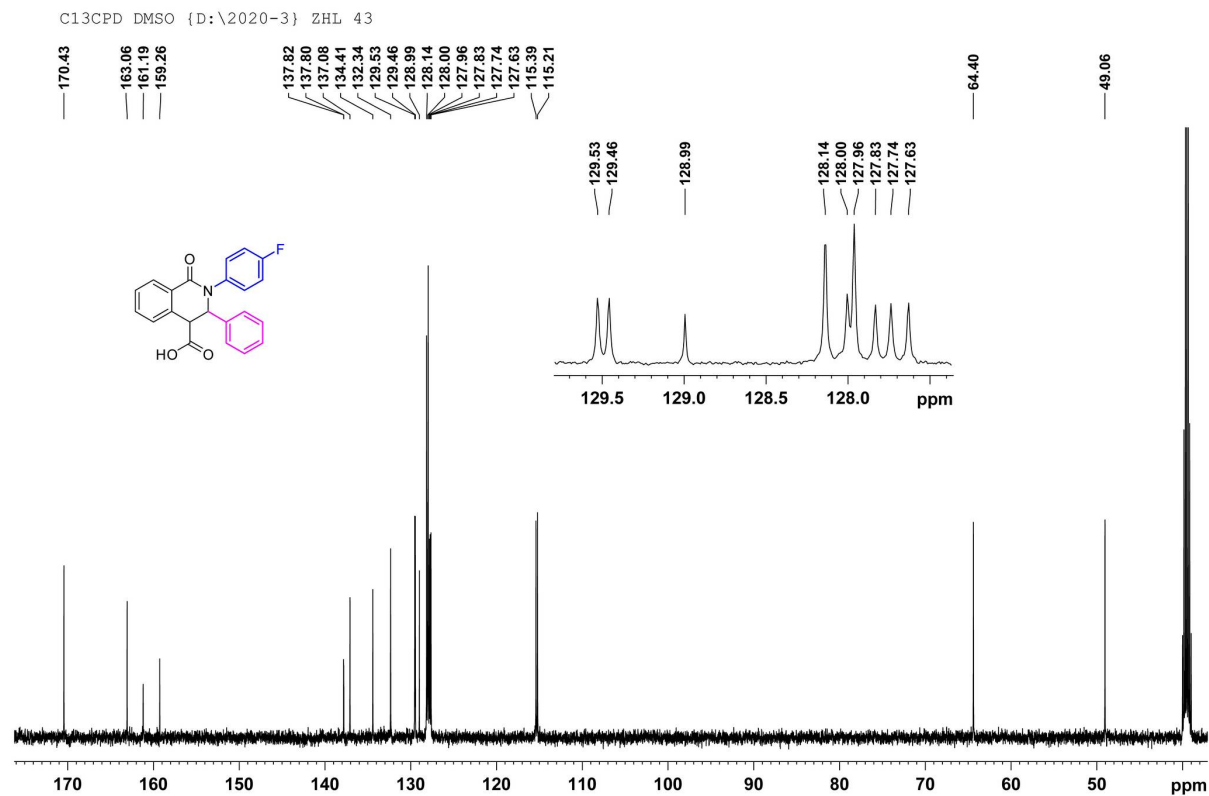

Figure S54. The  $^{13}\text{C}$  NMR spectrum of compound I24

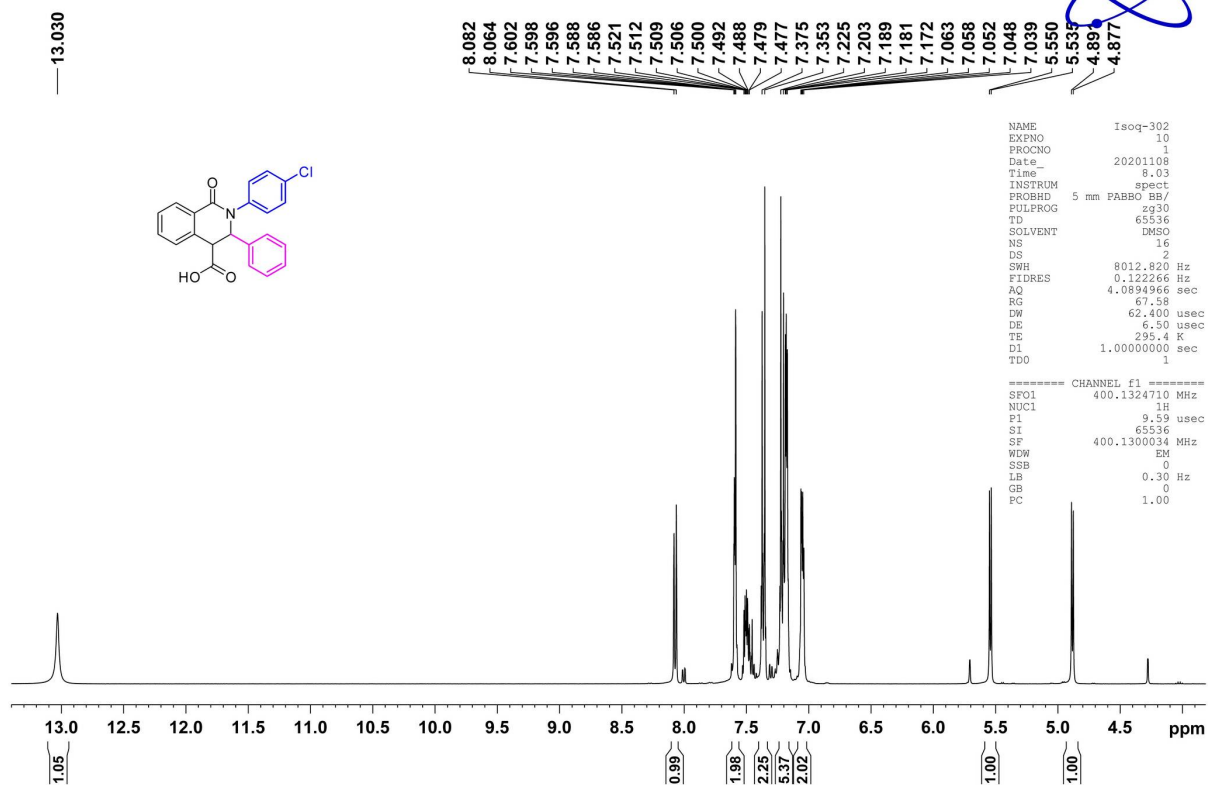

Figure S55. The  $^1\text{H}$  NMR spectrum of compound I25

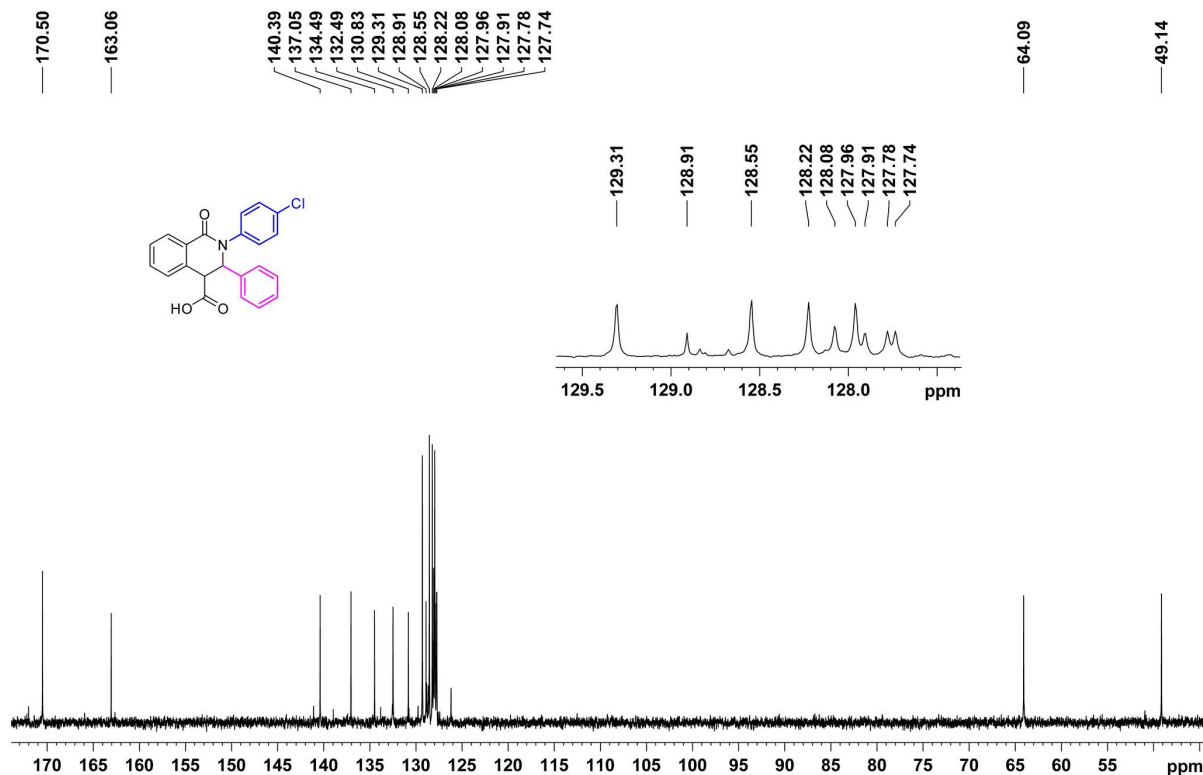

Figure S56. The  $^{13}\text{C}$  NMR spectrum of compound I25

PROTON DMSO {D:\2020-3} ZHL 44

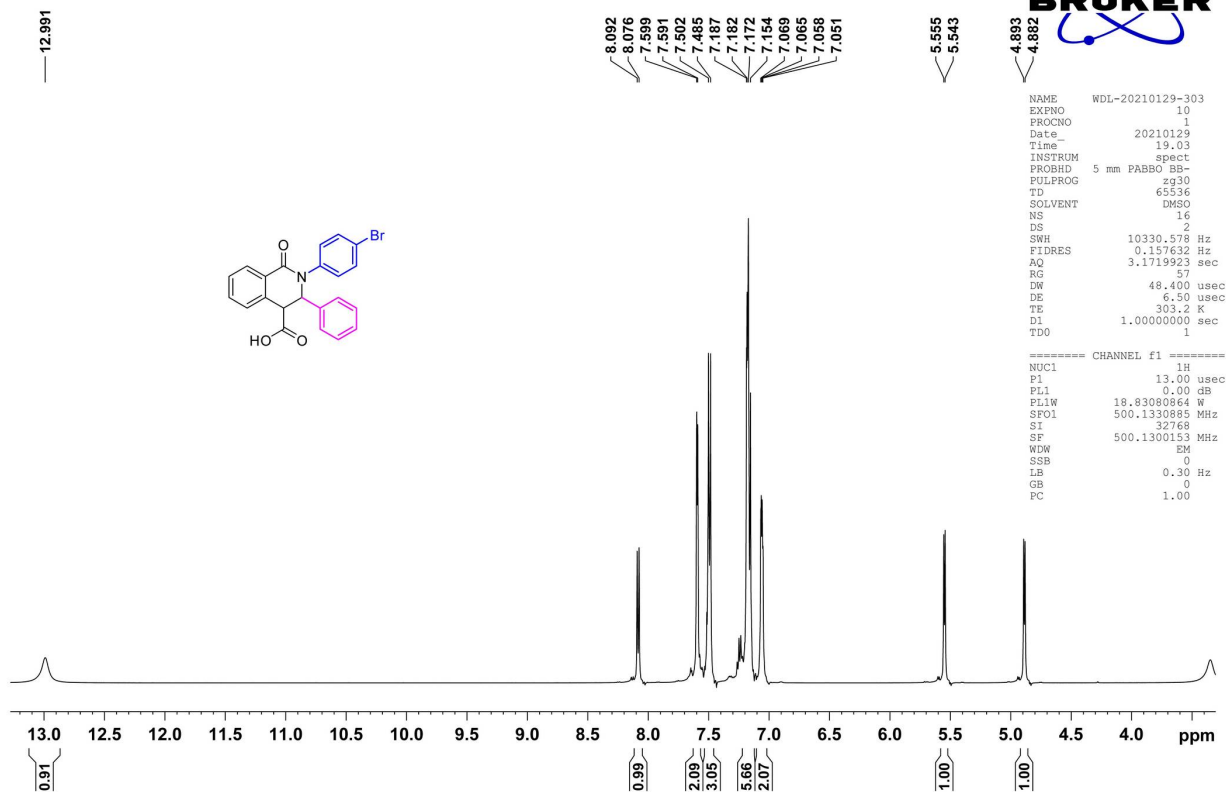

Figure S57. The <sup>1</sup>H NMR spectrum of compound I26

C13CPD DMSO {D:\2020-3} ZHL 44

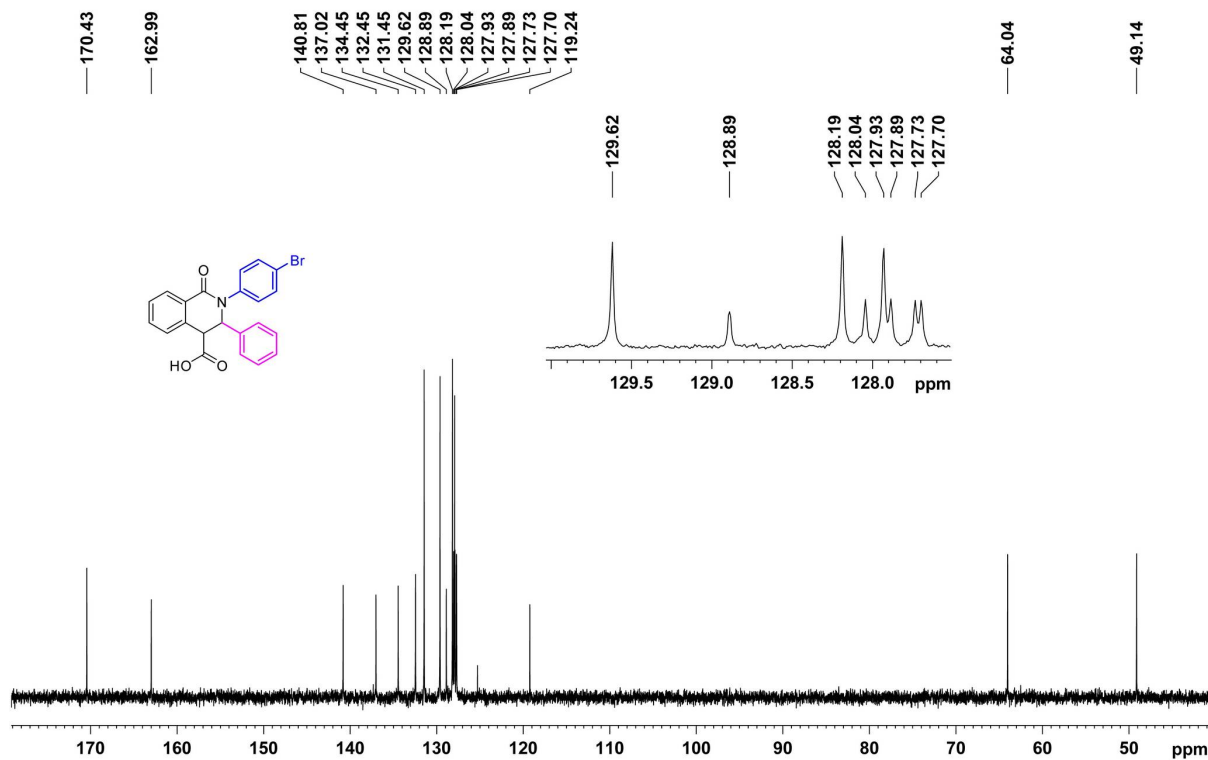

Figure S58. The <sup>13</sup>C NMR spectrum of compound I26

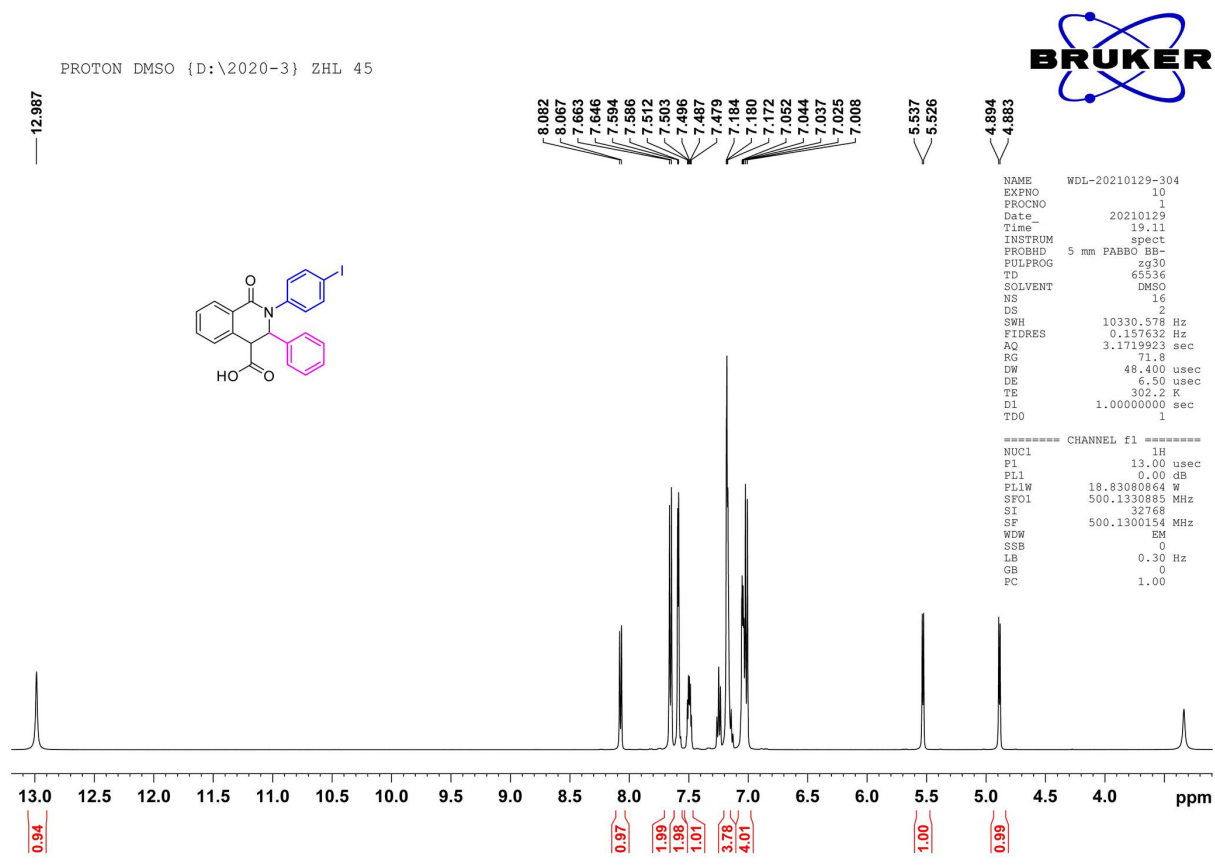

Figure S59. The <sup>1</sup>H NMR spectrum of compound I27

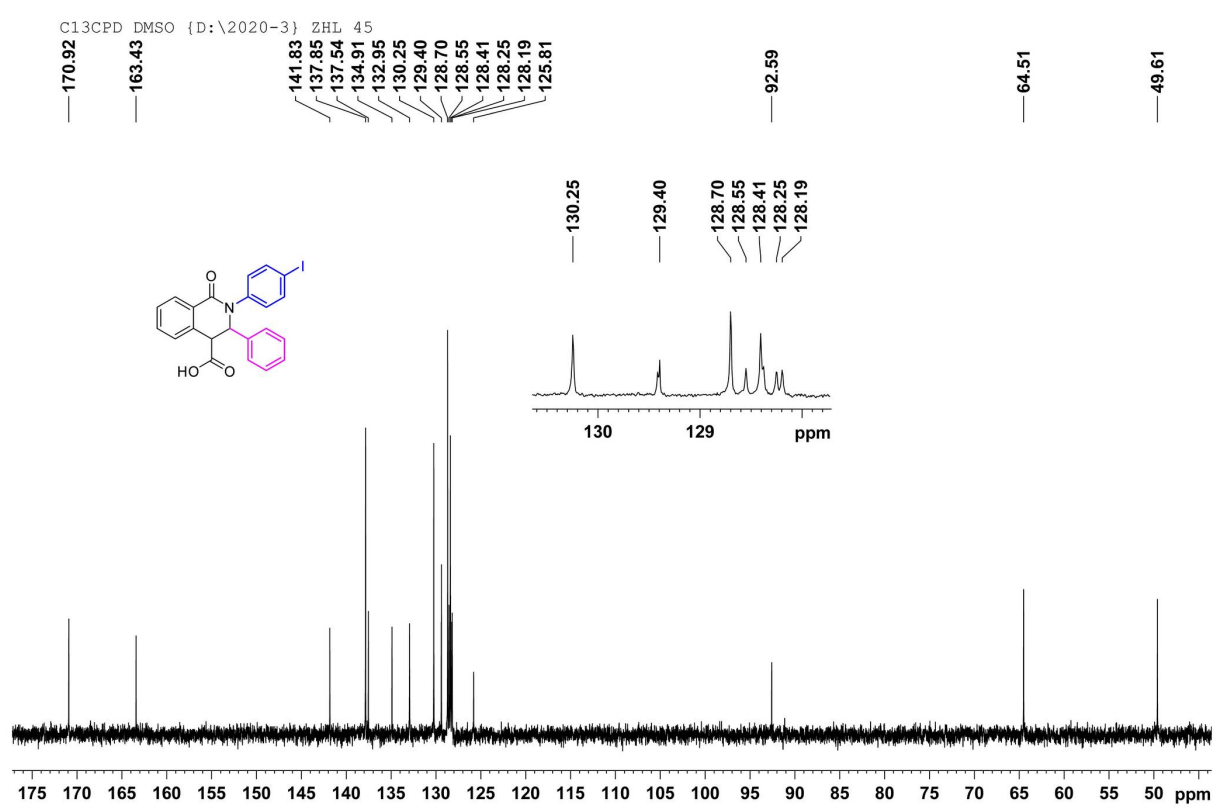

Figure S60. The <sup>13</sup>C NMR spectrum of compound I27

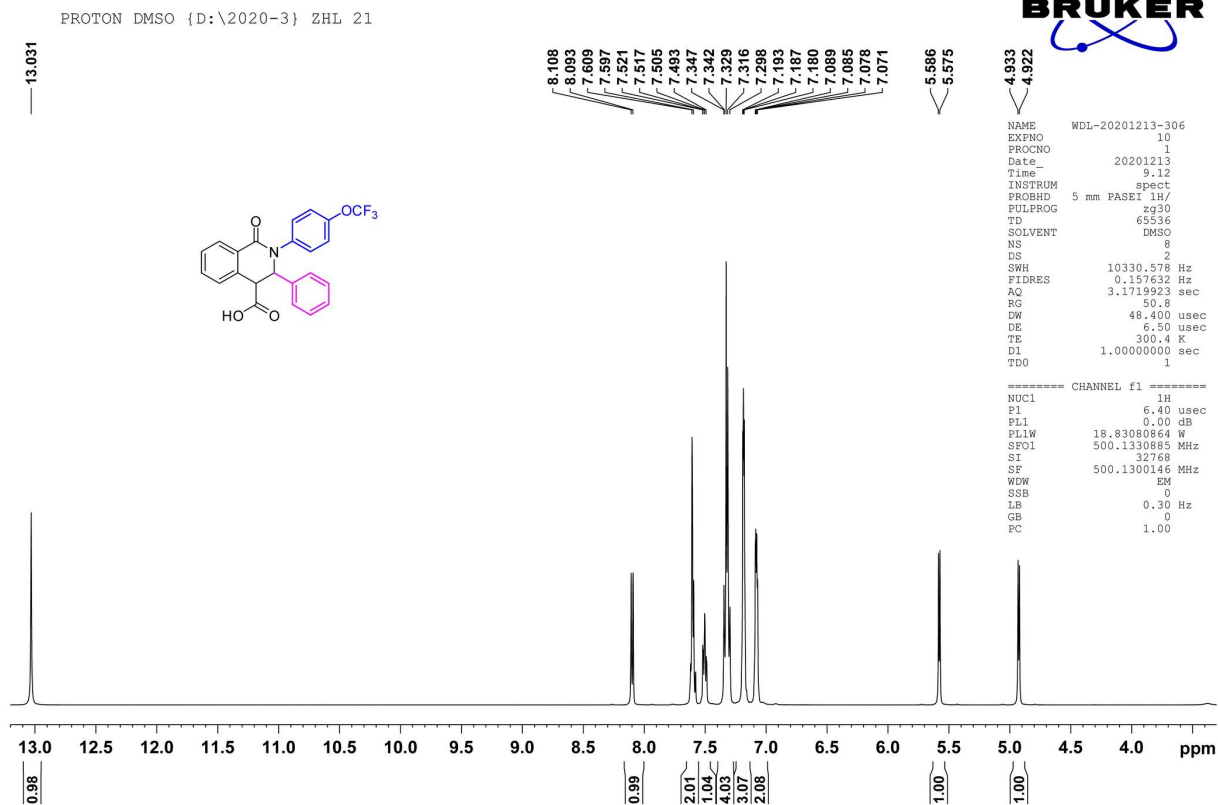

Figure S61. The <sup>1</sup>H NMR spectrum of compound I28

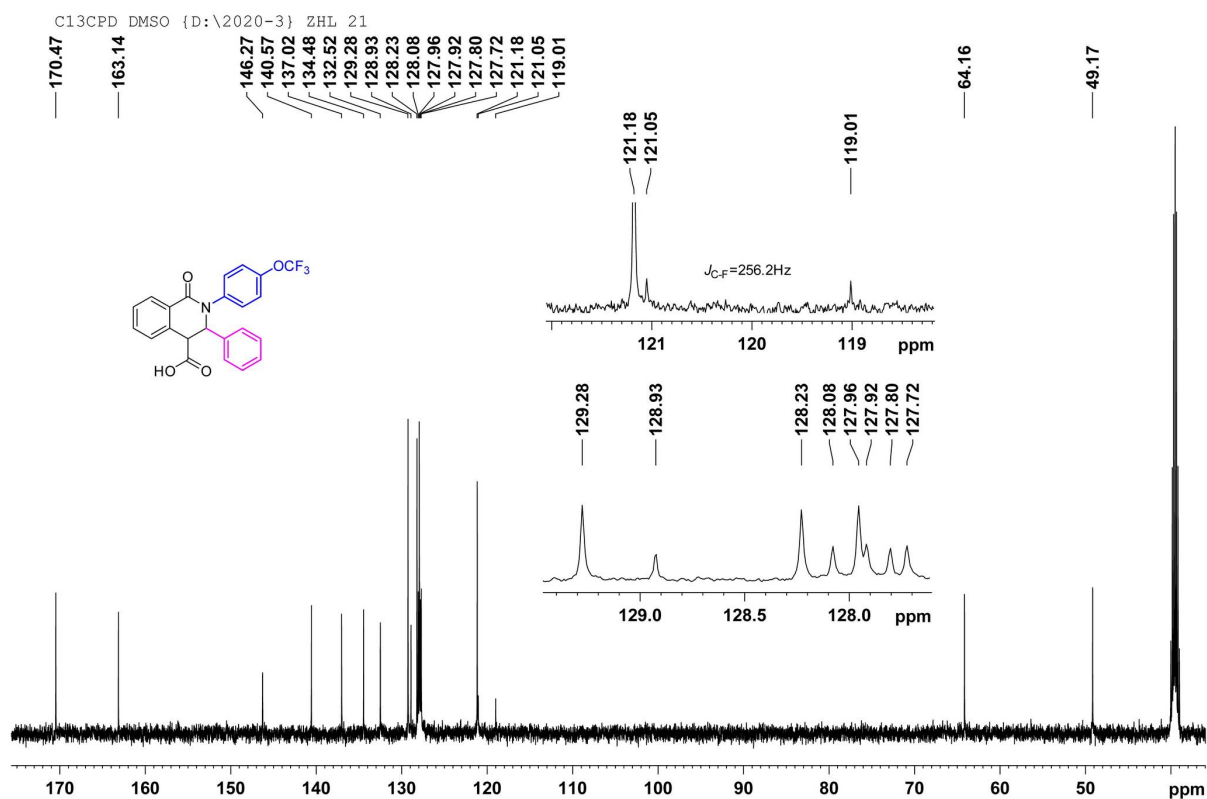

Figure S62. The <sup>13</sup>C NMR spectrum of compound I28

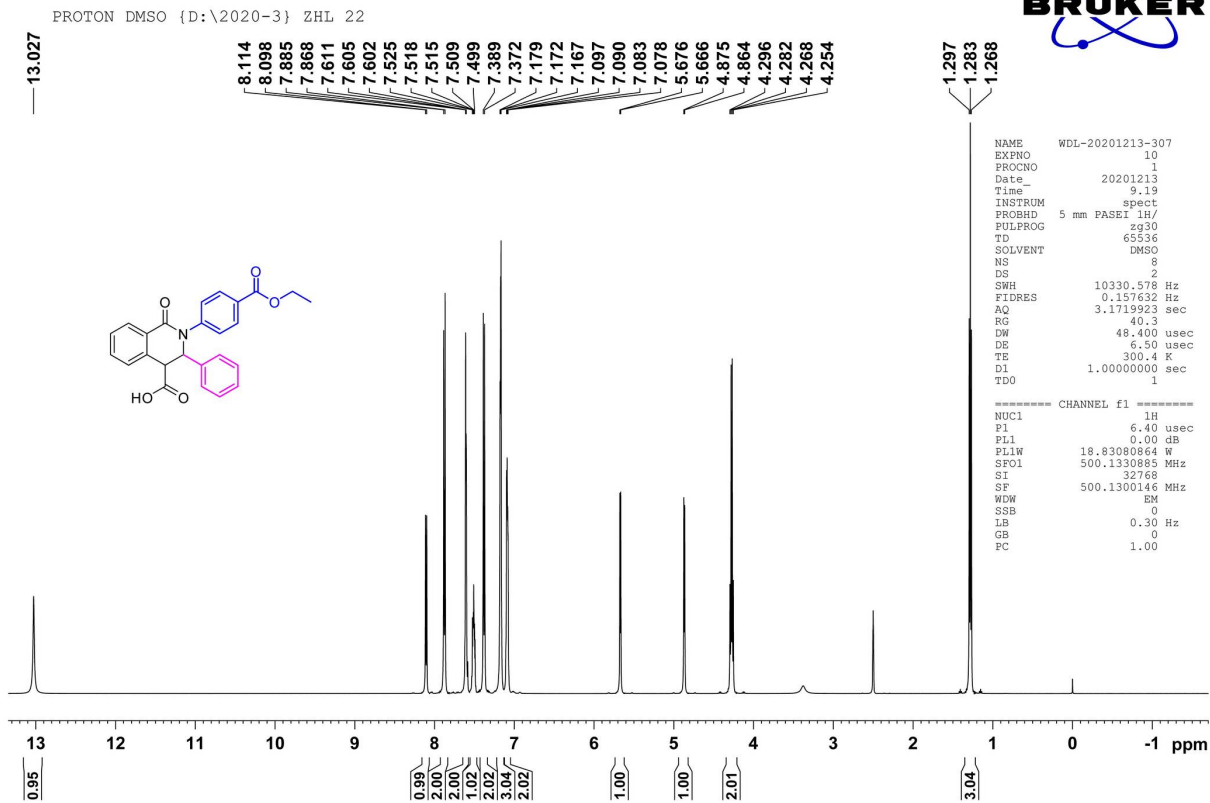

Figure S63. The <sup>1</sup>H NMR spectrum of compound I29

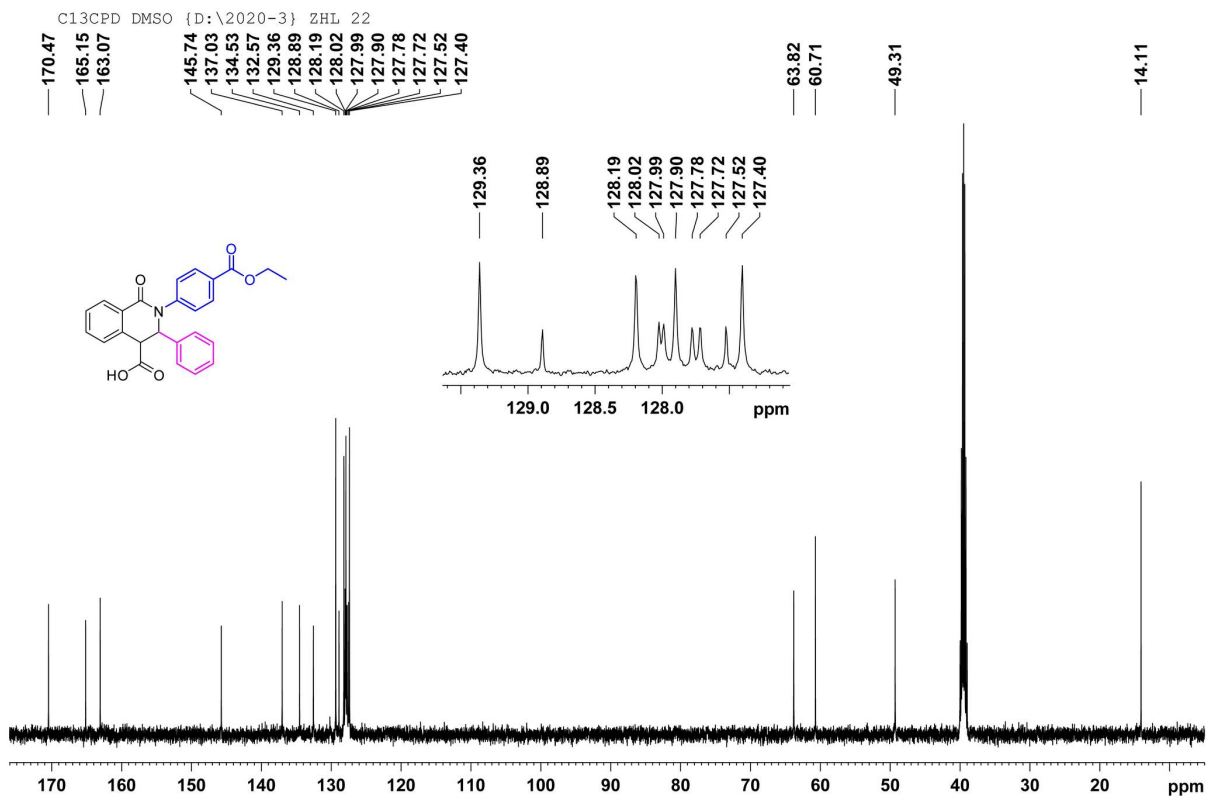

Figure S64. The <sup>13</sup>C NMR spectrum of compound I29

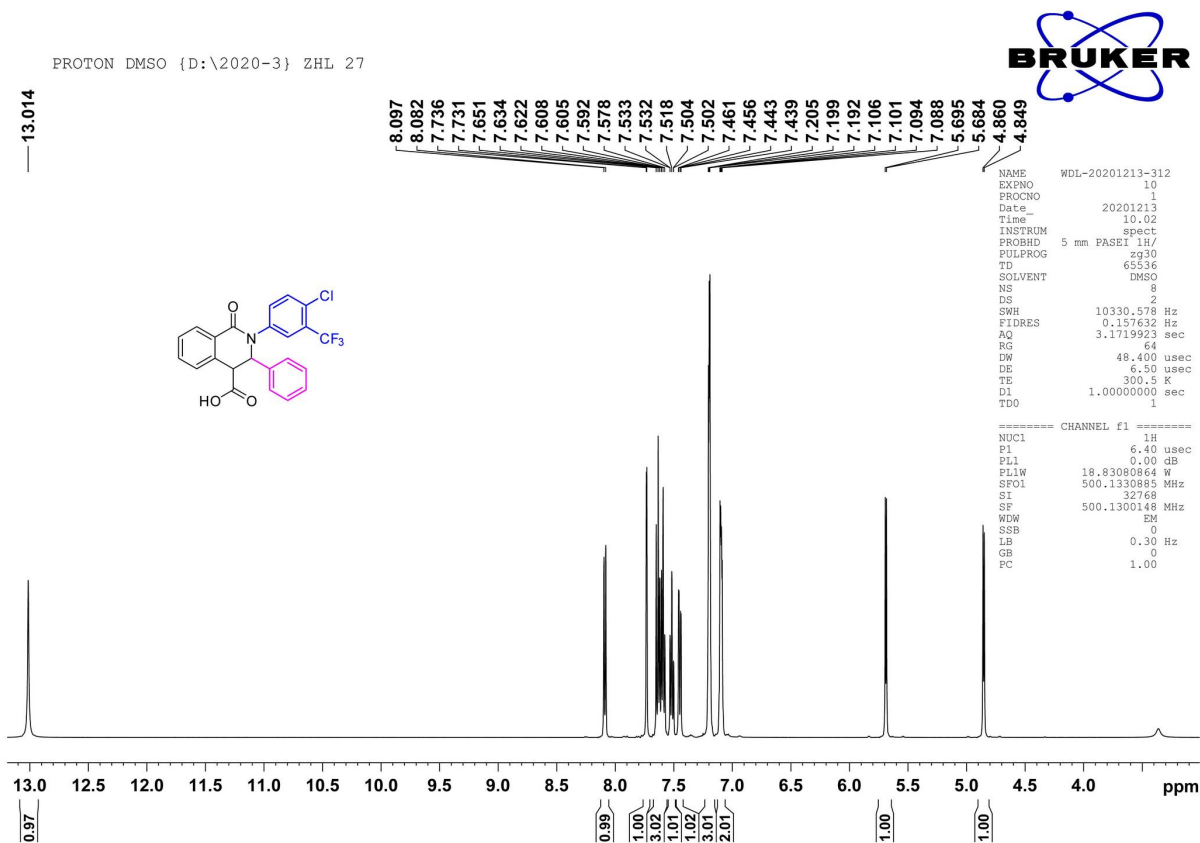

Figure S65. The  $^1\text{H}$  NMR spectrum of compound I30

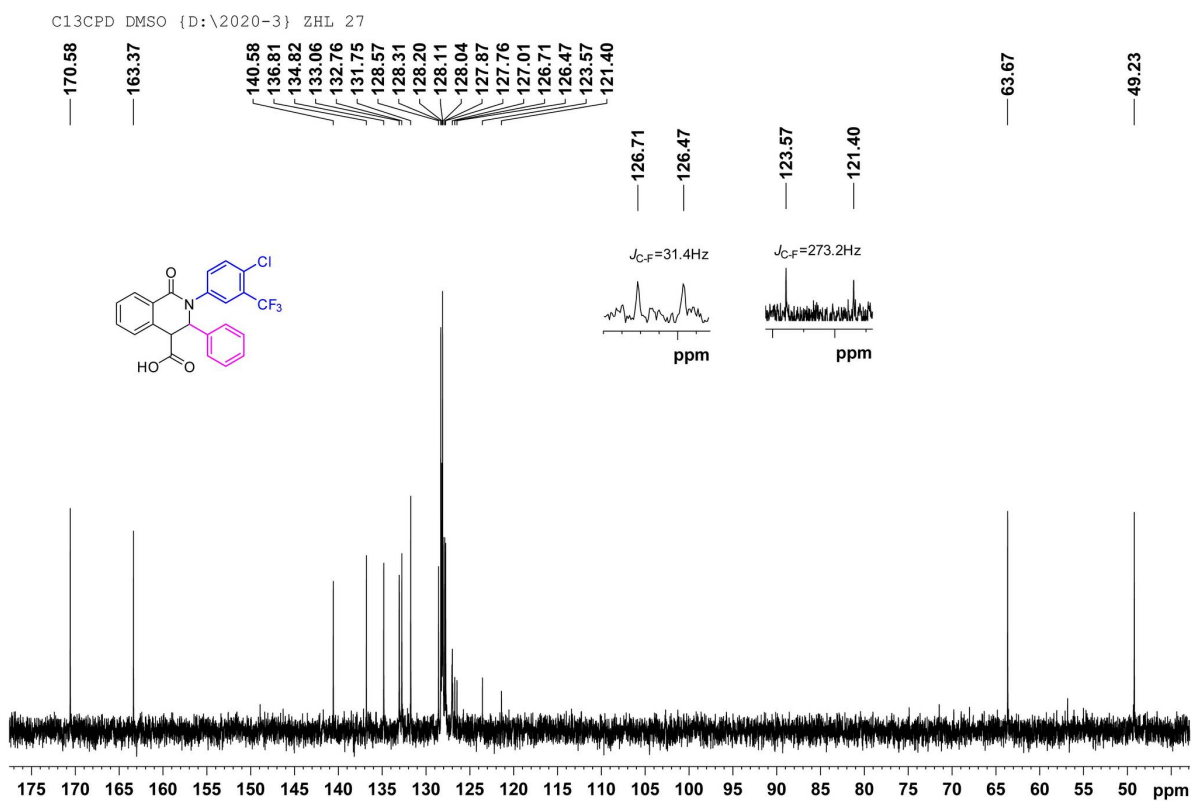

Figure S66. The  $^{13}\text{C}$  NMR spectrum of compound I30

13.028

PROTON DMSO {D:\2020-3} ZHL 28

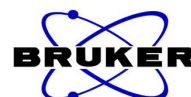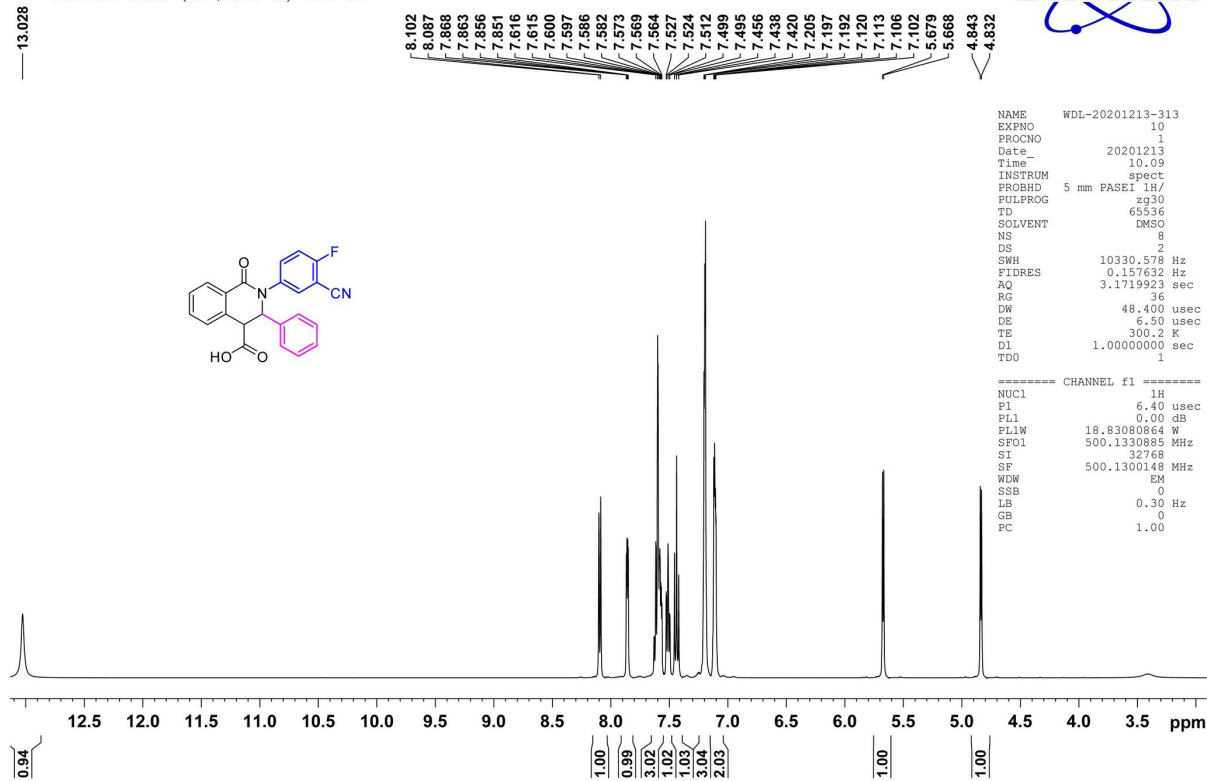Figure S67. The <sup>1</sup>H NMR spectrum of compound I31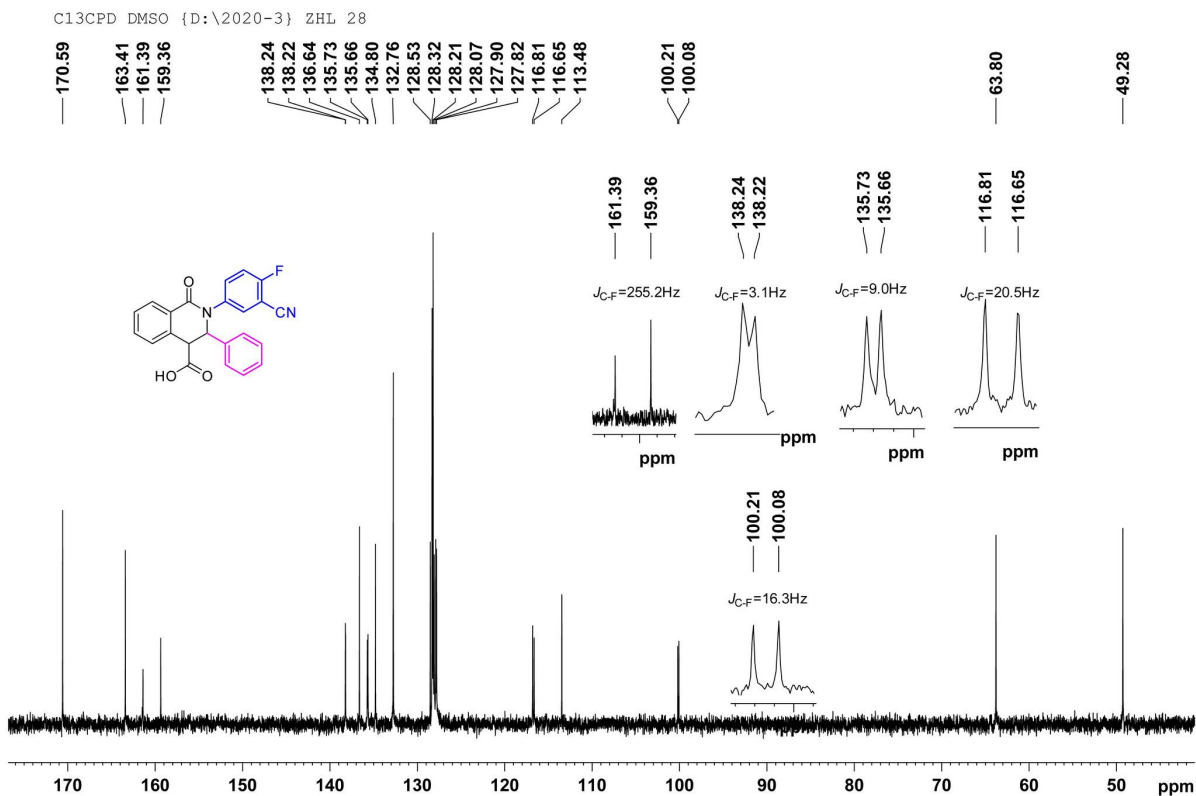Figure S68. The <sup>13</sup>C NMR spectrum of compound I31



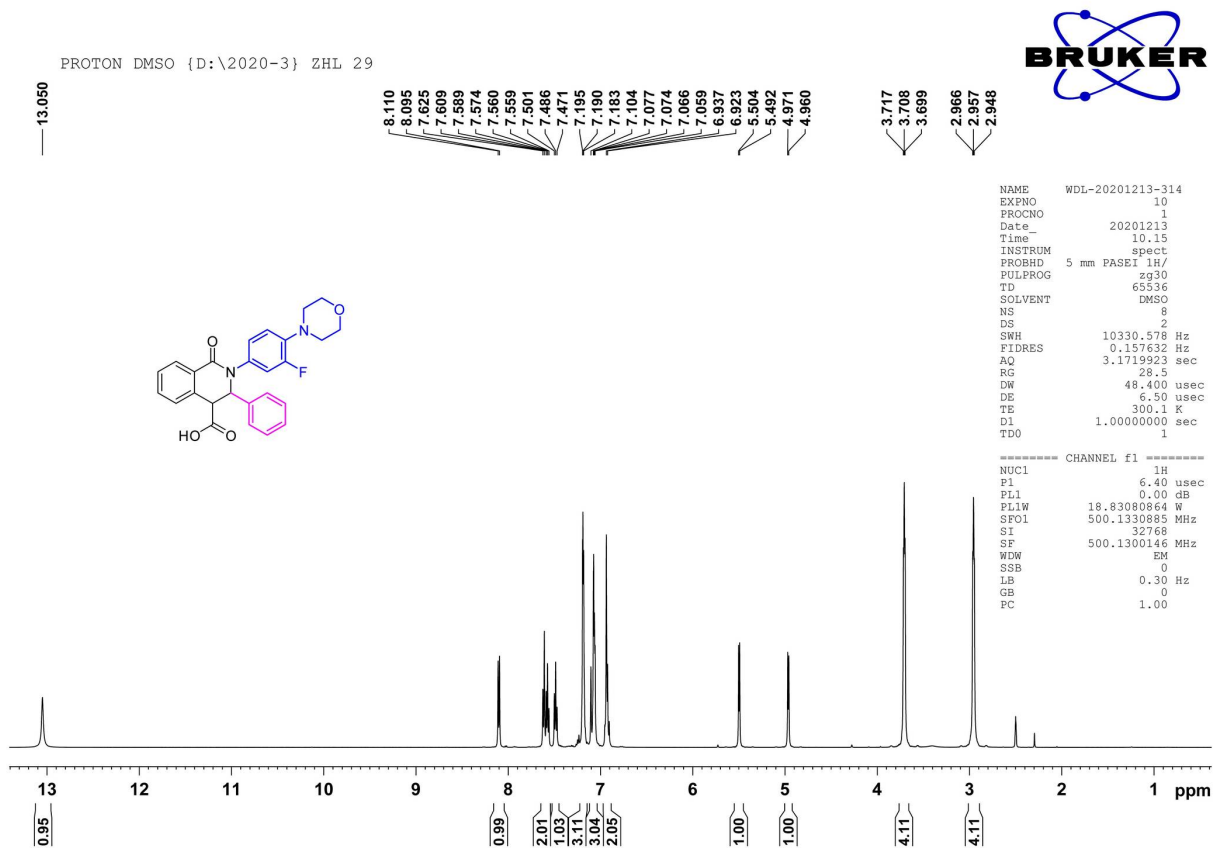

Figure S69. The  $^1\text{H}$  NMR spectrum of compound I32

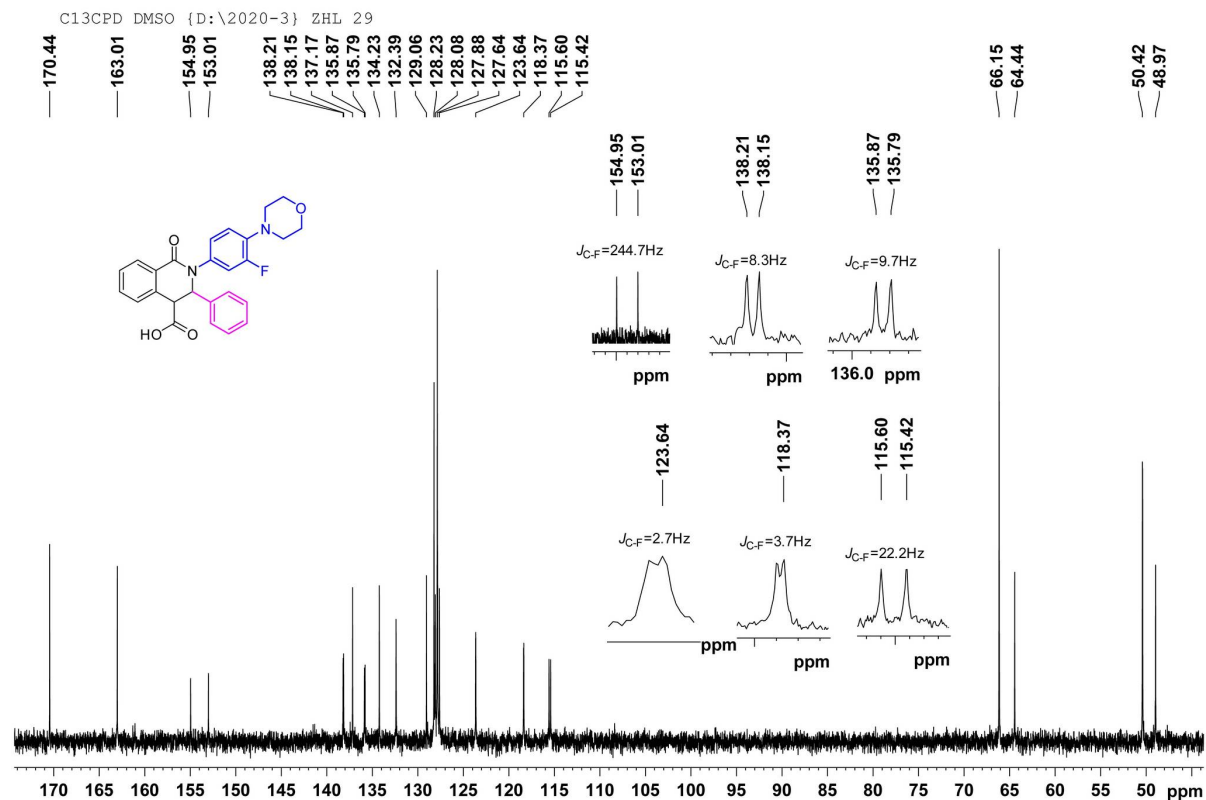

Figure S70. The  $^{13}\text{C}$  NMR spectrum of compound I32

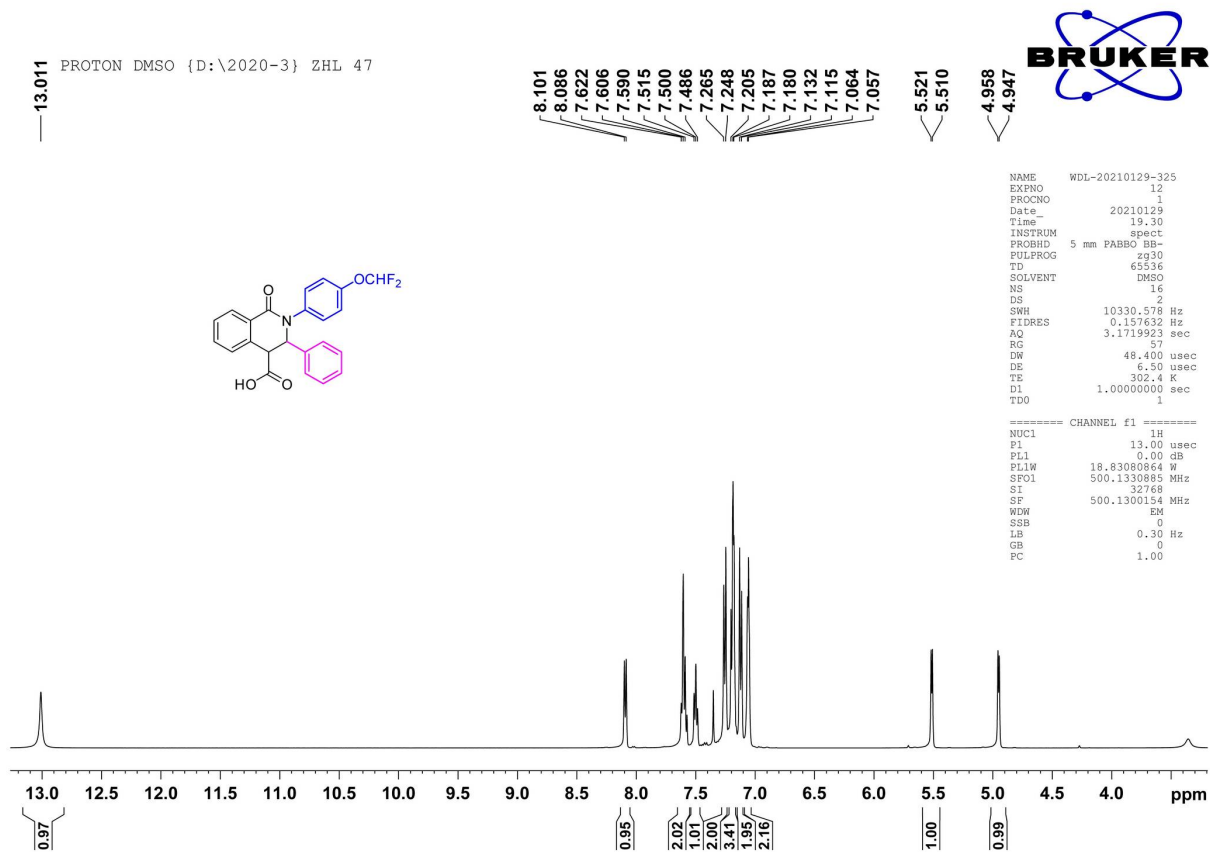

Figure S71. The <sup>1</sup>H NMR spectrum of compound I33

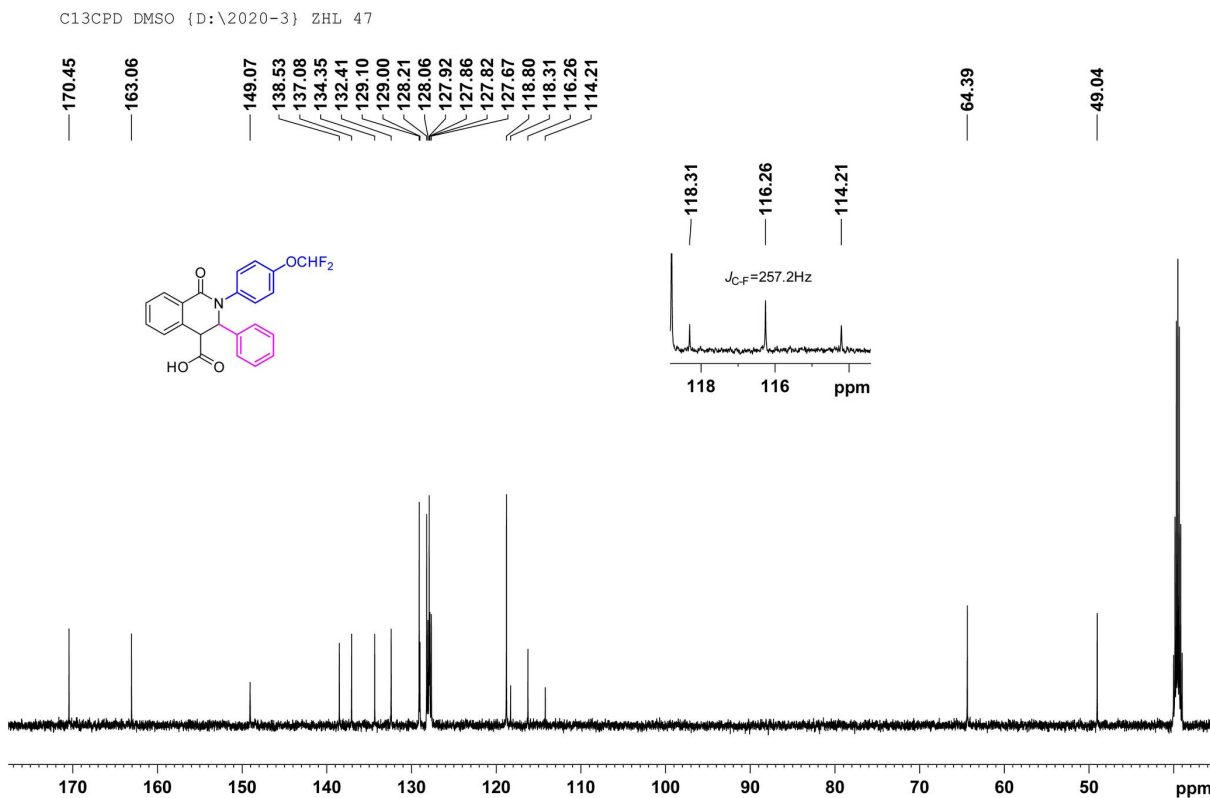

Figure S72. The <sup>13</sup>C NMR spectrum of compound I33

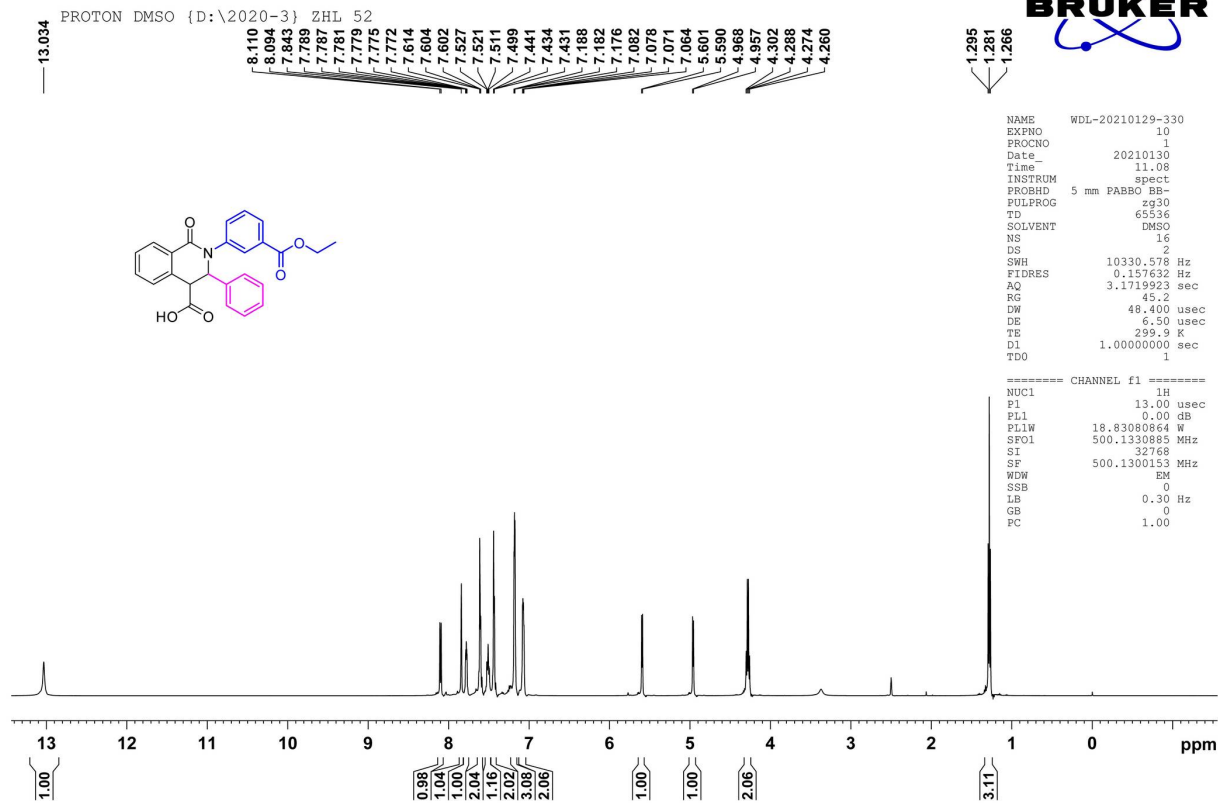

Figure S73. The  $^1\text{H}$  NMR spectrum of compound I34

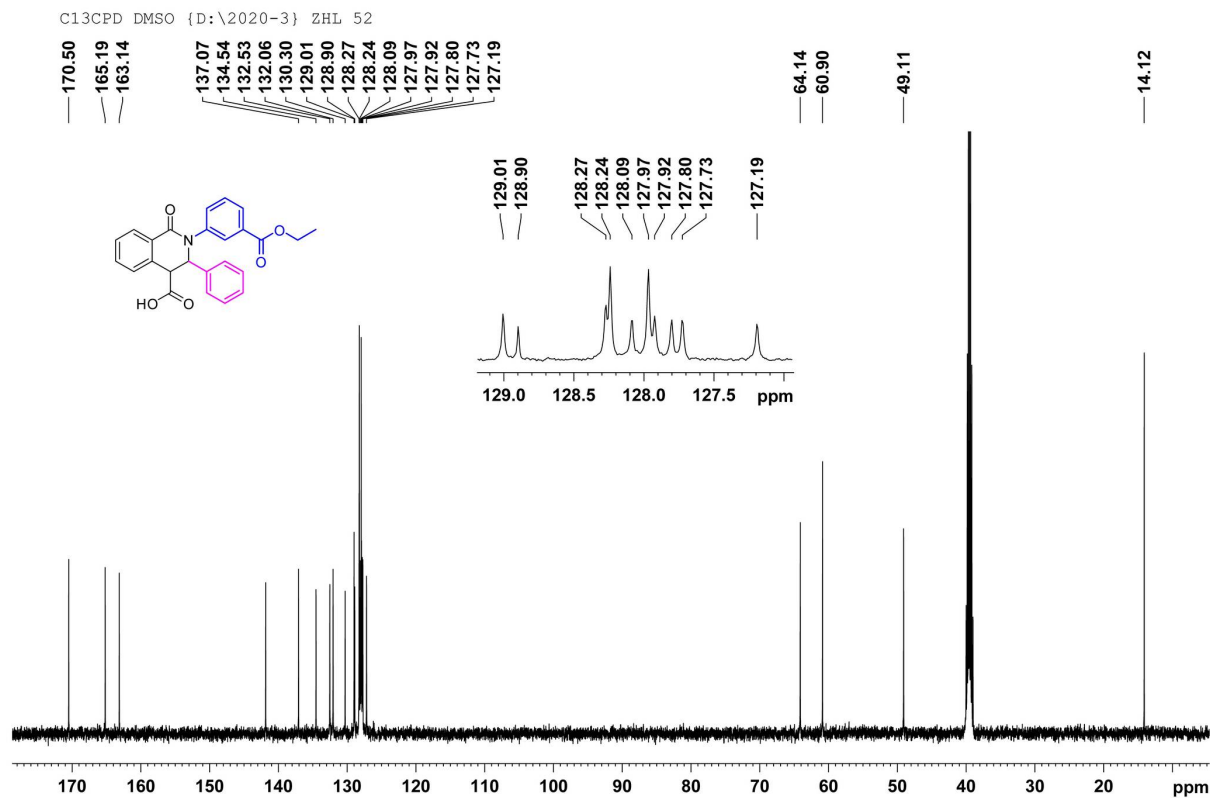

Figure S74. The  $^{13}\text{C}$  NMR spectrum of compound I34

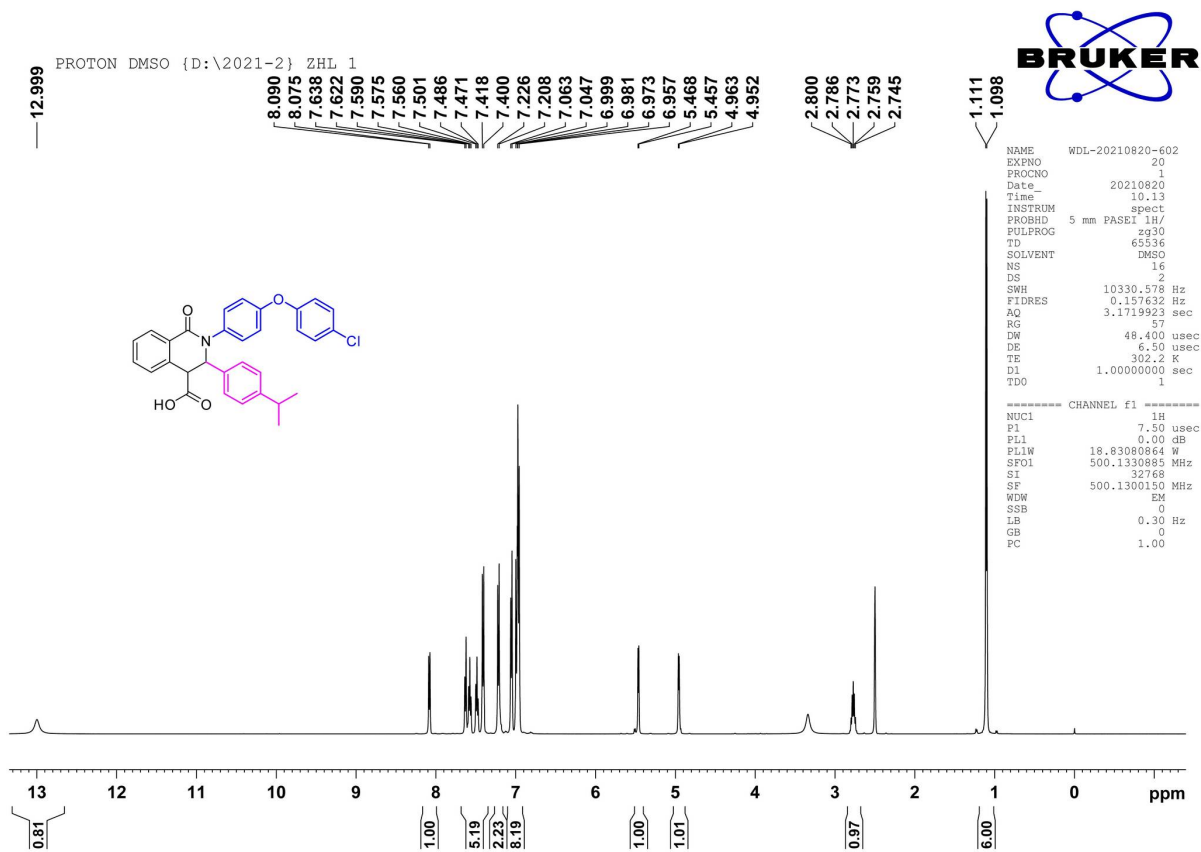

Figure S75. The  $^1\text{H}$  NMR spectrum of compound III1

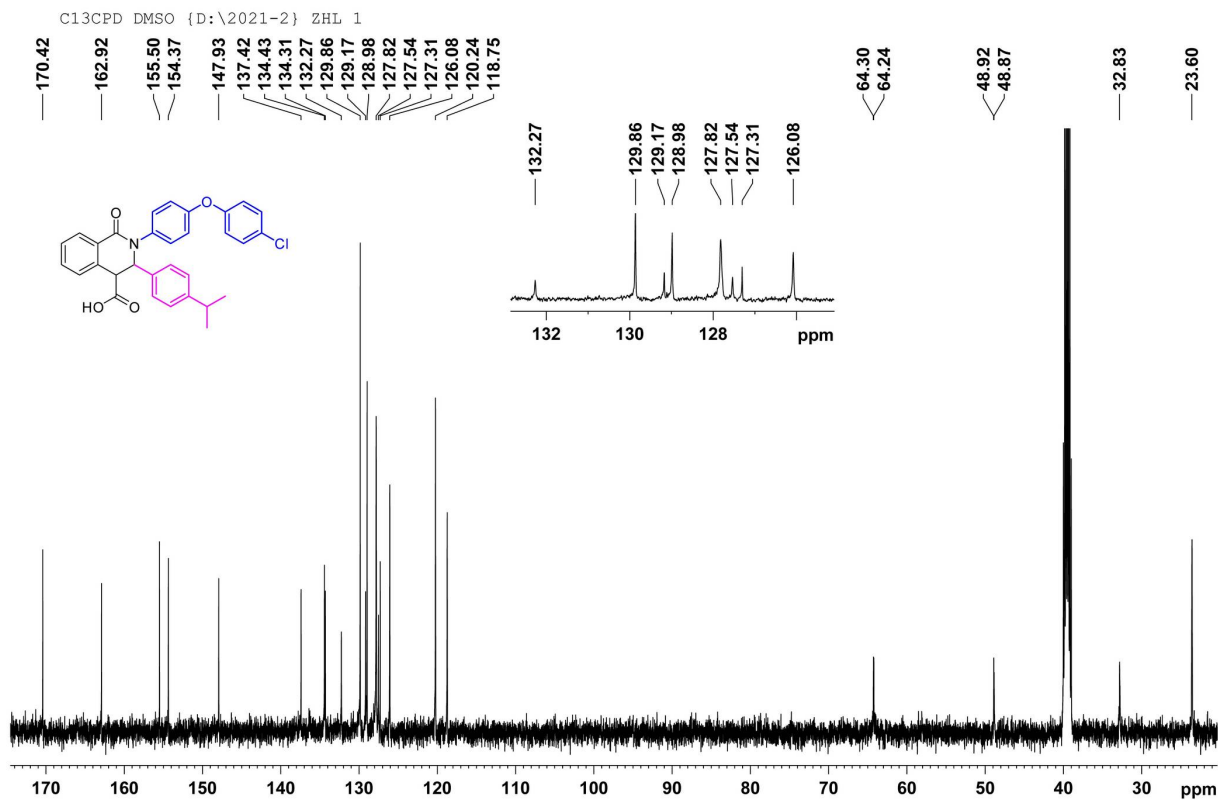

Figure S76. The  $^{13}\text{C}$  NMR spectrum of compound III1

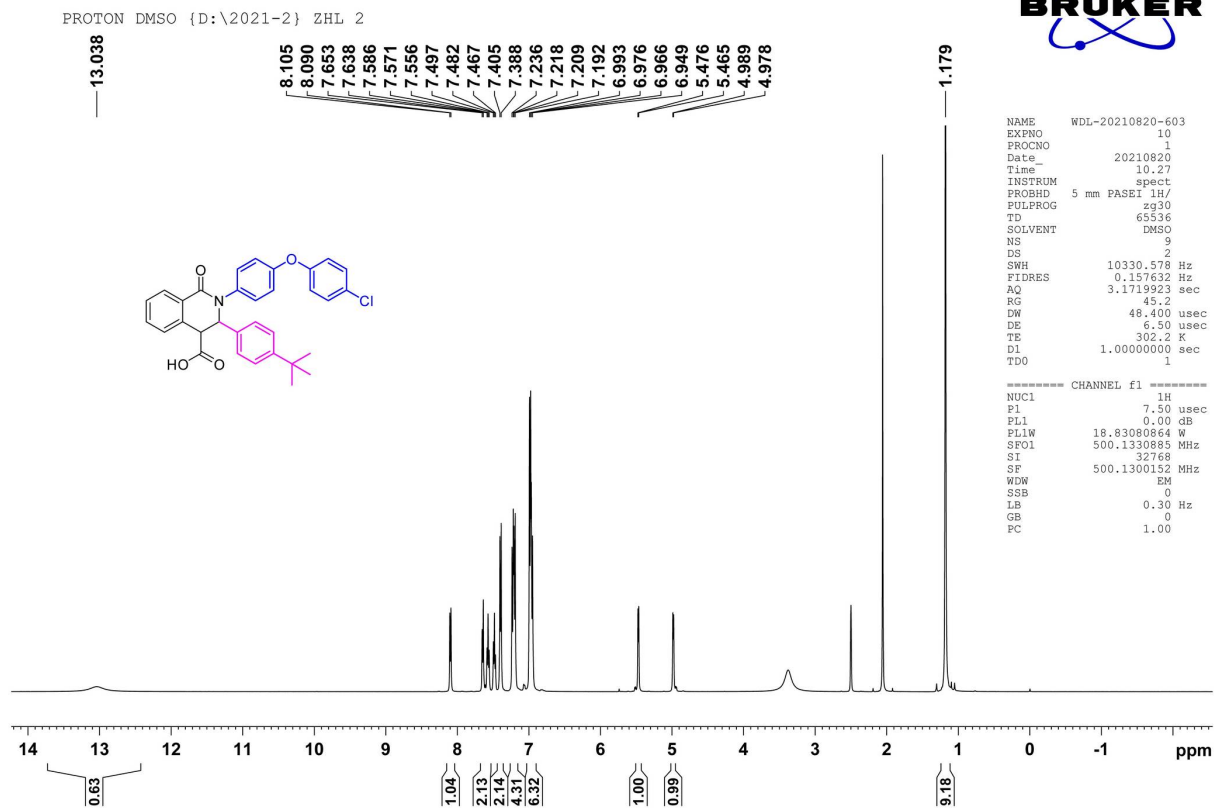

Figure S77. The  $^1\text{H}$  NMR spectrum of compound II2

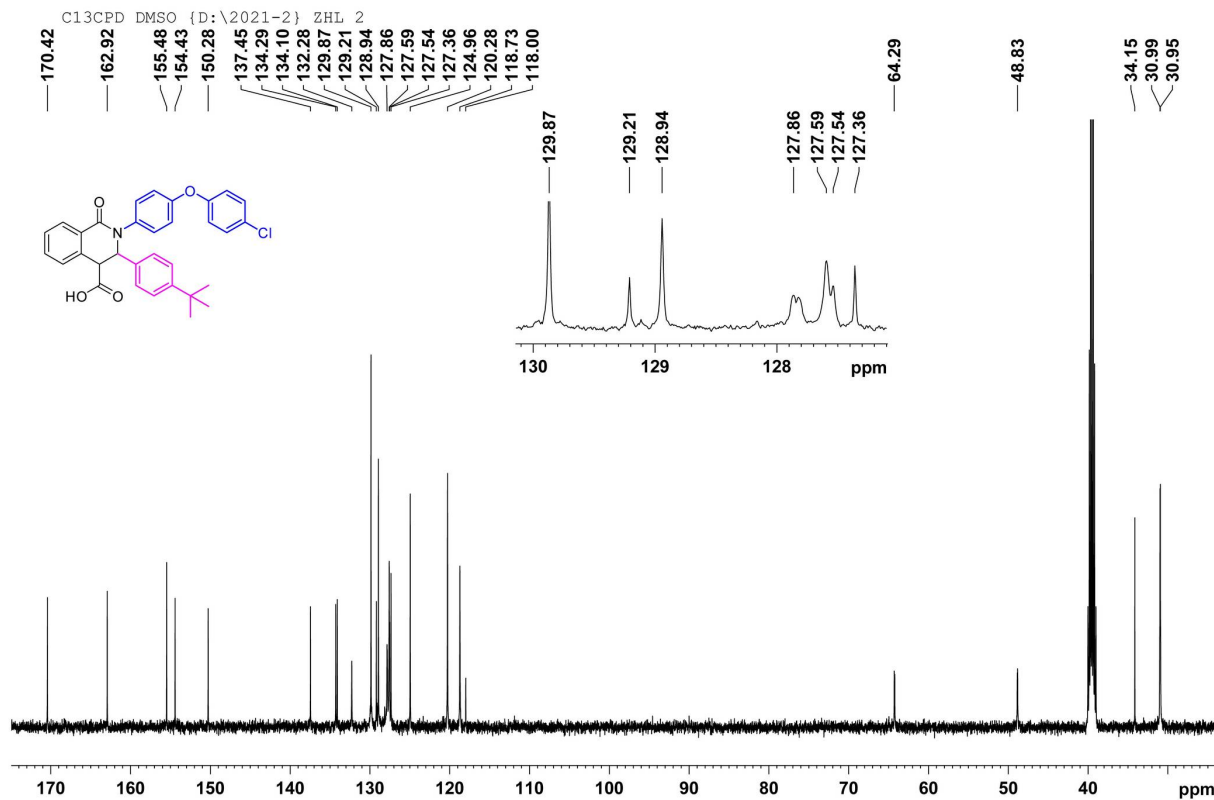

Figure S78. The  $^{13}\text{C}$  NMR spectrum of compound II2

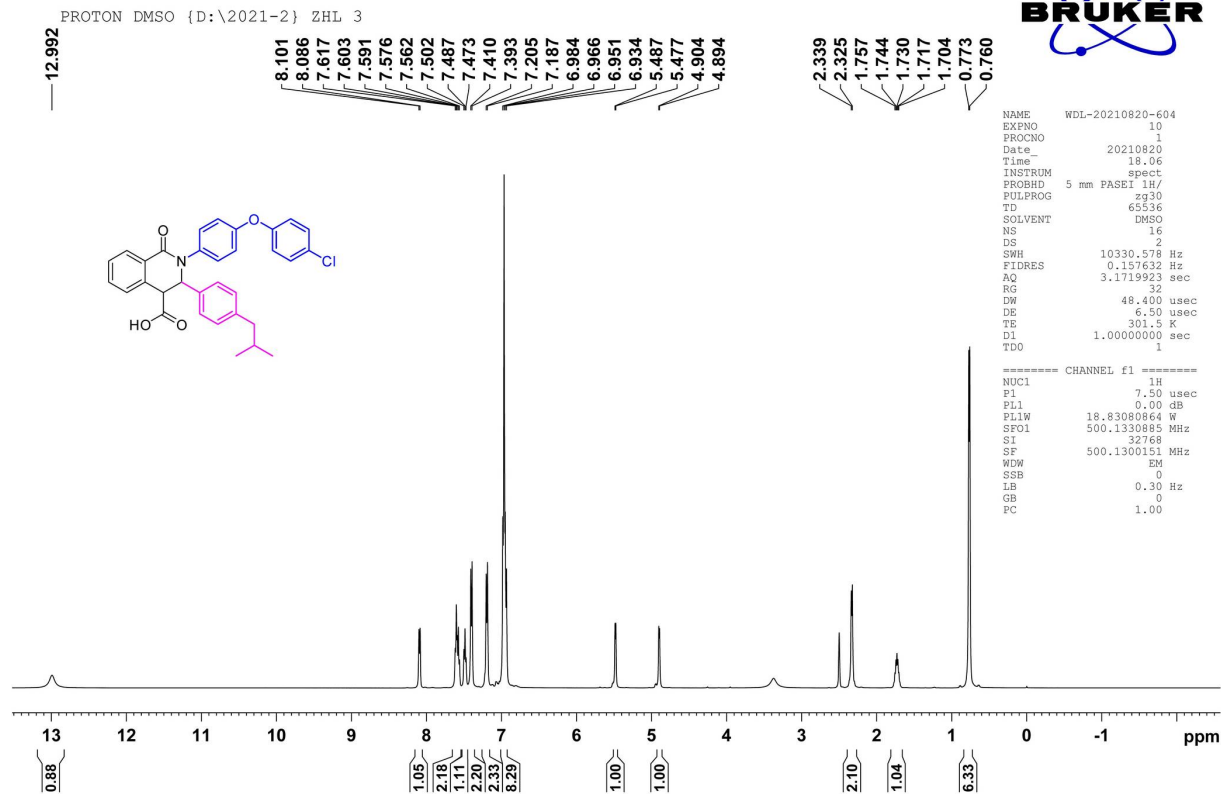

Figure S79. The  $^1\text{H}$  NMR spectrum of compound II3

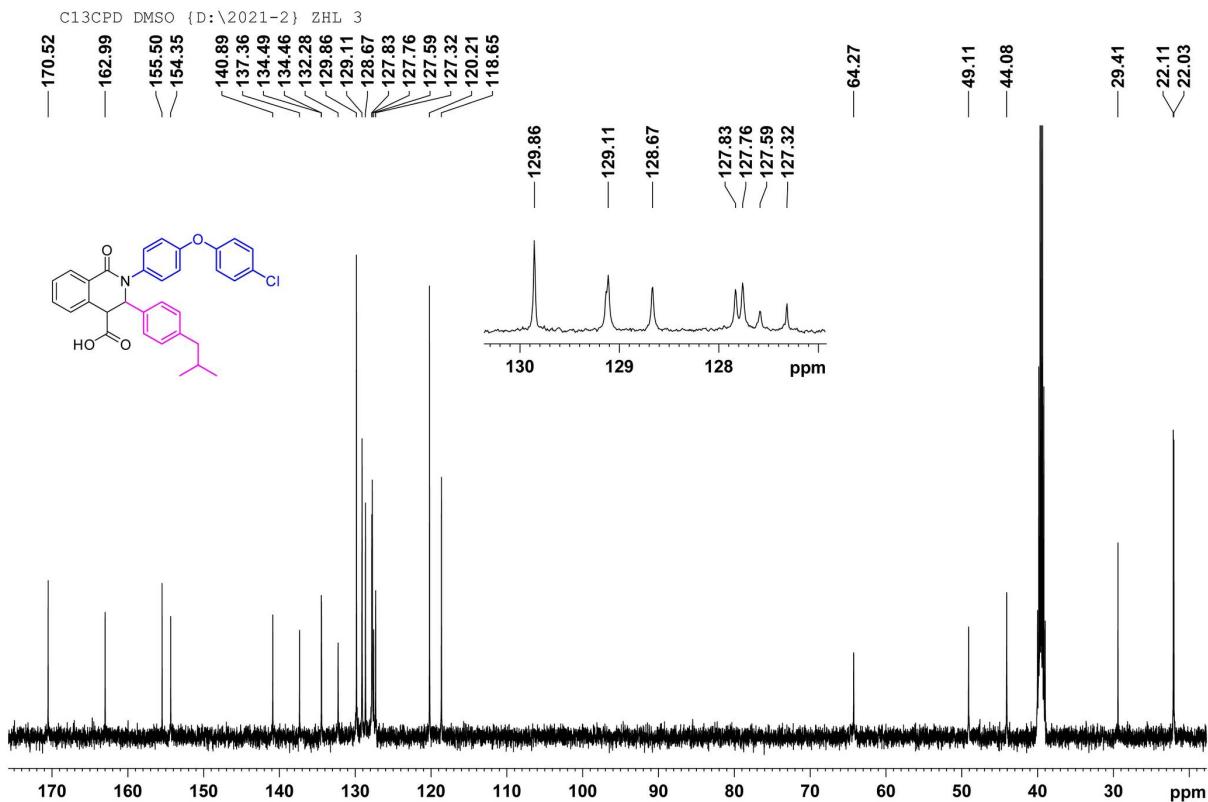

Figure S80. The  $^{13}\text{C}$  NMR spectrum of compound II3

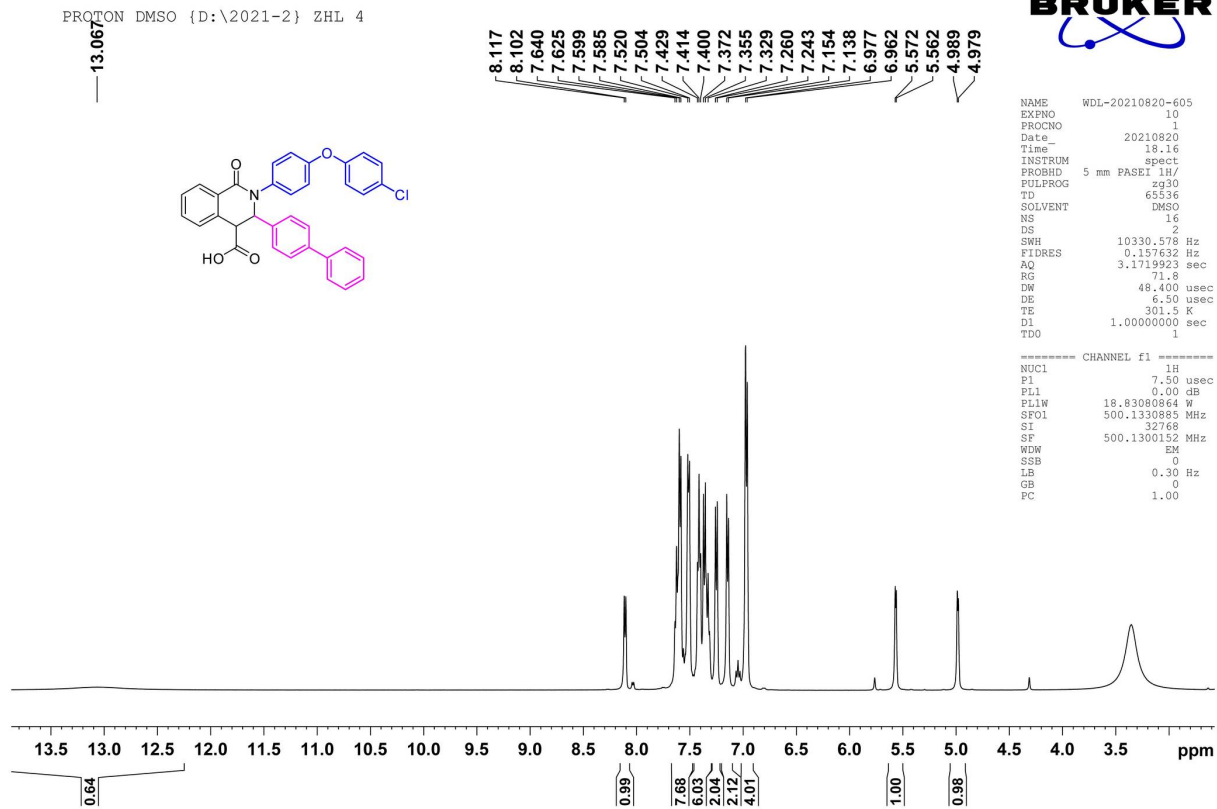

Figure S81. The  $^1\text{H}$  NMR spectrum of compound II4

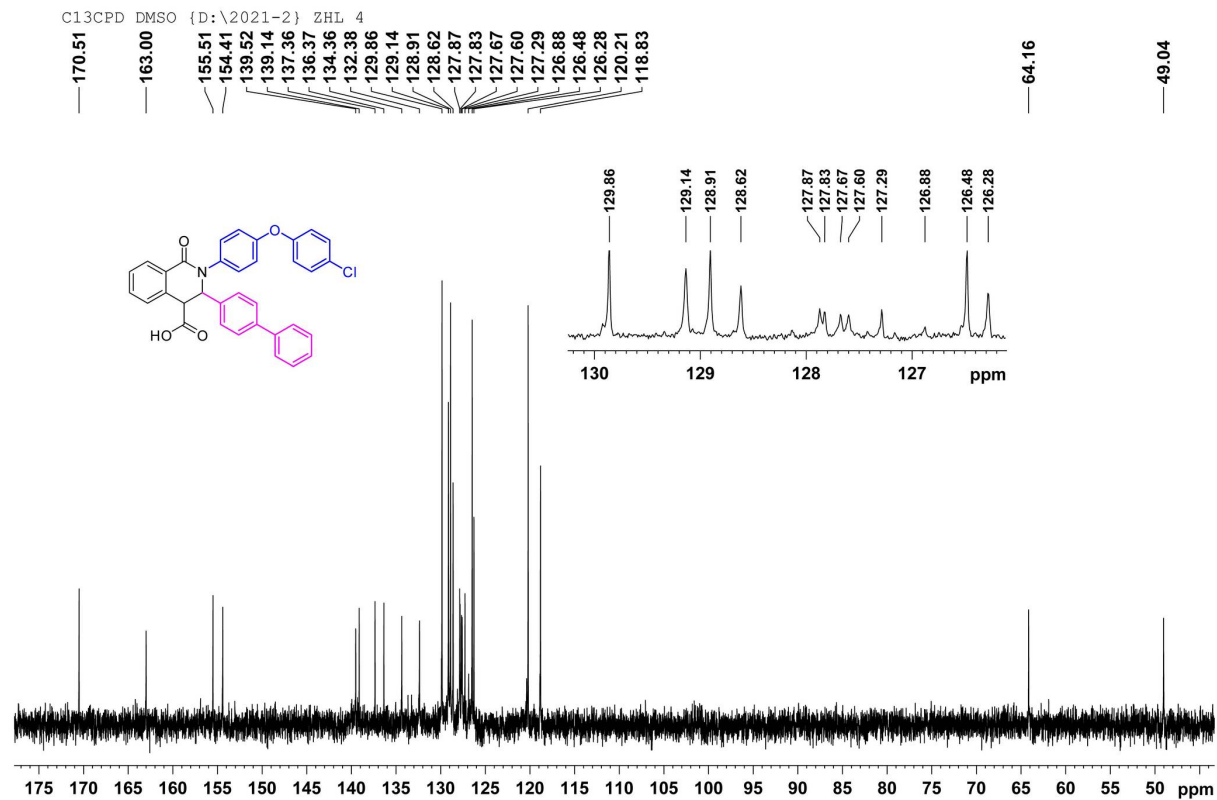

Figure S82. The  $^{13}\text{C}$  NMR spectrum of compound II4

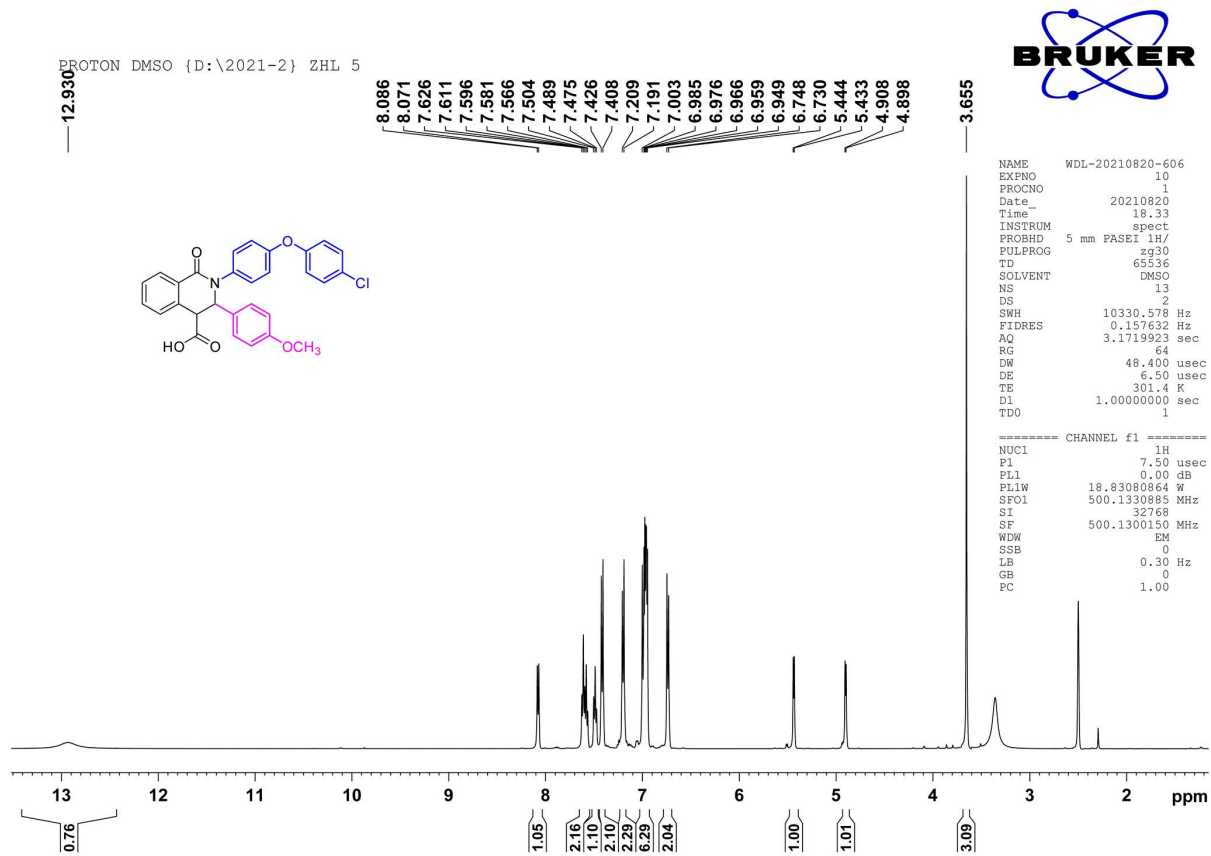

Figure S83. The  $^1\text{H}$  NMR spectrum of compound II5

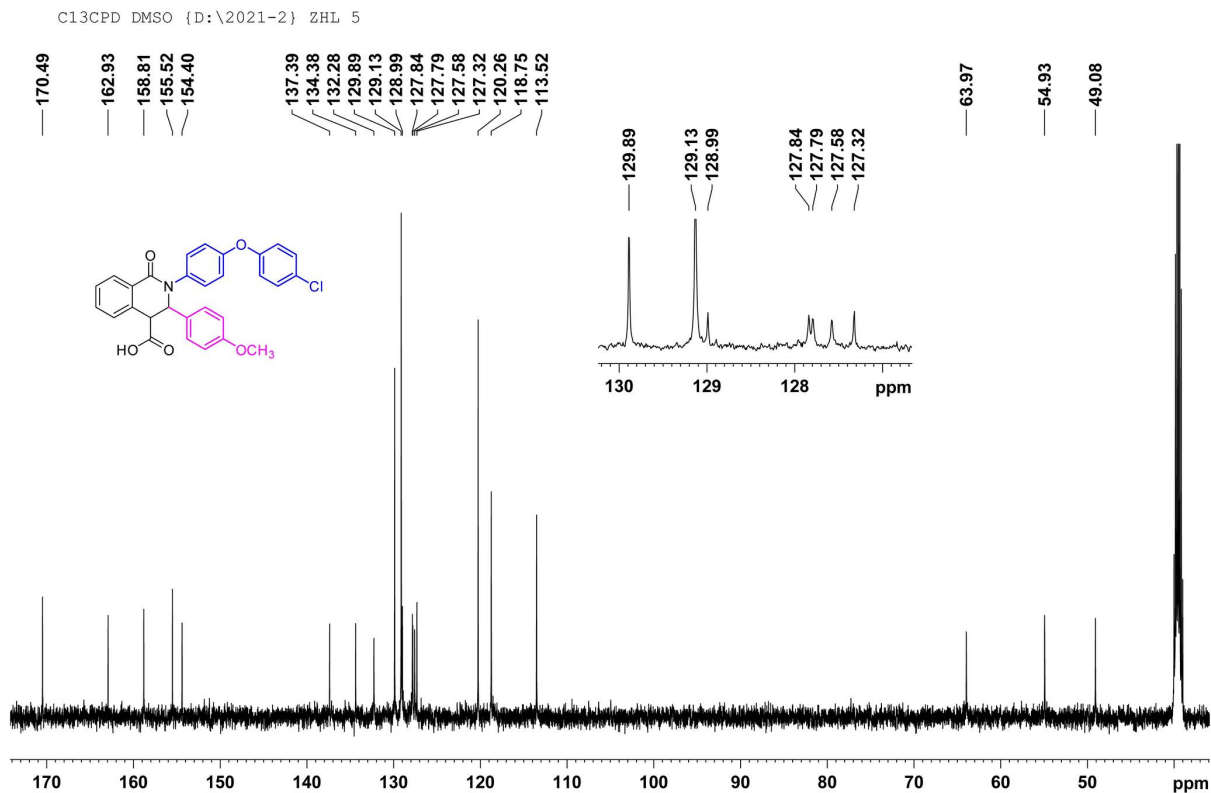

Figure S84. The  $^{13}\text{C}$  NMR spectrum of compound II5



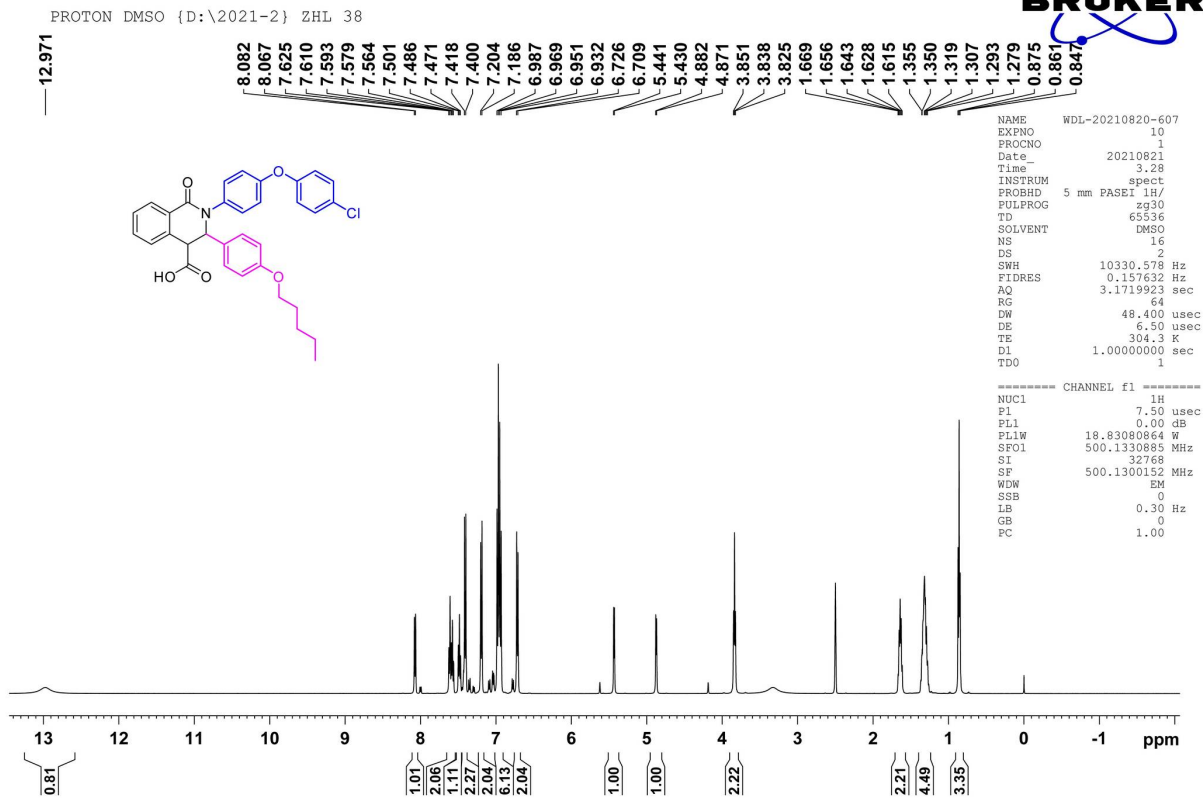

Figure S85. The  $^1\text{H}$  NMR spectrum of compound II6

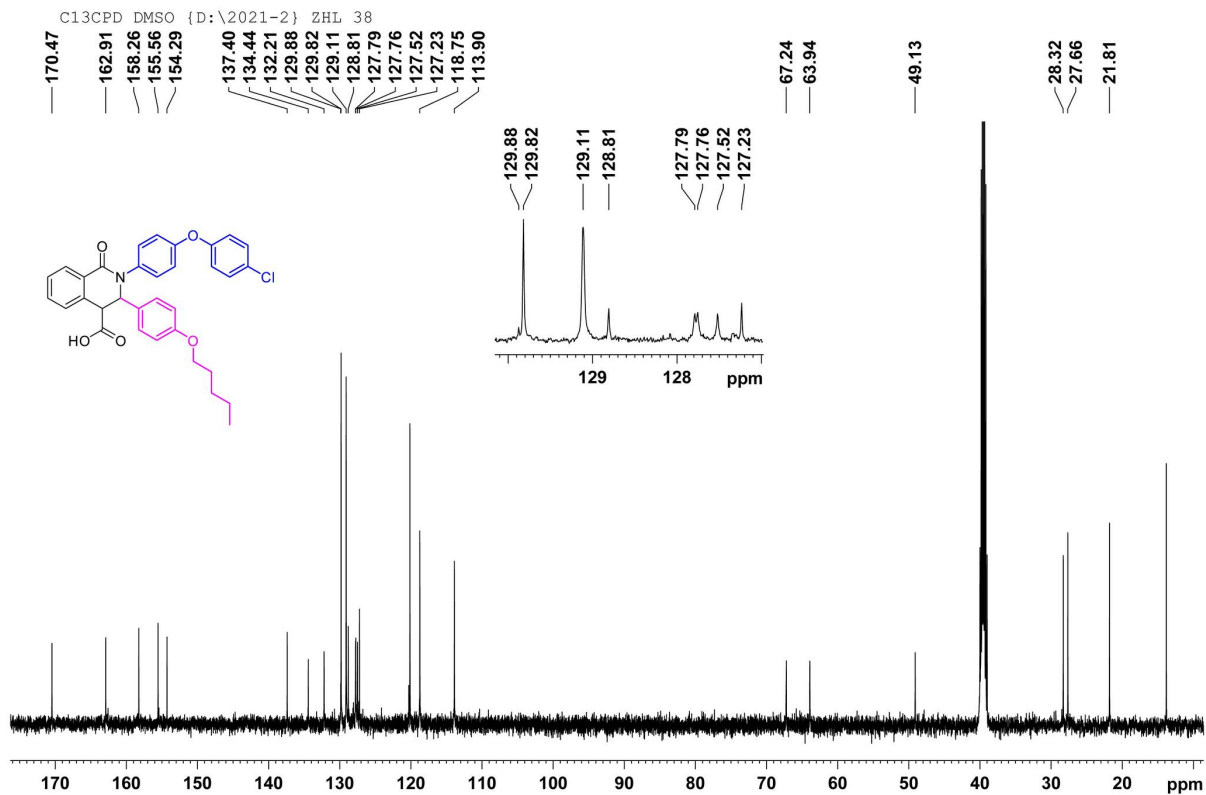

Figure S86. The  $^{13}\text{C}$  NMR spectrum of compound II6

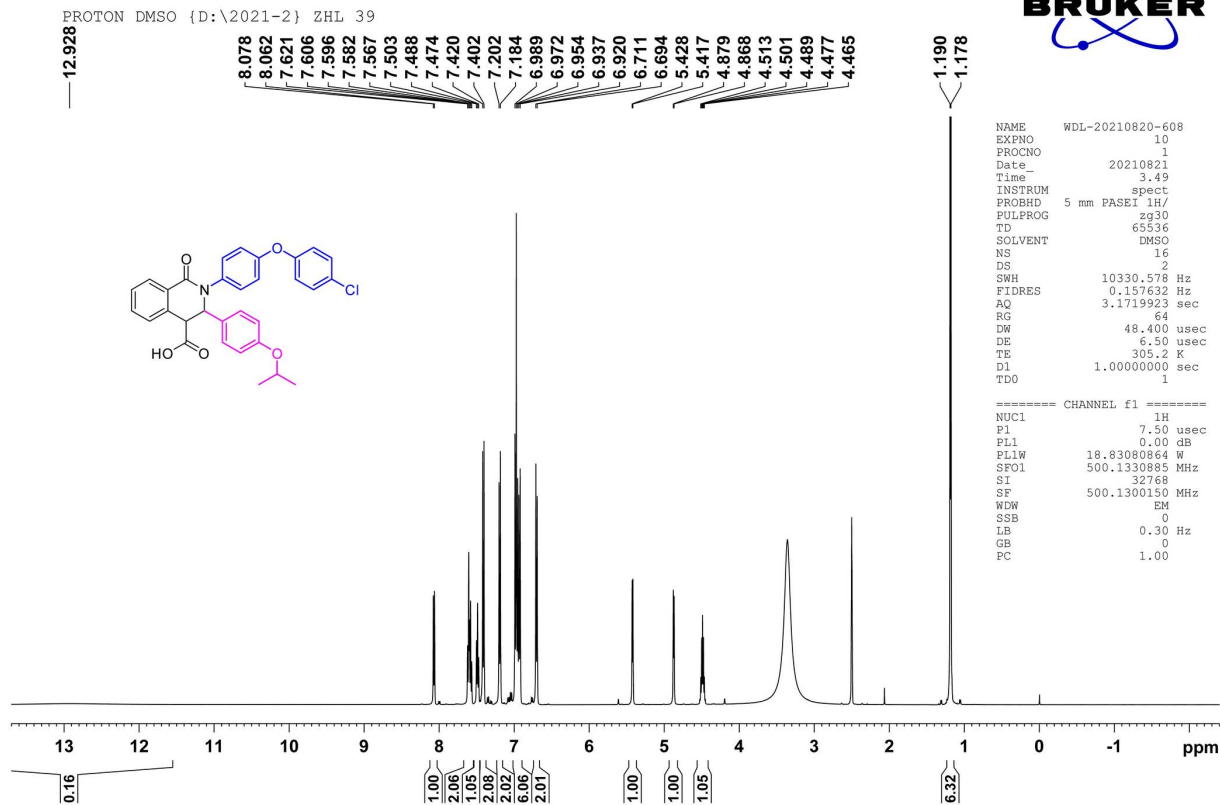

Figure S87. The  $^1\text{H}$  NMR spectrum of compound II7

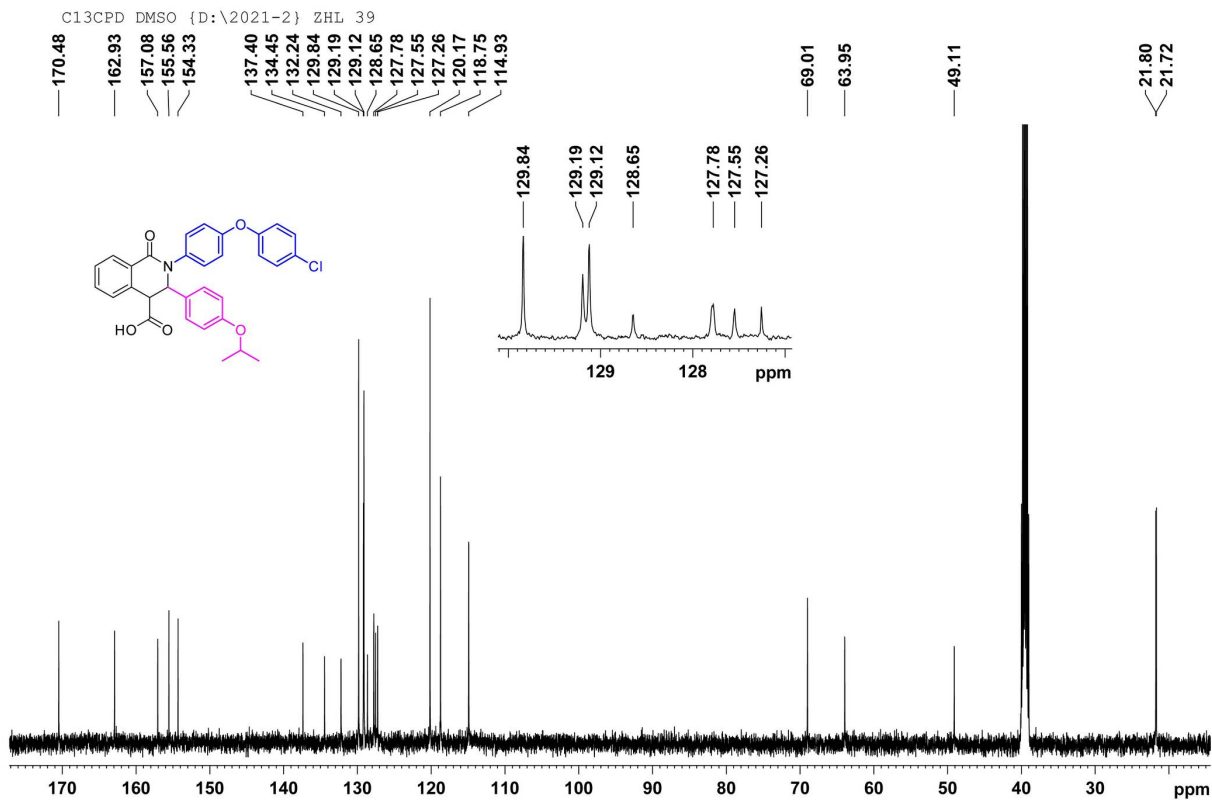

Figure S88. The  $^{13}\text{C}$  NMR spectrum of compound II7

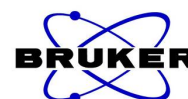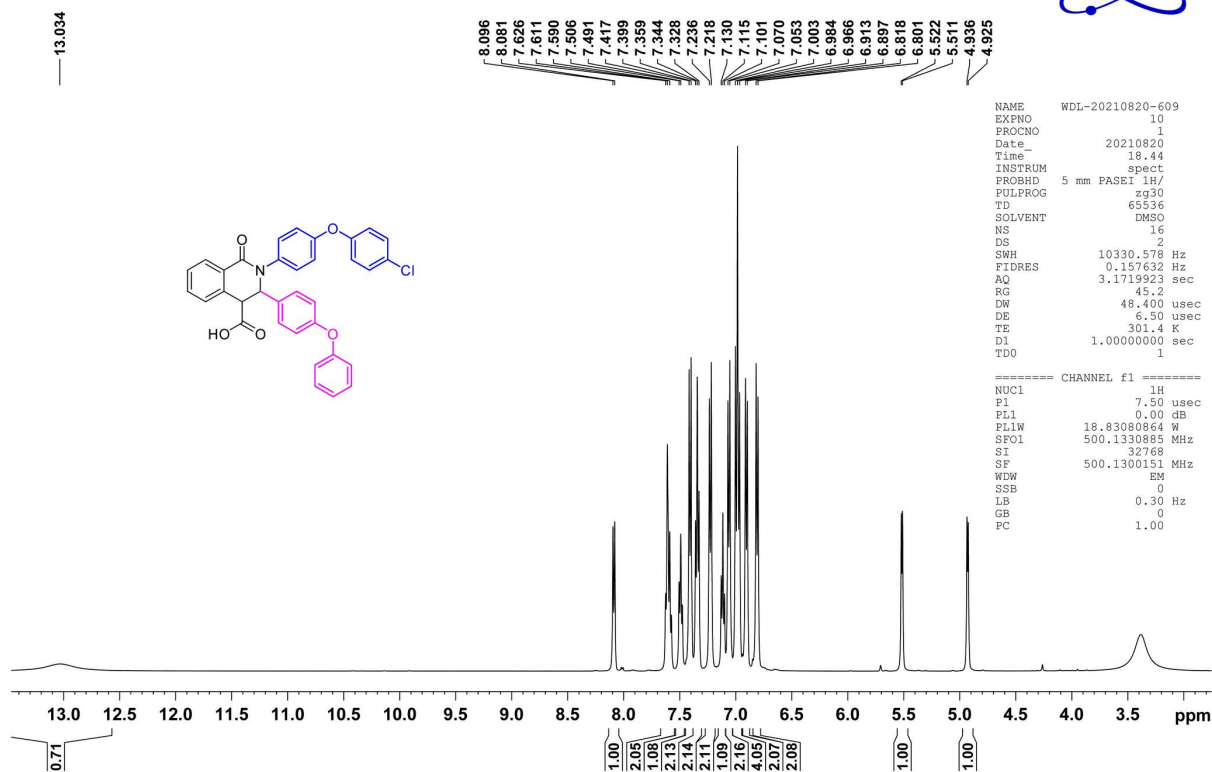

Figure S89. The <sup>1</sup>H NMR spectrum of compound II8

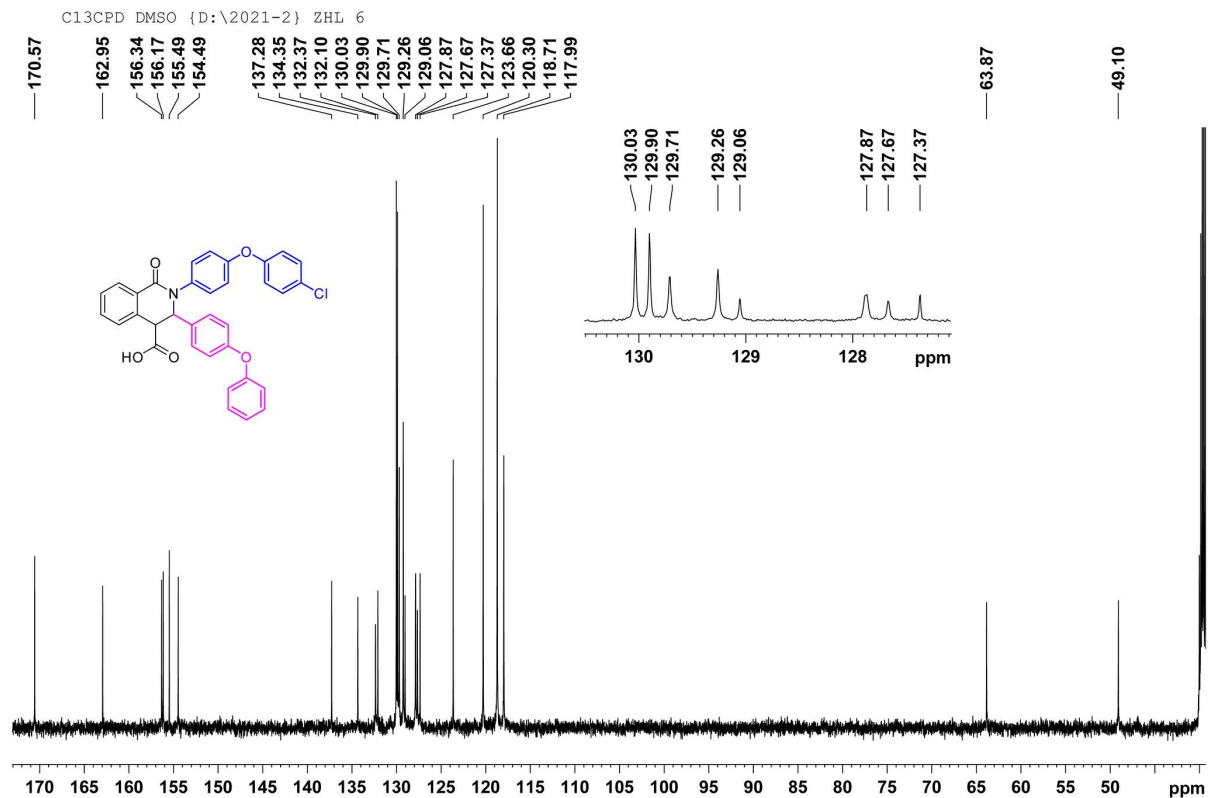

Figure S90. The <sup>13</sup>C NMR spectrum of compound II8

PROTON DMSO {D:\2021-2} ZHL 41

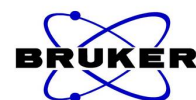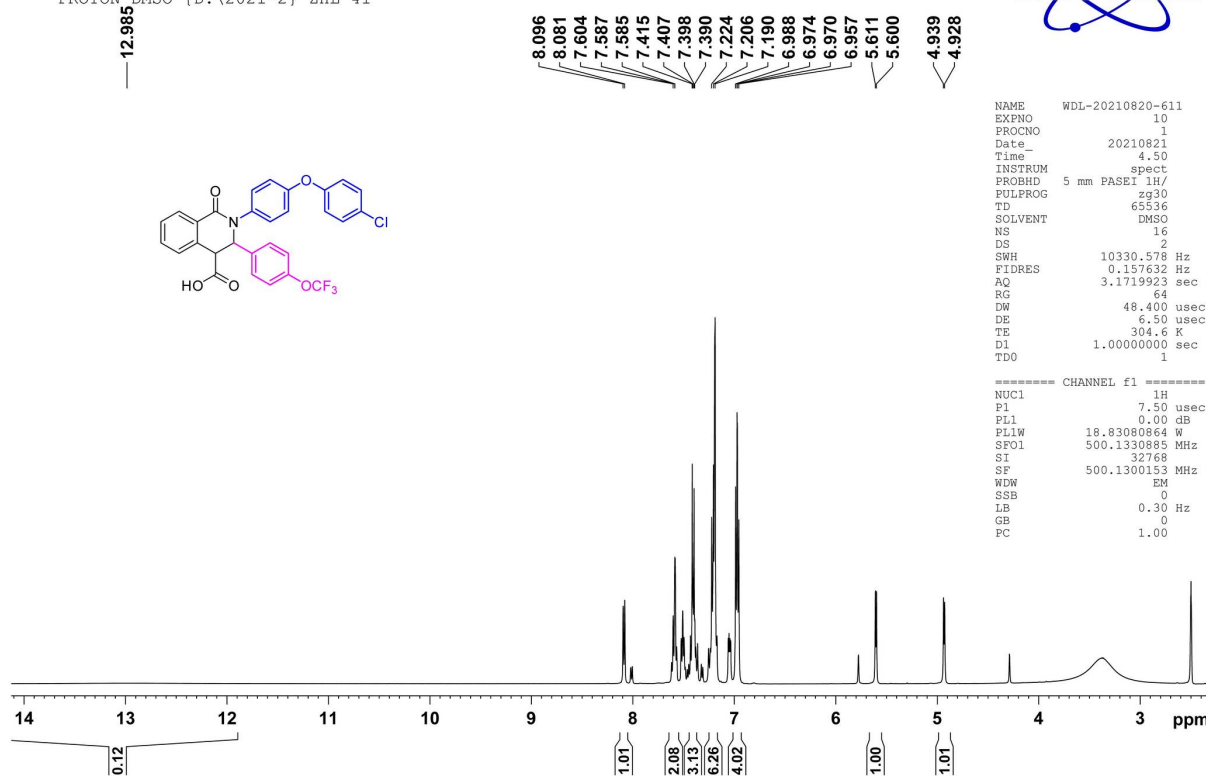

Figure S91. The <sup>1</sup>H NMR spectrum of compound II9

C13CPD DMSO {D:\2021-2} ZHL 41

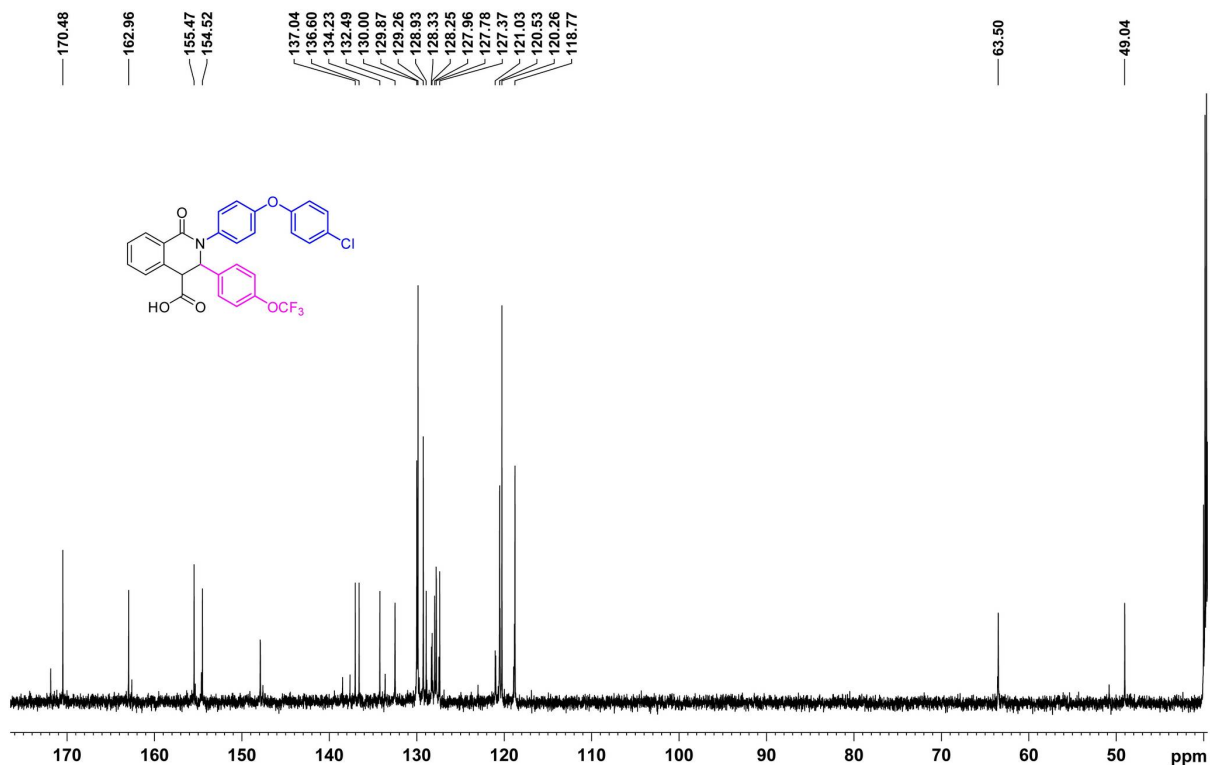

Figure S92. The <sup>13</sup>C NMR spectrum of compound II9

PROTON DMSO {D:\2021-2} ZHL 7

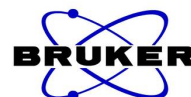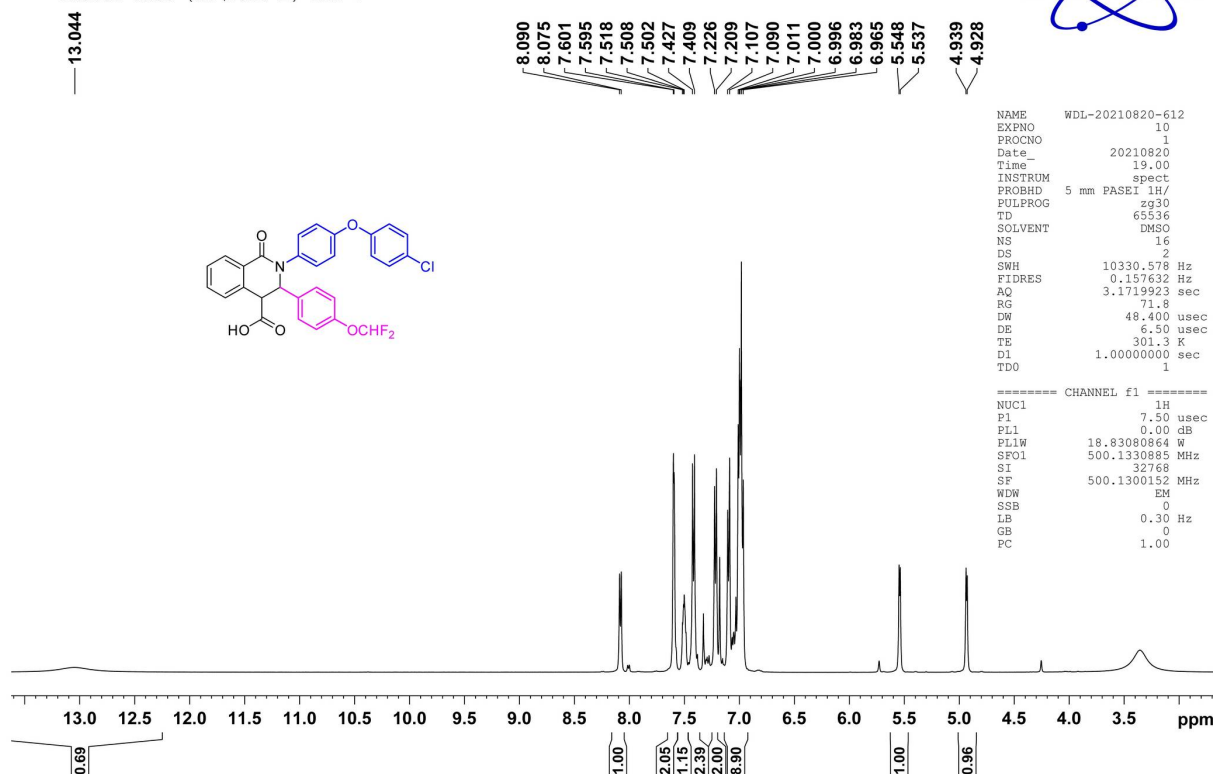

Figure S93. The  $^1\text{H}$  NMR spectrum of compound III10

C13CPD DMSO {D:\2021-2} ZHL 7

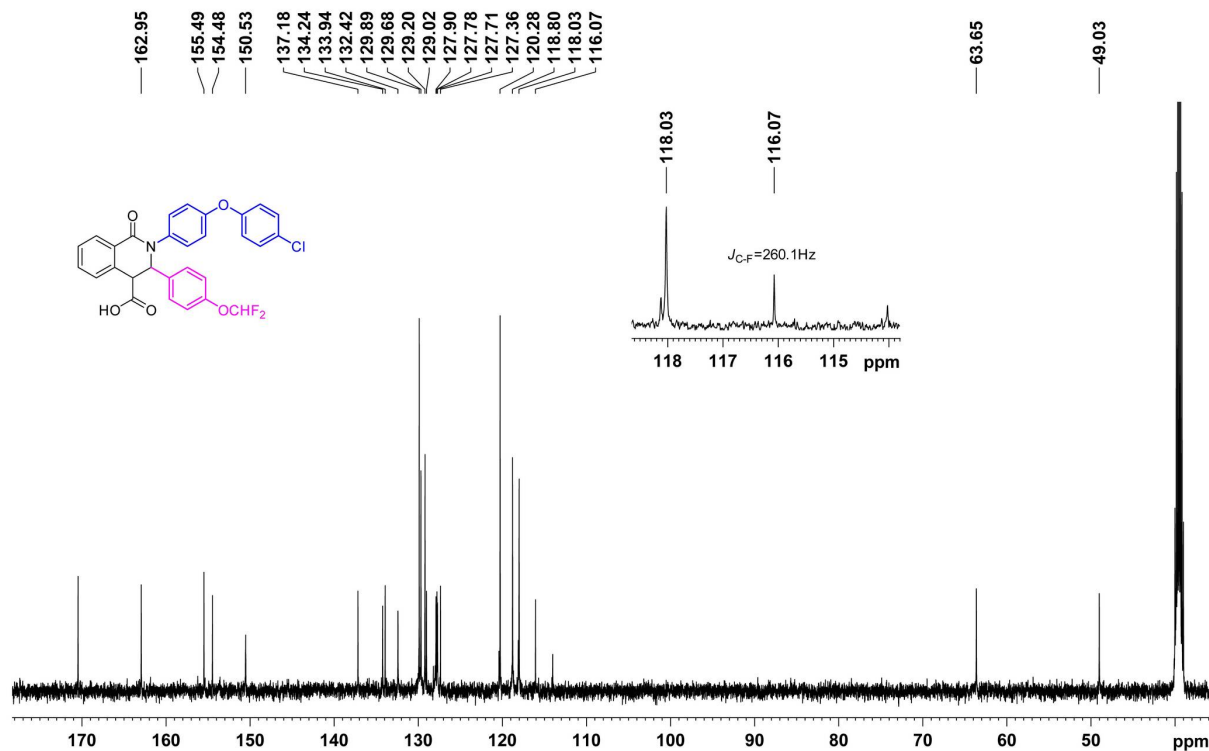

Figure S94. The  $^{13}\text{C}$  NMR spectrum of compound III10

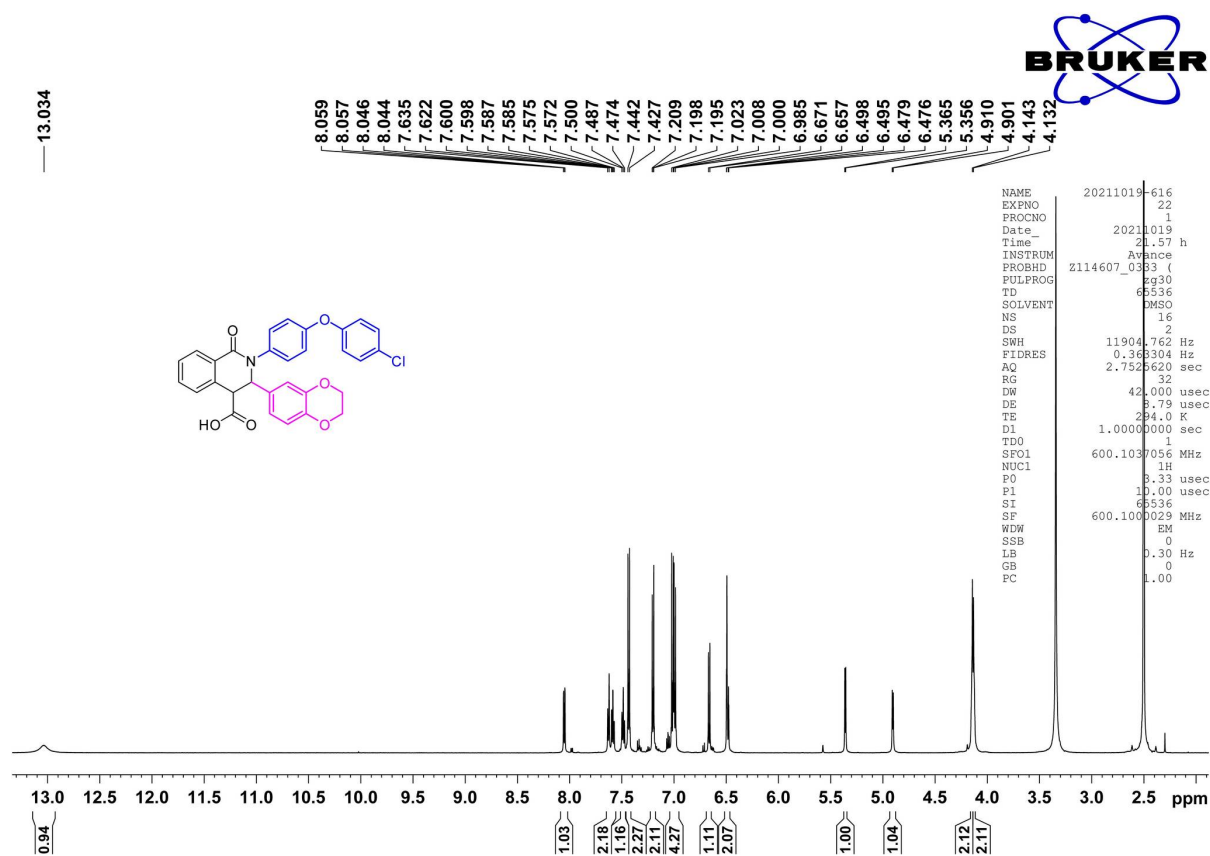

Figure S95. The  $^1\text{H}$  NMR spectrum of compound III1

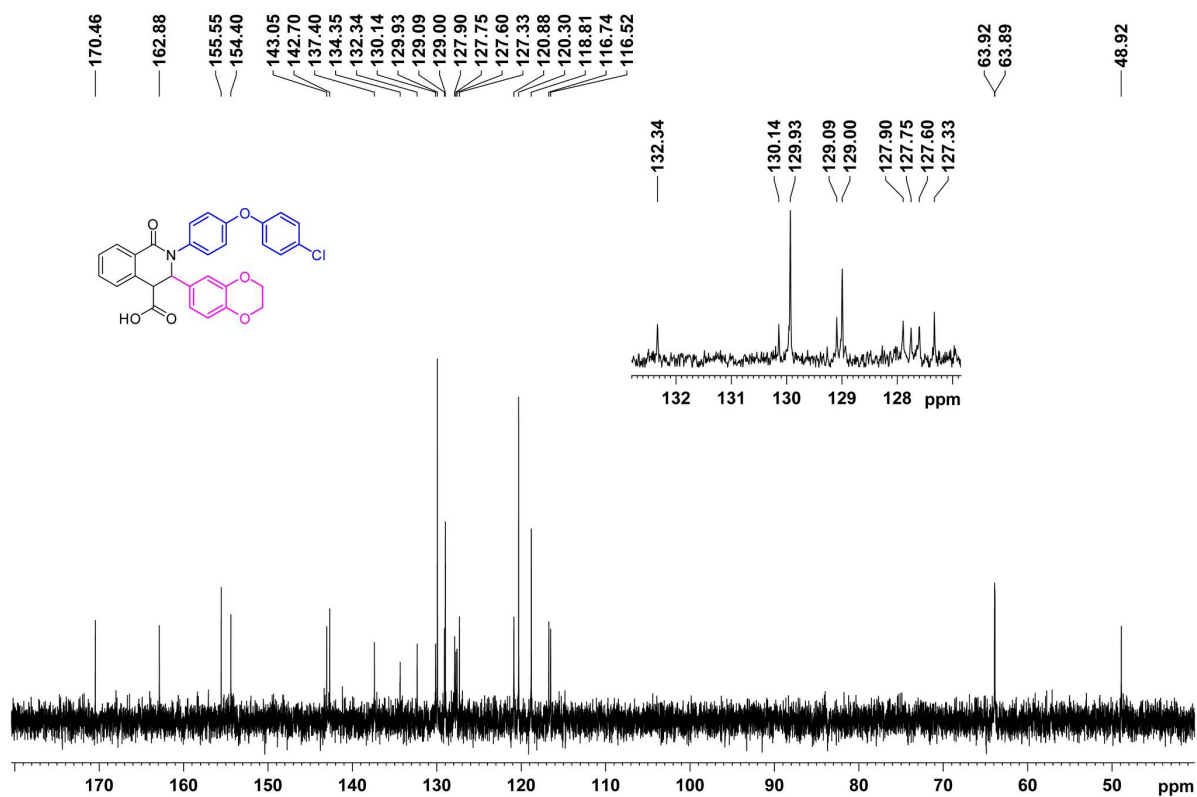

Figure S96. The  $^{13}\text{C}$  NMR spectrum of compound III1

PROTON DMSO {D:\2021-2} ZHL 8

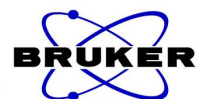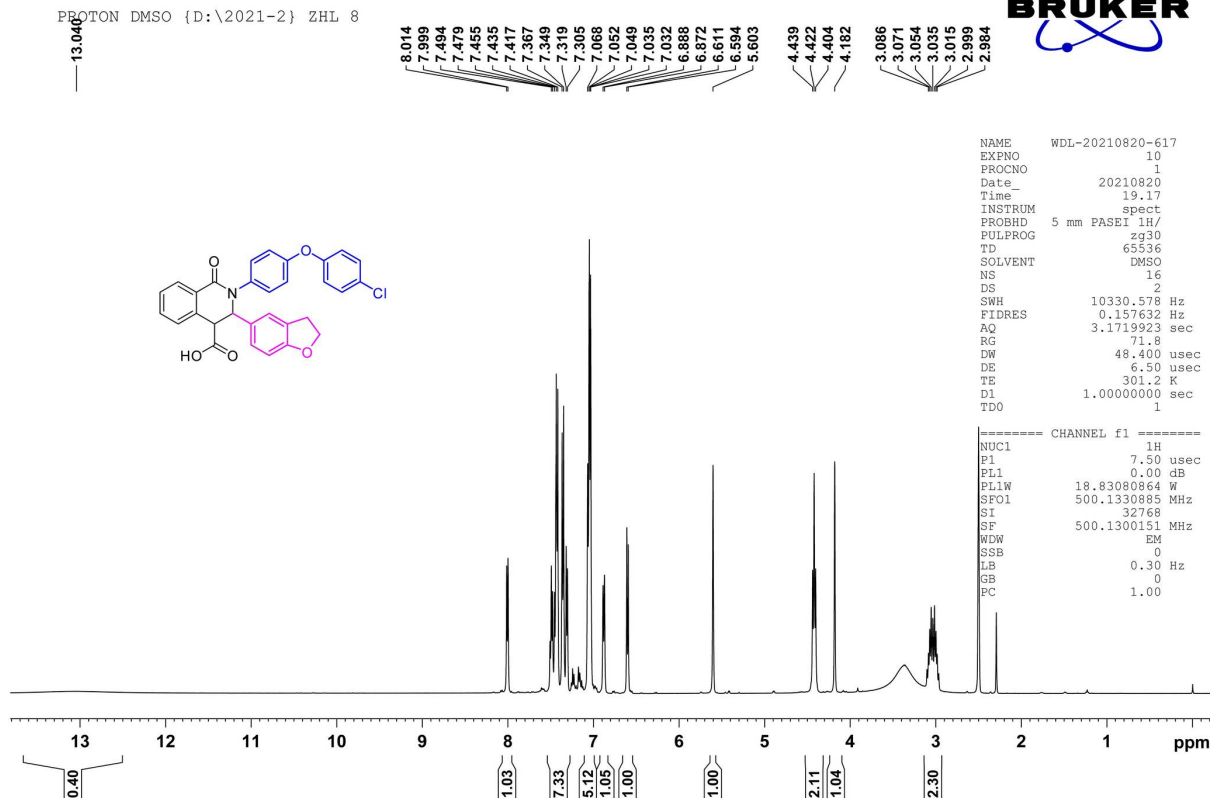

Figure S97. The  $^1\text{H}$  NMR spectrum of compound III2

C13CPD DMSO {D:\2021-2} ZHL 8

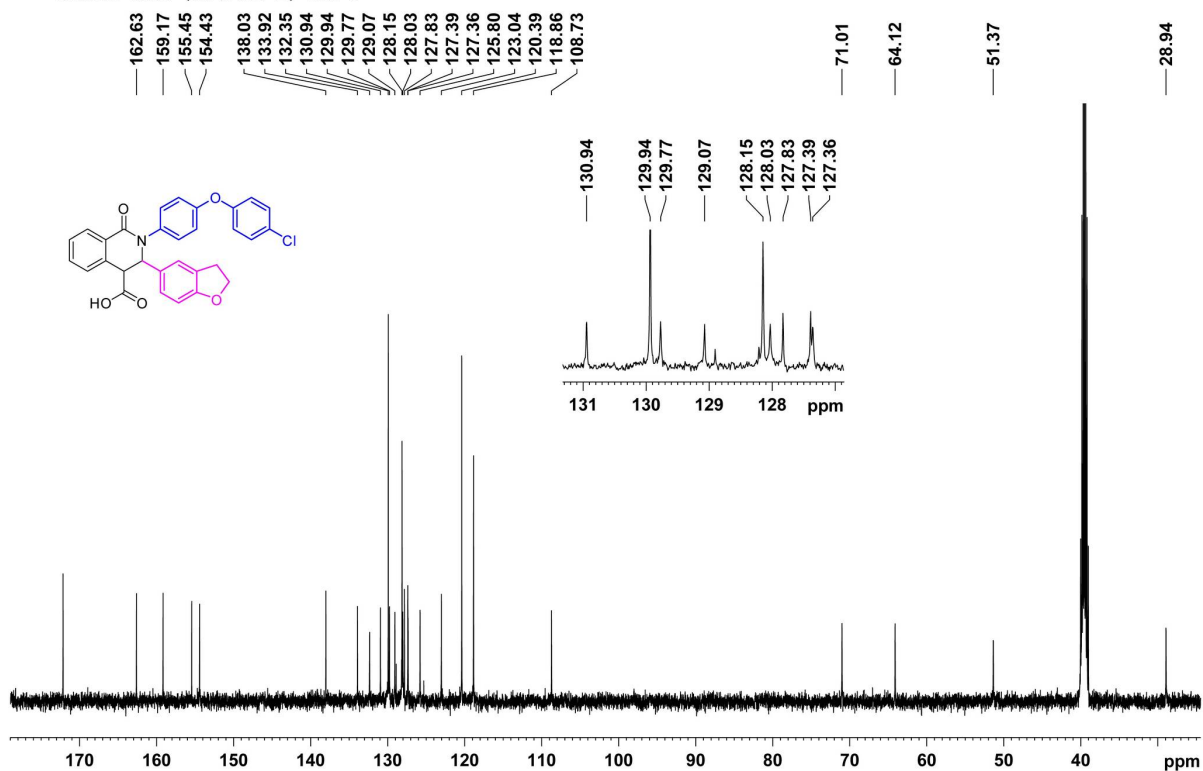

Figure S98. The  $^{13}\text{C}$  NMR spectrum of compound III2

PROTON DMSO {D:\2021-2} ZHL 9

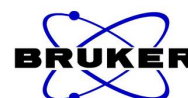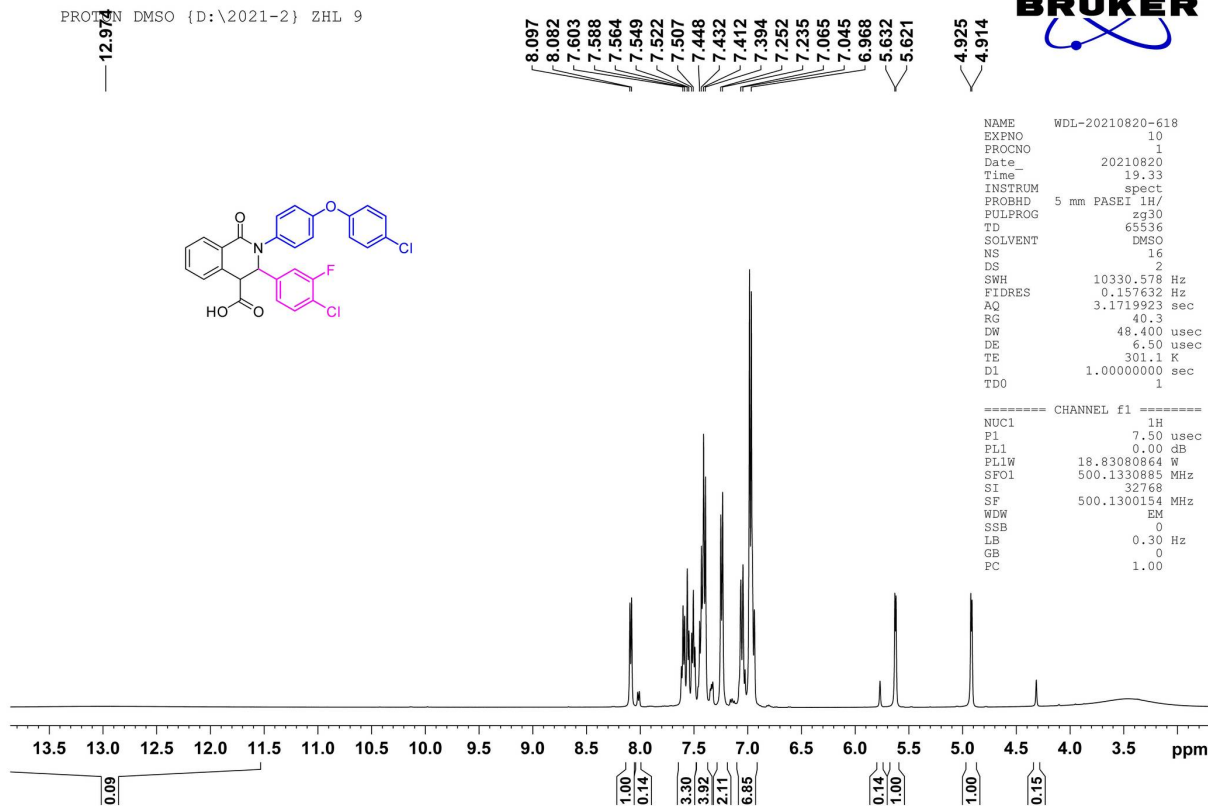

Figure S99. The <sup>1</sup>H NMR spectrum of compound III3

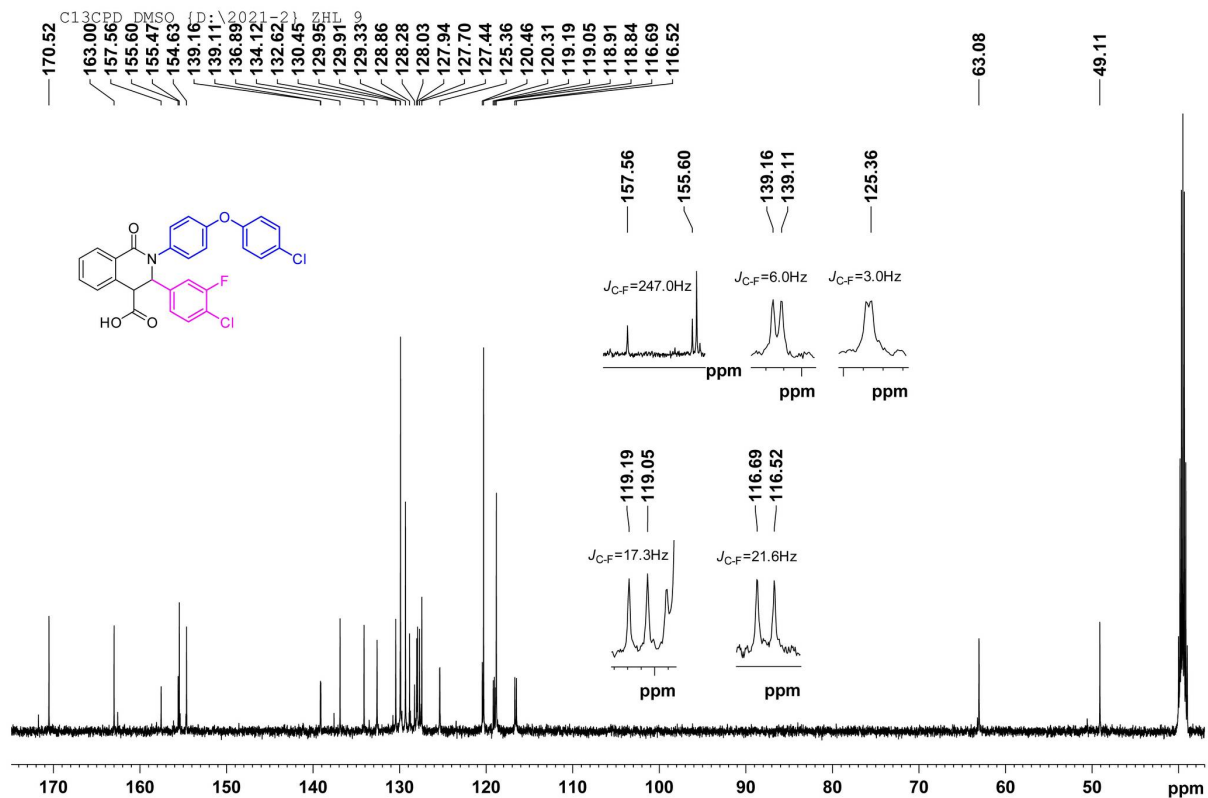

Figure S100. The <sup>13</sup>C NMR spectrum of compound III3



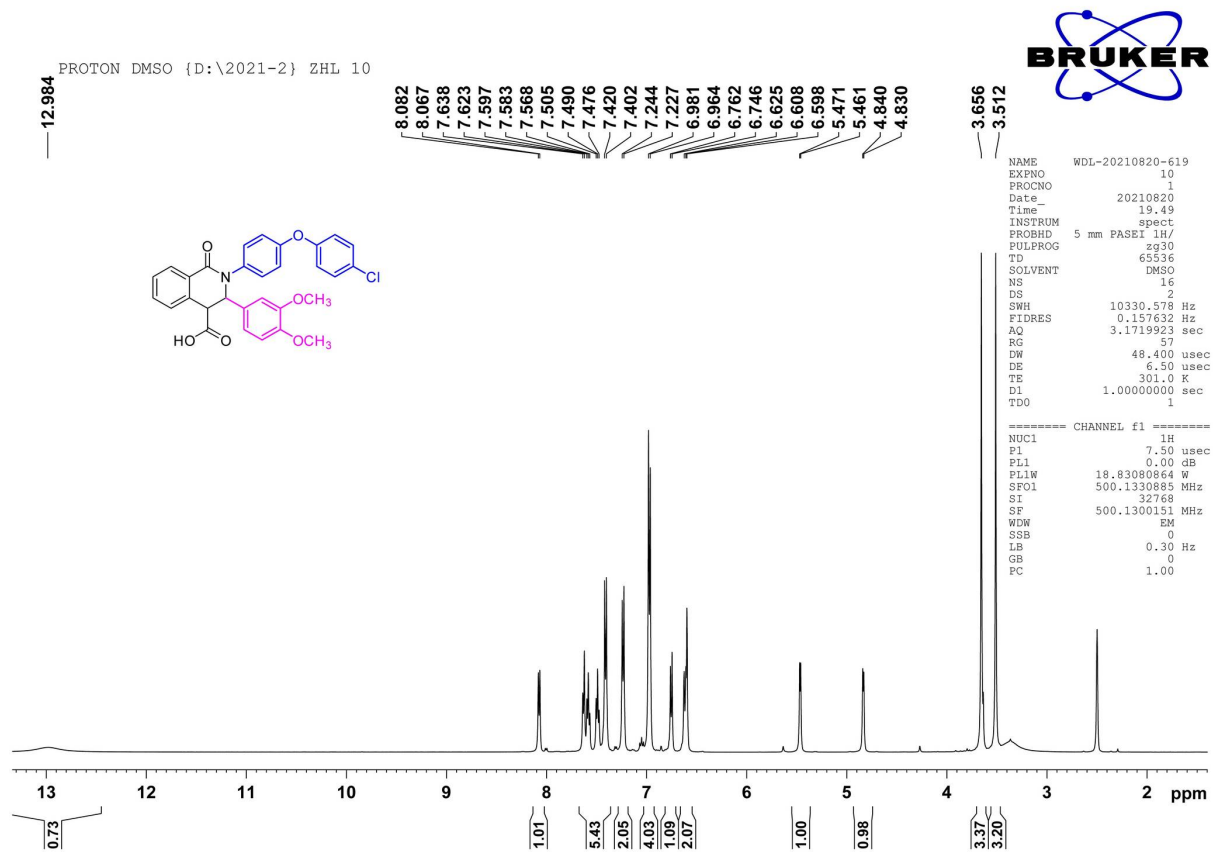

Figure S101. The  $^1\text{H}$  NMR spectrum of compound II14

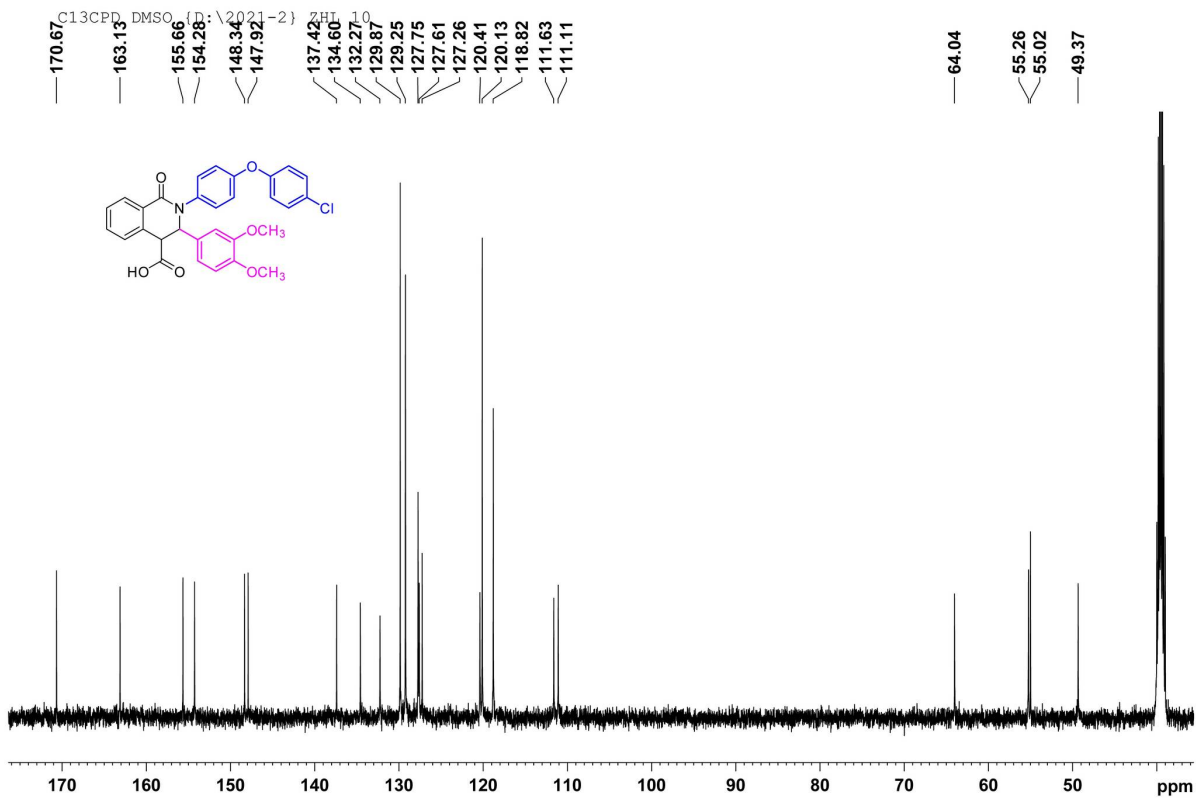

Figure S102. The  $^{13}\text{C}$  NMR spectrum of compound II14

PROTON DMSO {D:\2021-2} ZHL 11

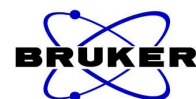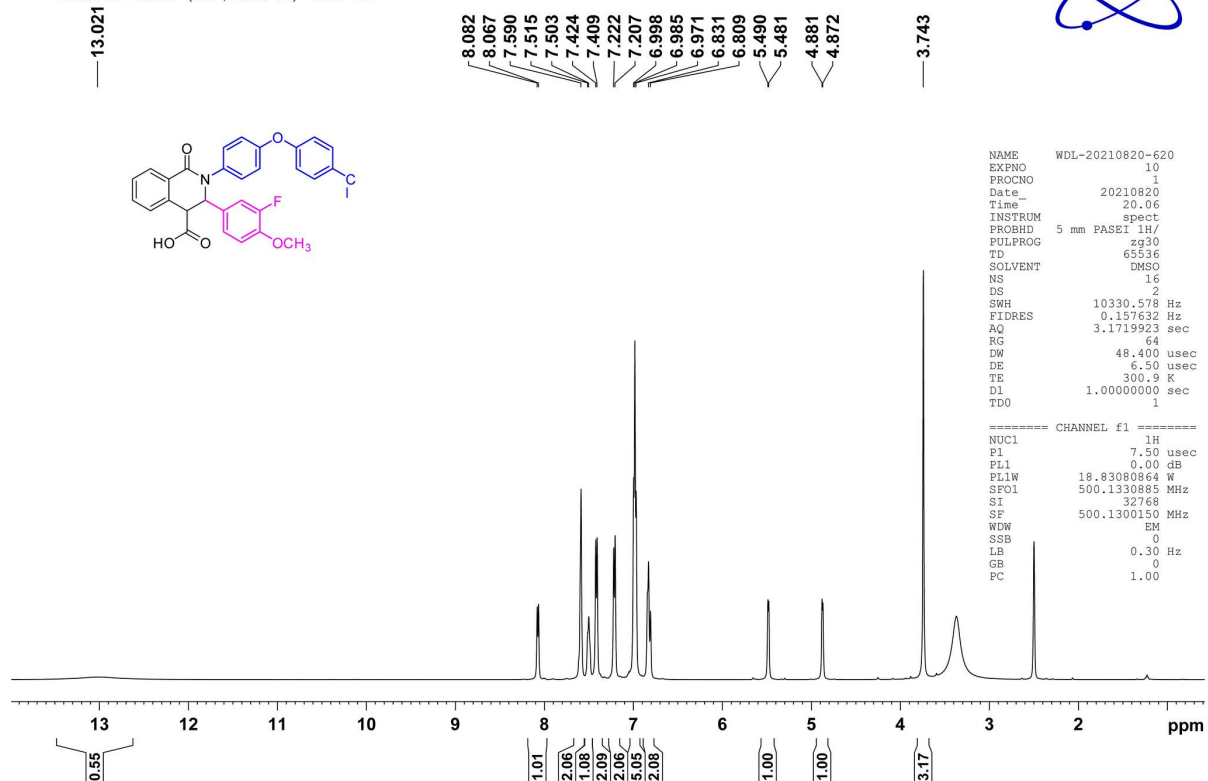

Figure S103. The <sup>1</sup>H NMR spectrum of compound II15

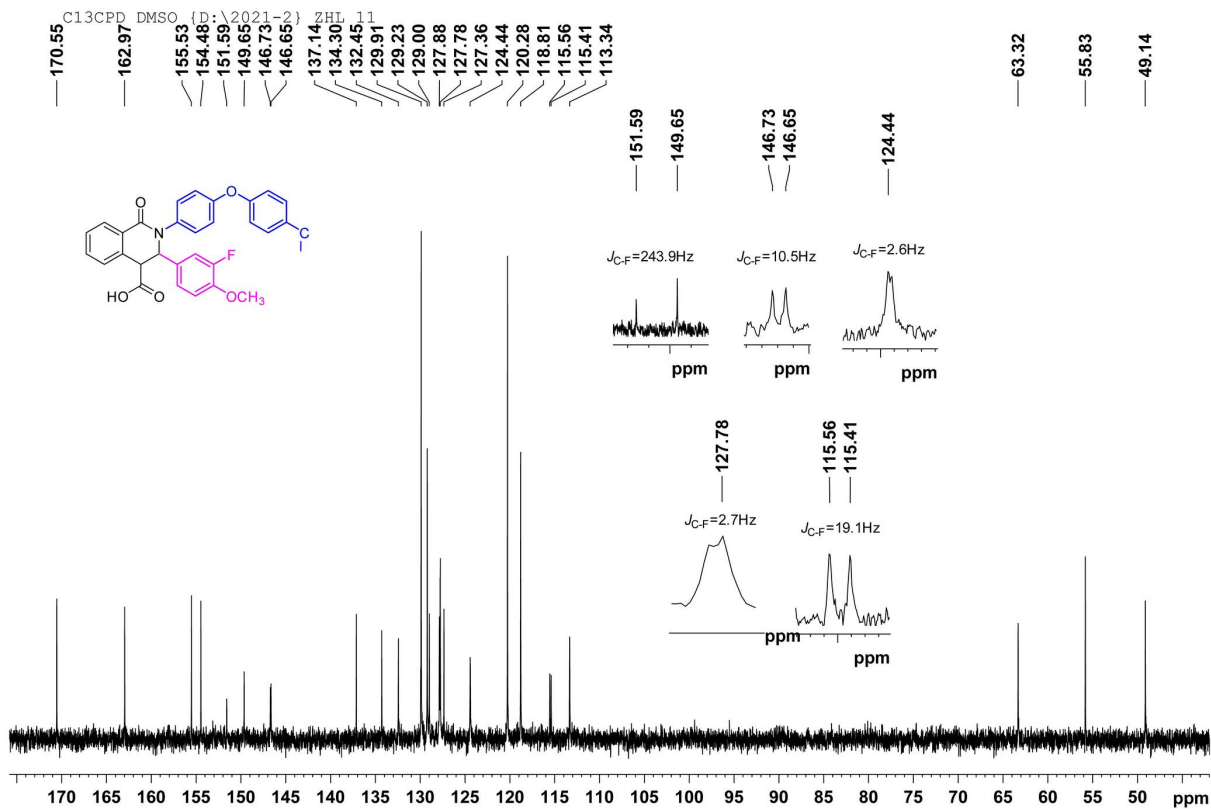

Figure S104. The <sup>13</sup>C NMR spectrum of compound II15

PROTON DMSO {D:\2021-2} ZHL 12

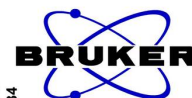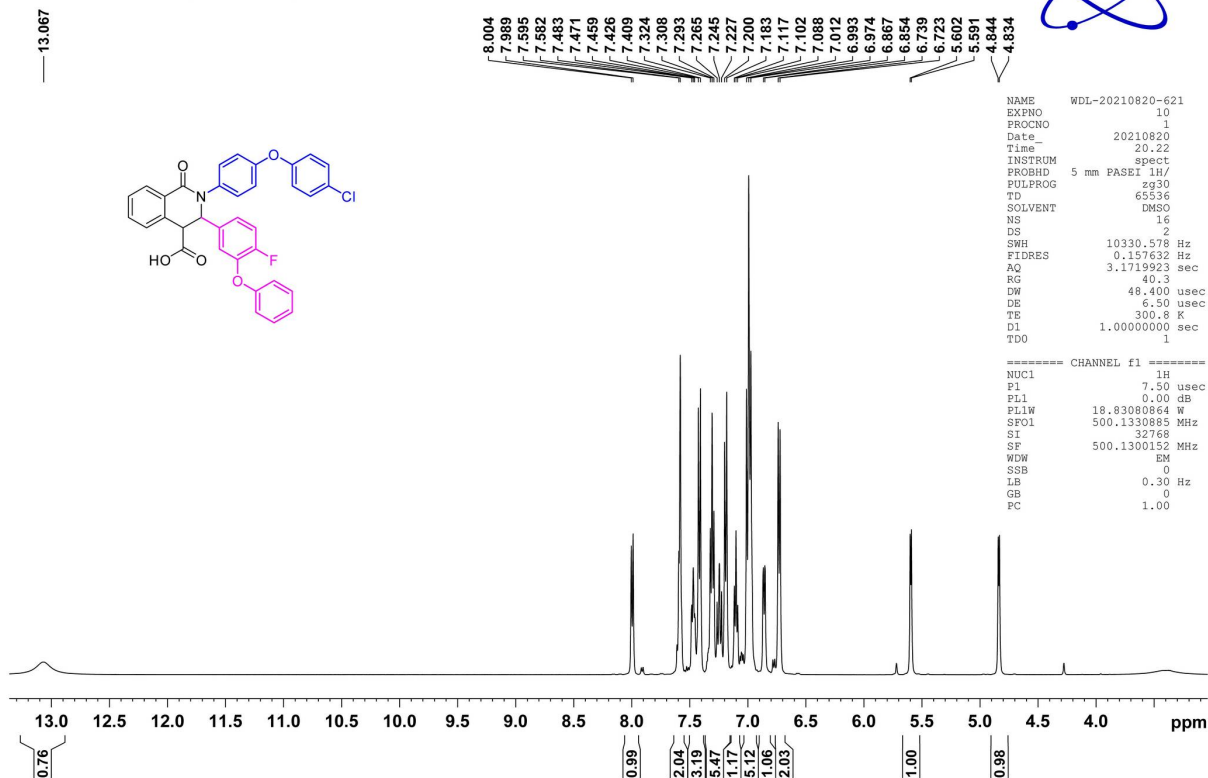

Figure S105. The  $^1\text{H}$  NMR spectrum of compound II16

C13CPD DMSO {D:\2021-2} ZHL 12

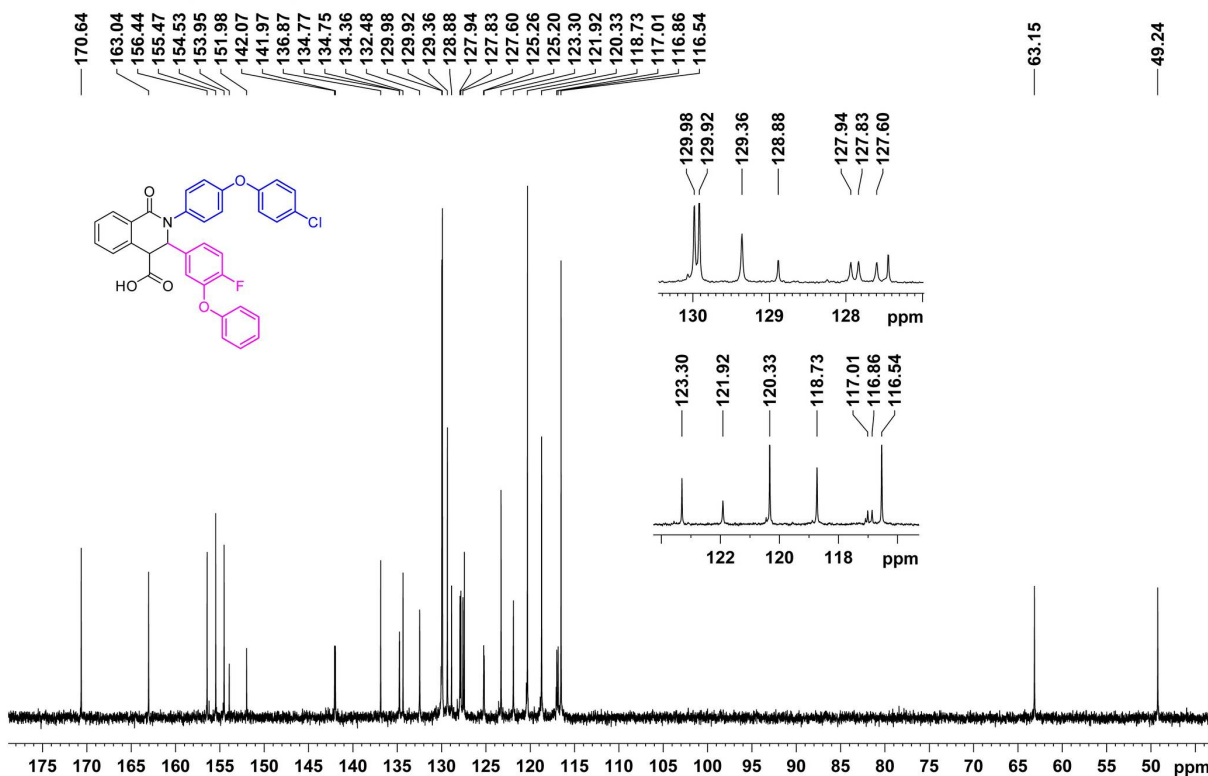

Figure S106. The  $^{13}\text{C}$  NMR spectrum of compound II16

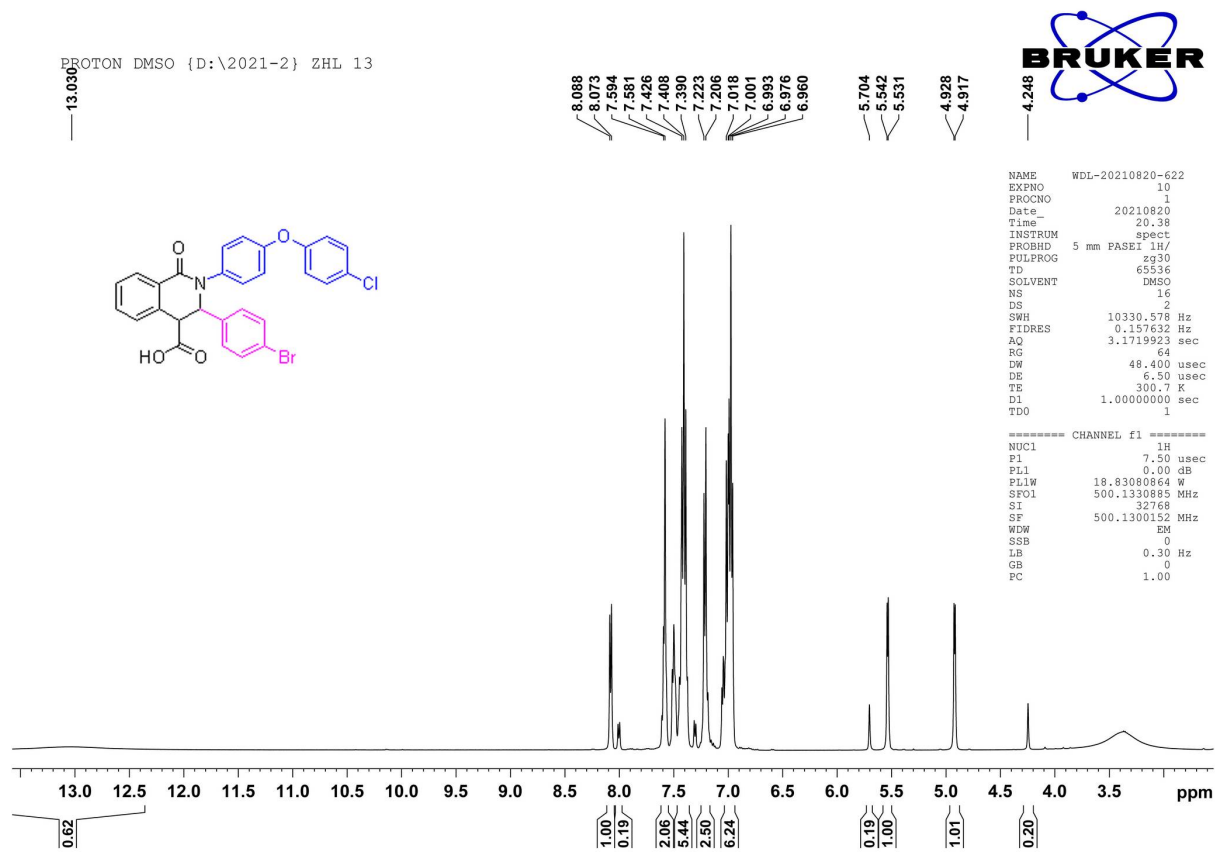

Figure S107. The  $^1\text{H}$  NMR spectrum of compound II17

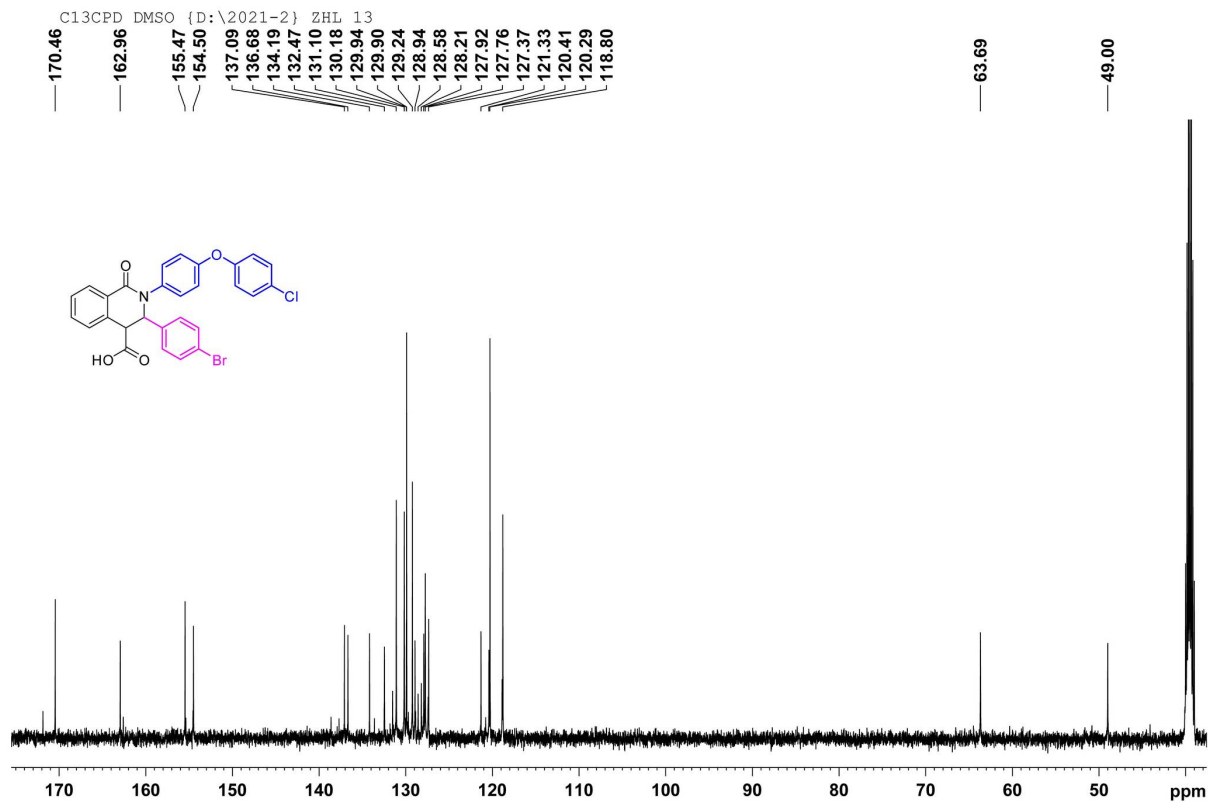

Figure S108. The  $^{13}\text{C}$  NMR spectrum of compound II17

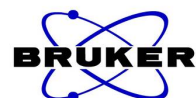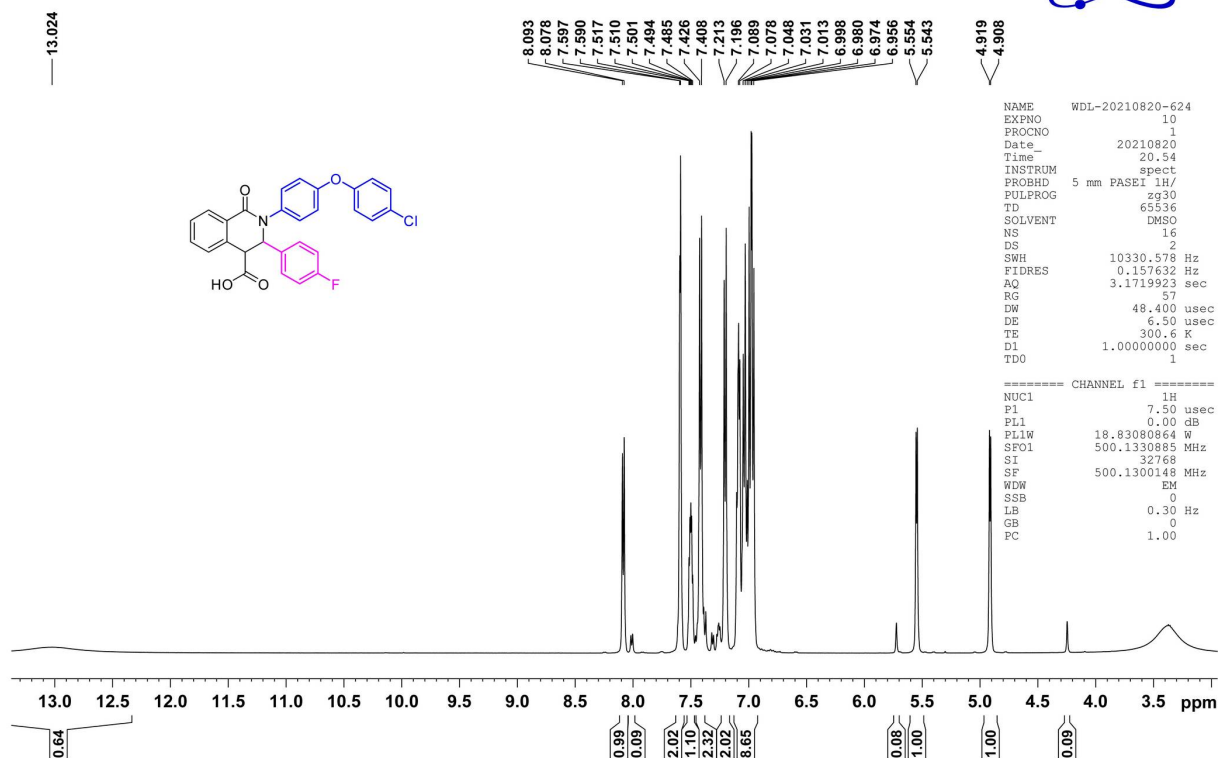

Figure S109. The <sup>1</sup>H NMR spectrum of compound II18

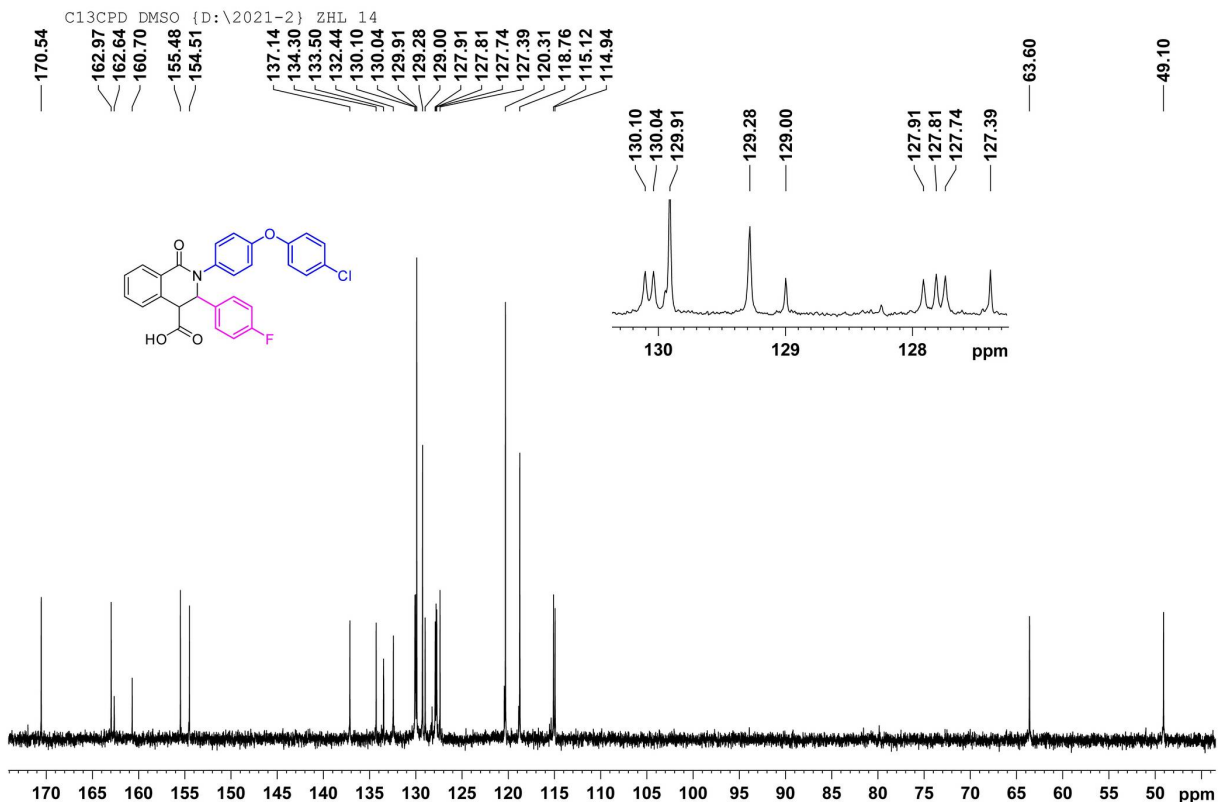

Figure S110. The <sup>13</sup>C NMR spectrum of compound II18

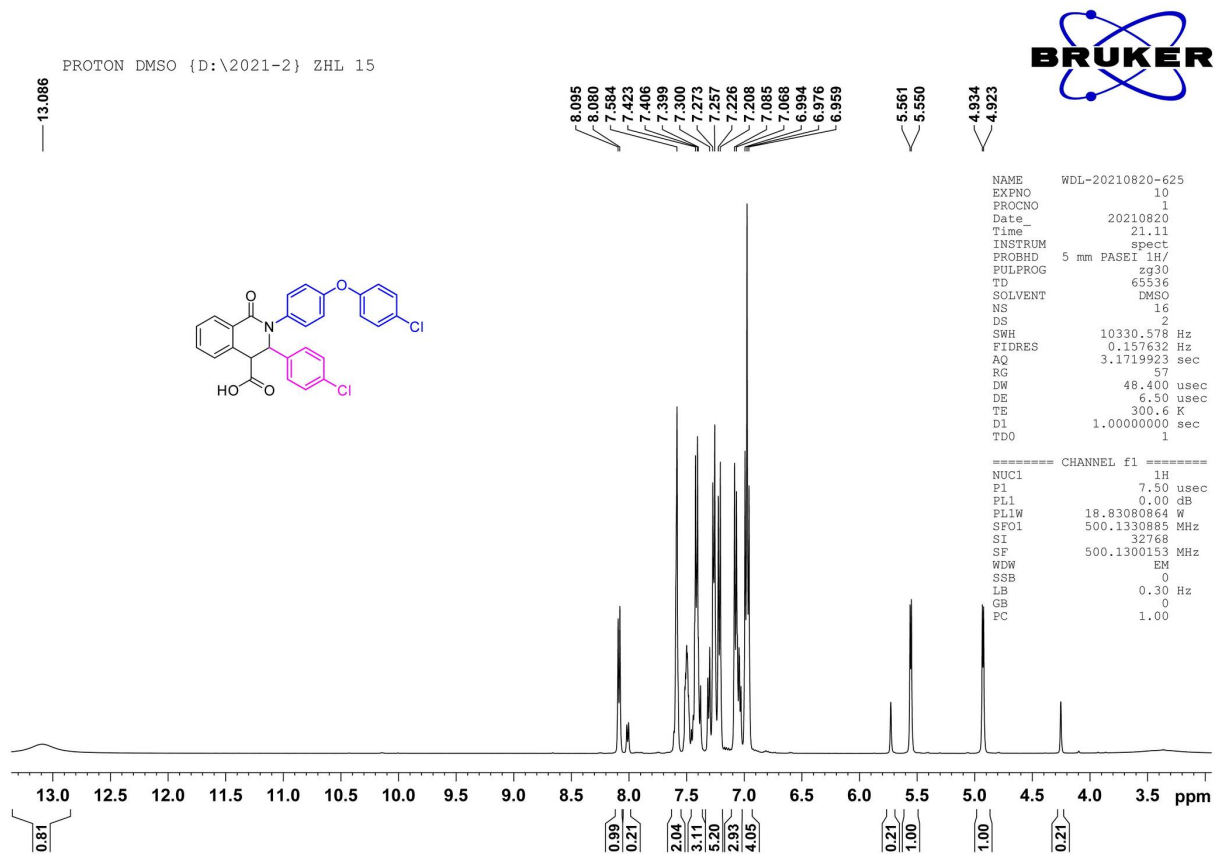

Figure S111. The  $^1\text{H}$  NMR spectrum of compound II19

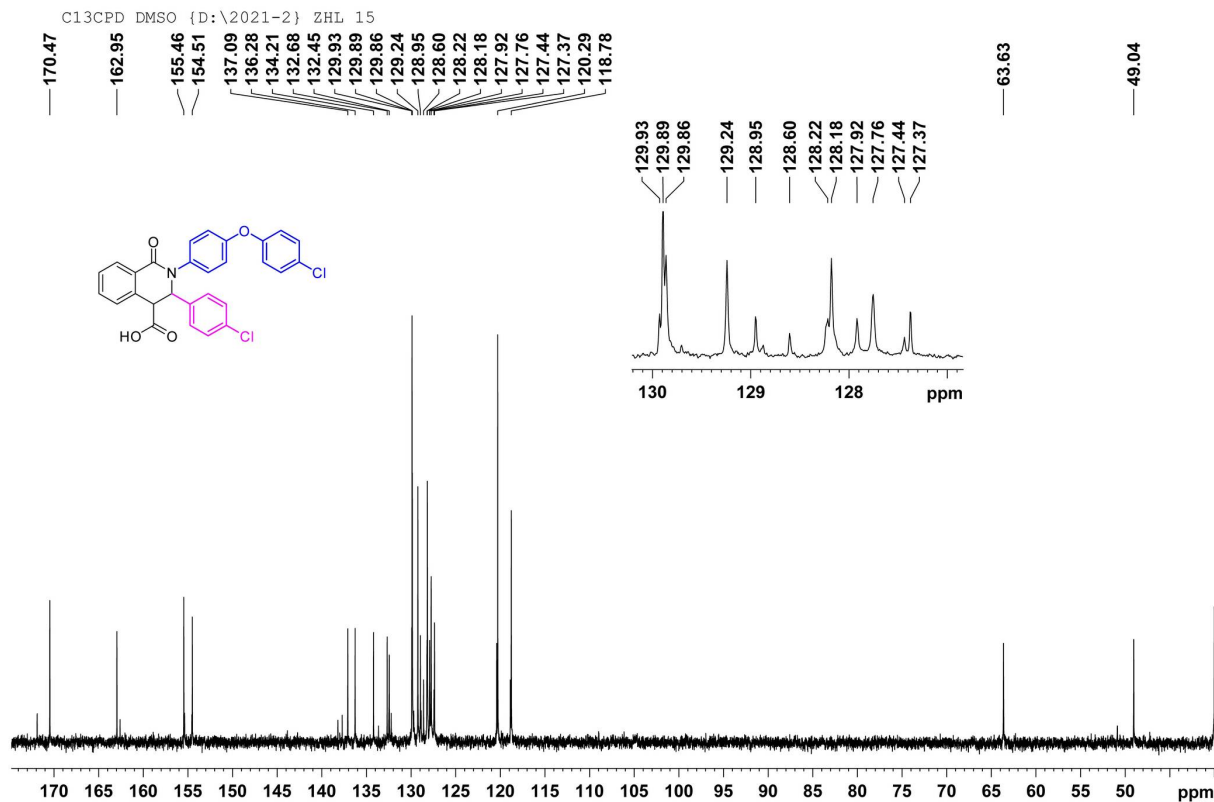

Figure S112. The  $^{13}\text{C}$  NMR spectrum of compound II19

PROTON DMSO {D:\2021-2} ZHL 16

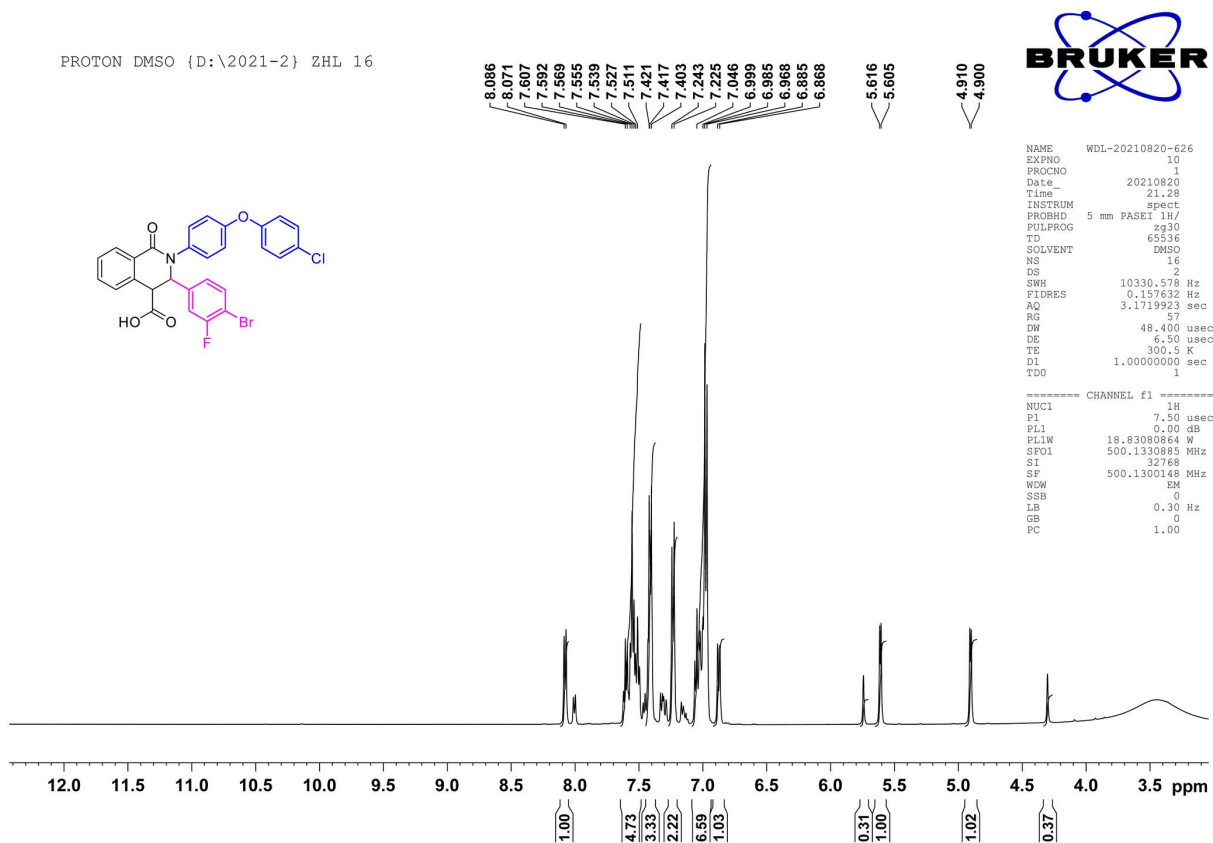

Figure S113. The <sup>1</sup>H NMR spectrum of compound II20

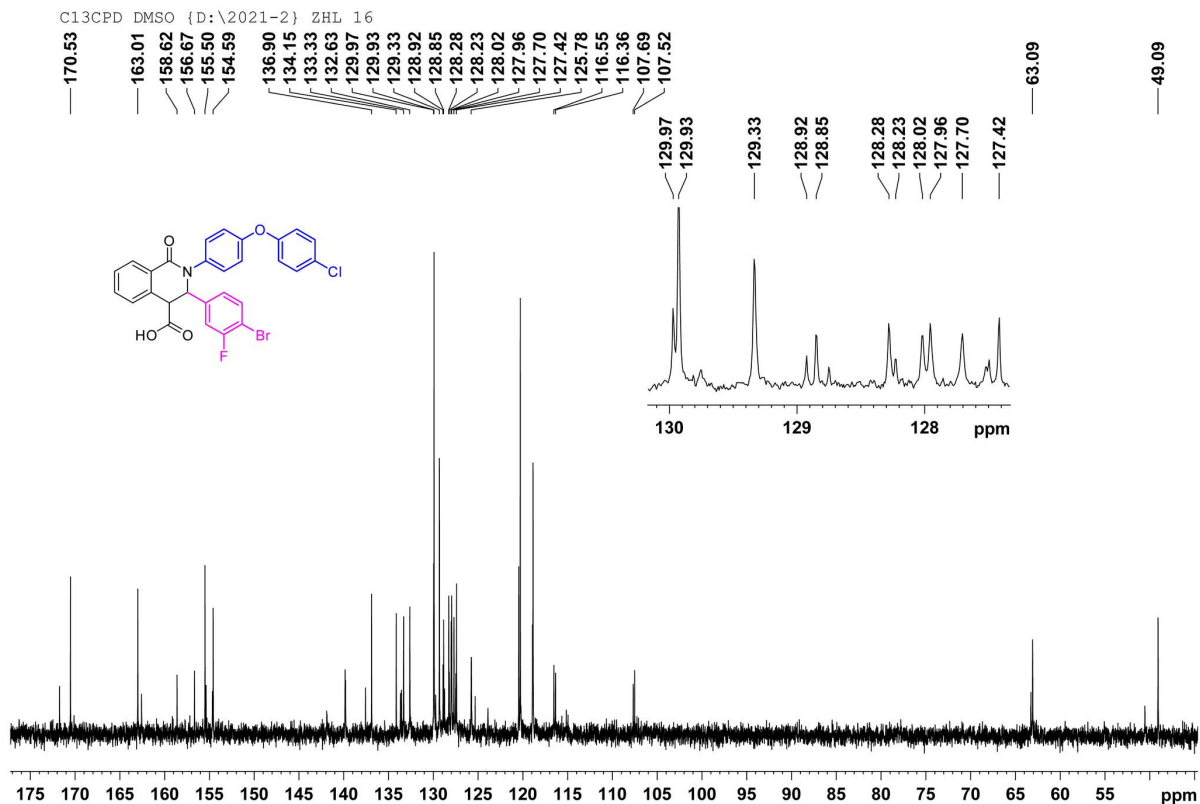

Figure S114. The <sup>13</sup>C NMR spectrum of compound II20

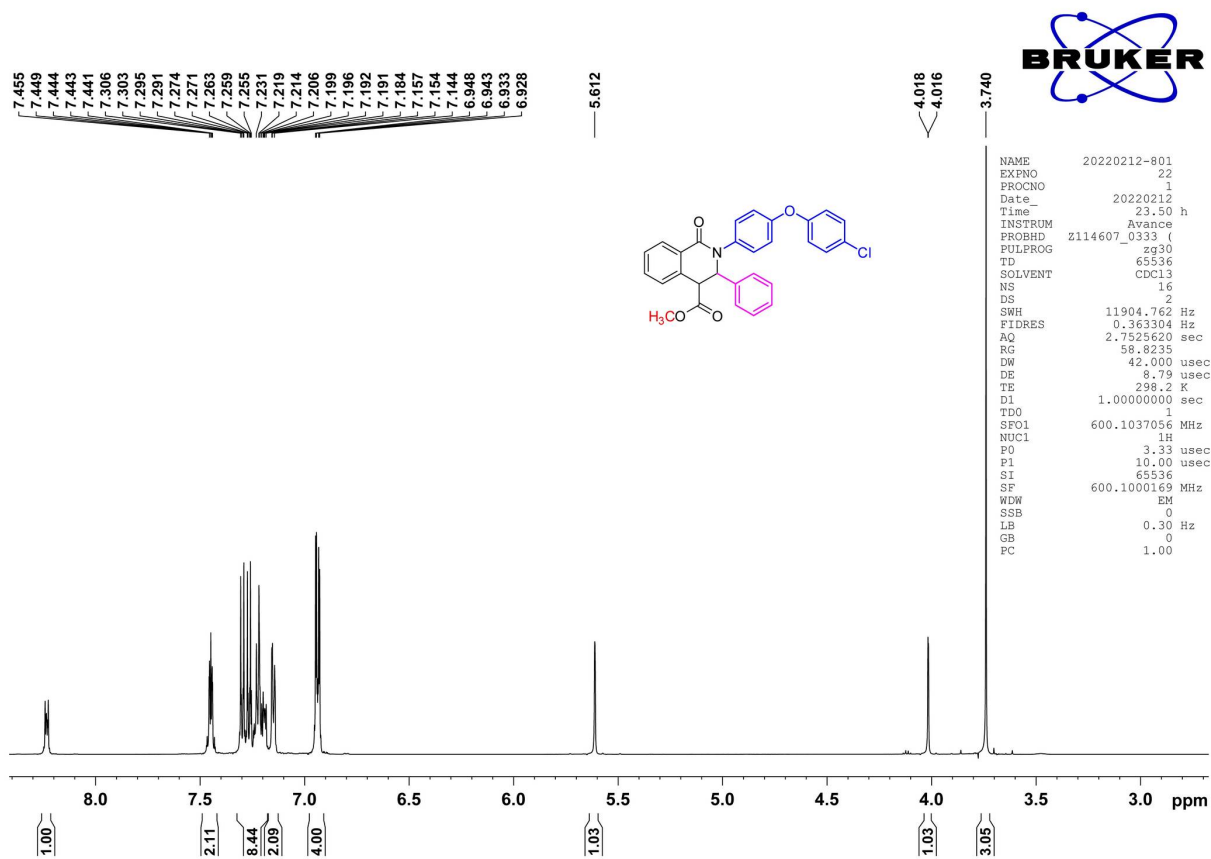

Figure S115. The  $^1\text{H}$  NMR spectrum of compound III1

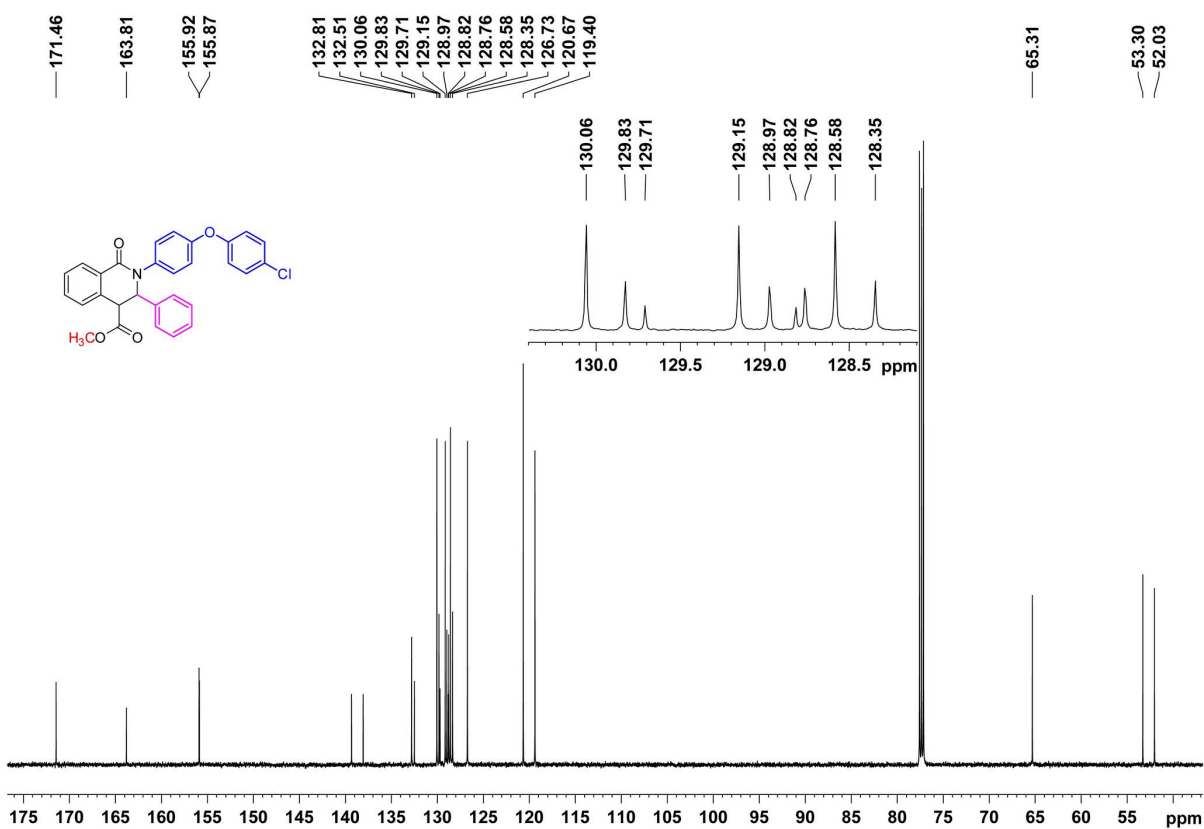

Figure S116. The  $^{13}\text{C}$  NMR spectrum of compound III1



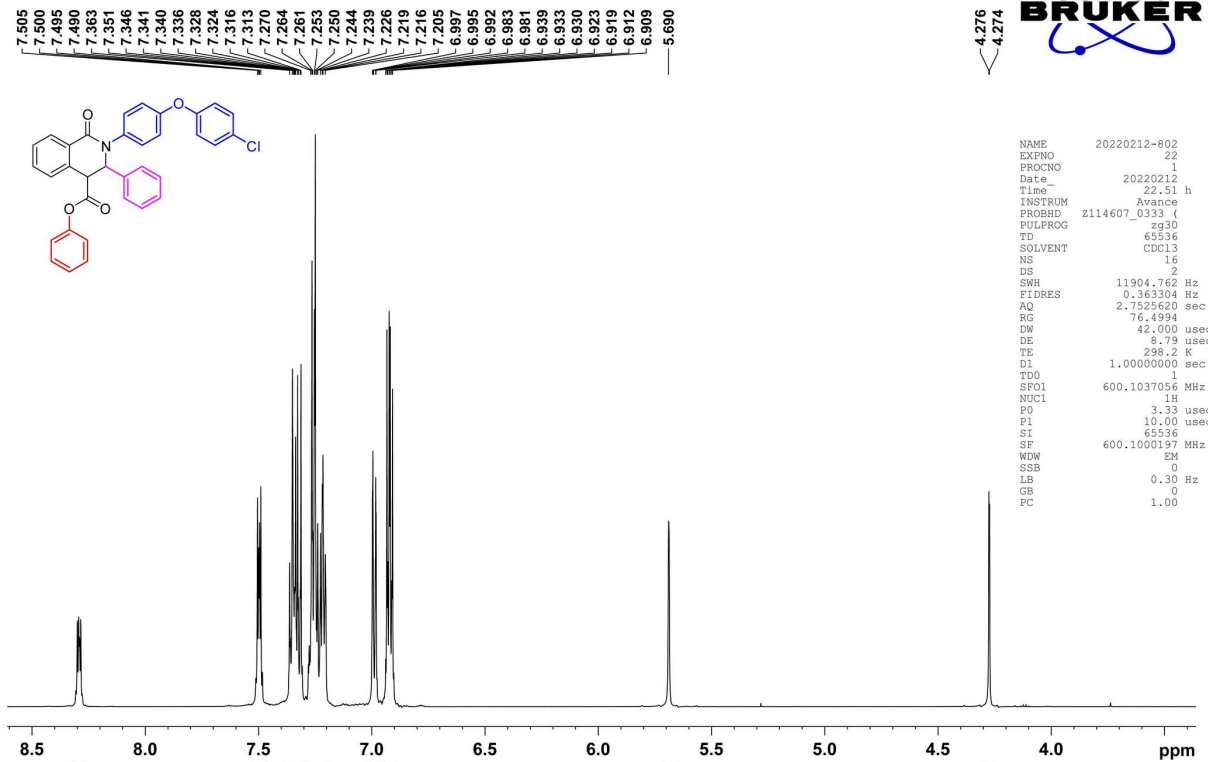

Figure S117. The  $^1\text{H}$  NMR spectrum of compound III2

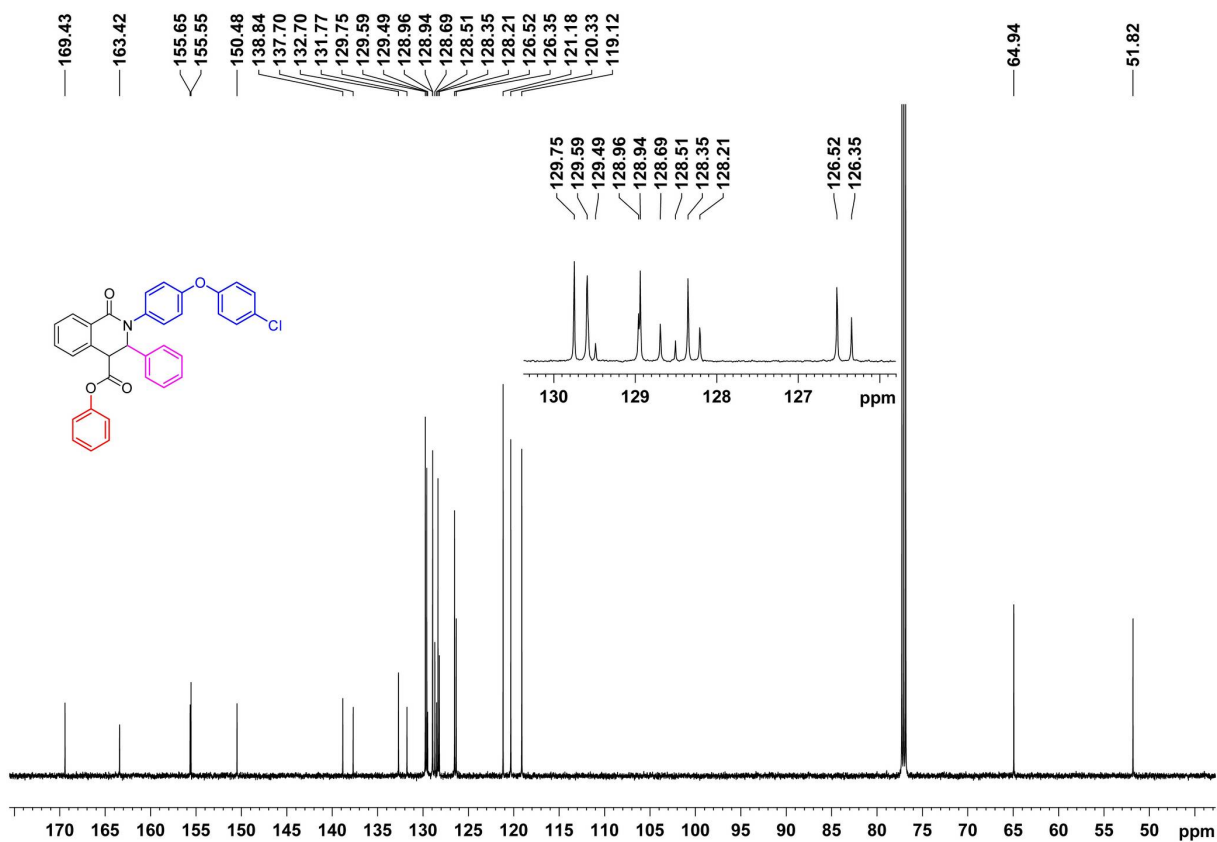

Figure S118. The  $^{13}\text{C}$  NMR spectrum of compound III2

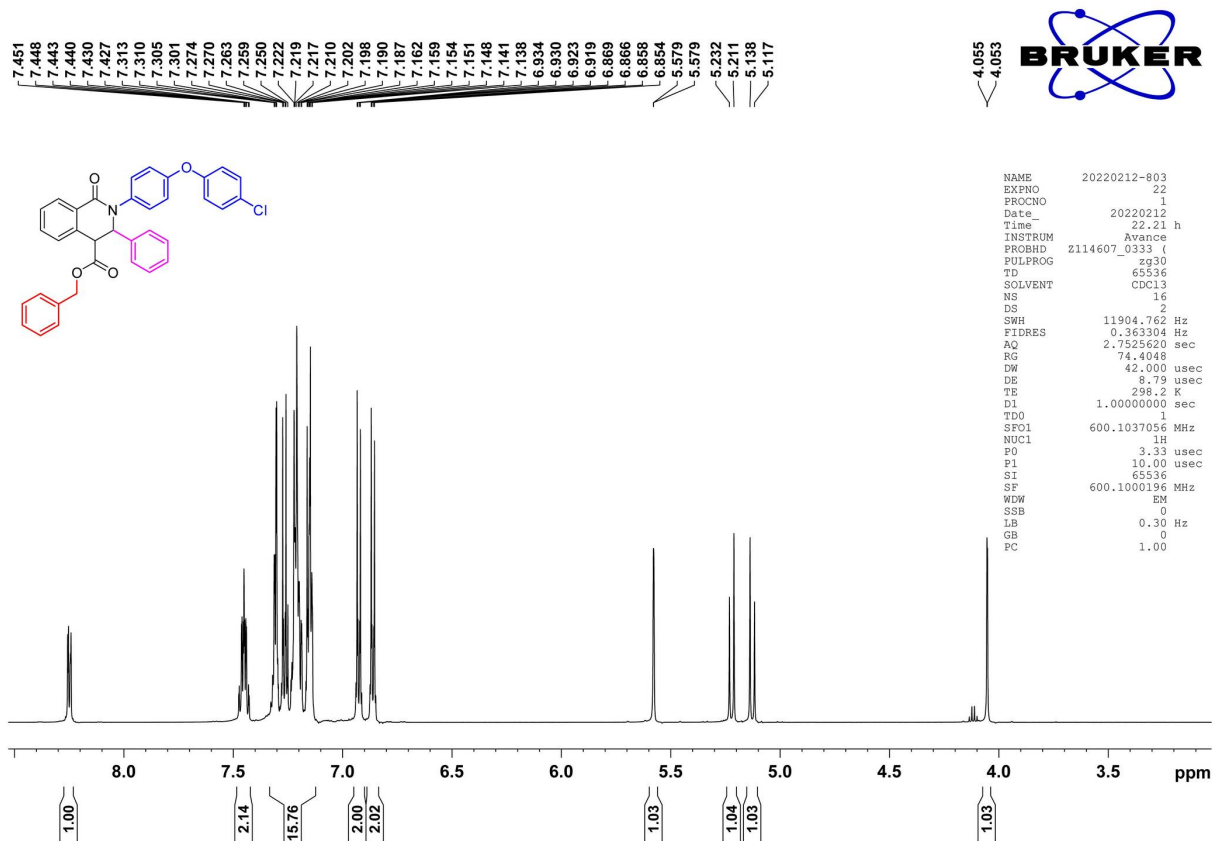

Figure S119. The  $^1\text{H}$  NMR spectrum of compound III3

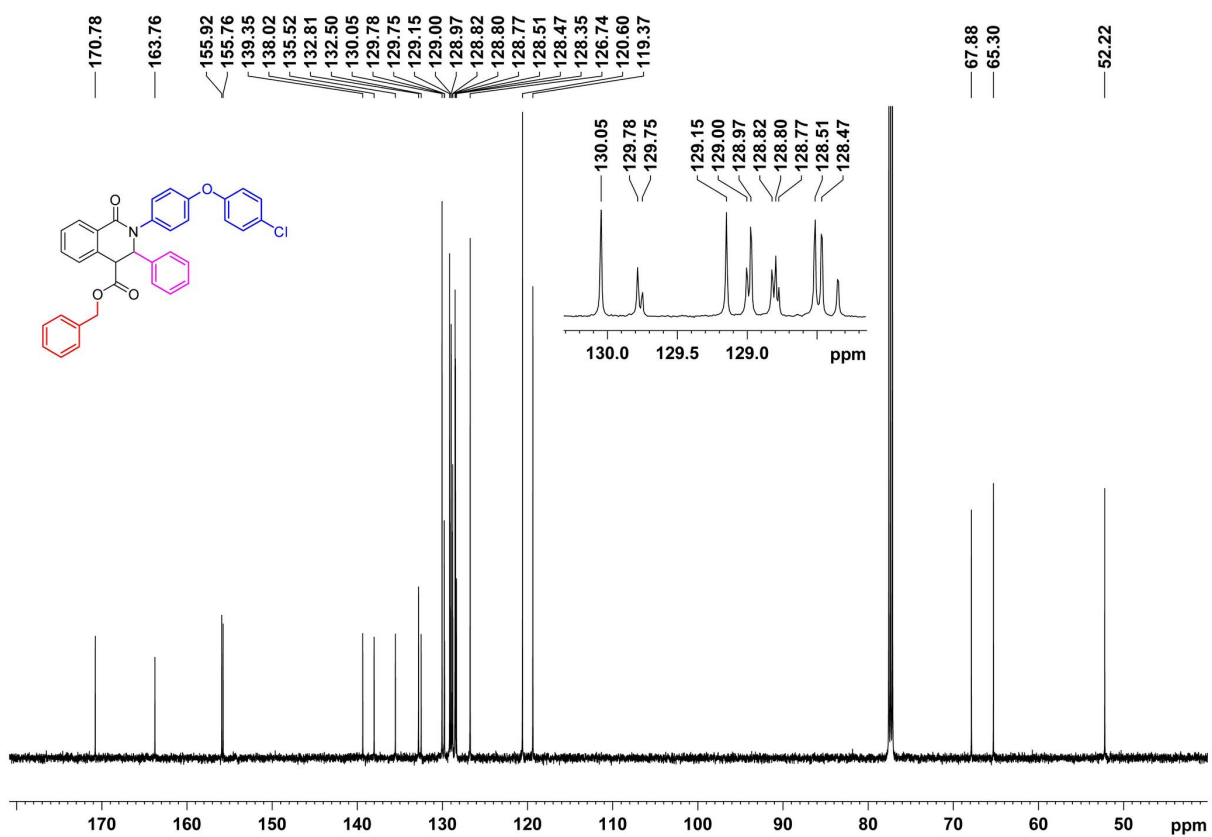

Figure S120. The  $^{13}\text{C}$  NMR spectrum of compound III3

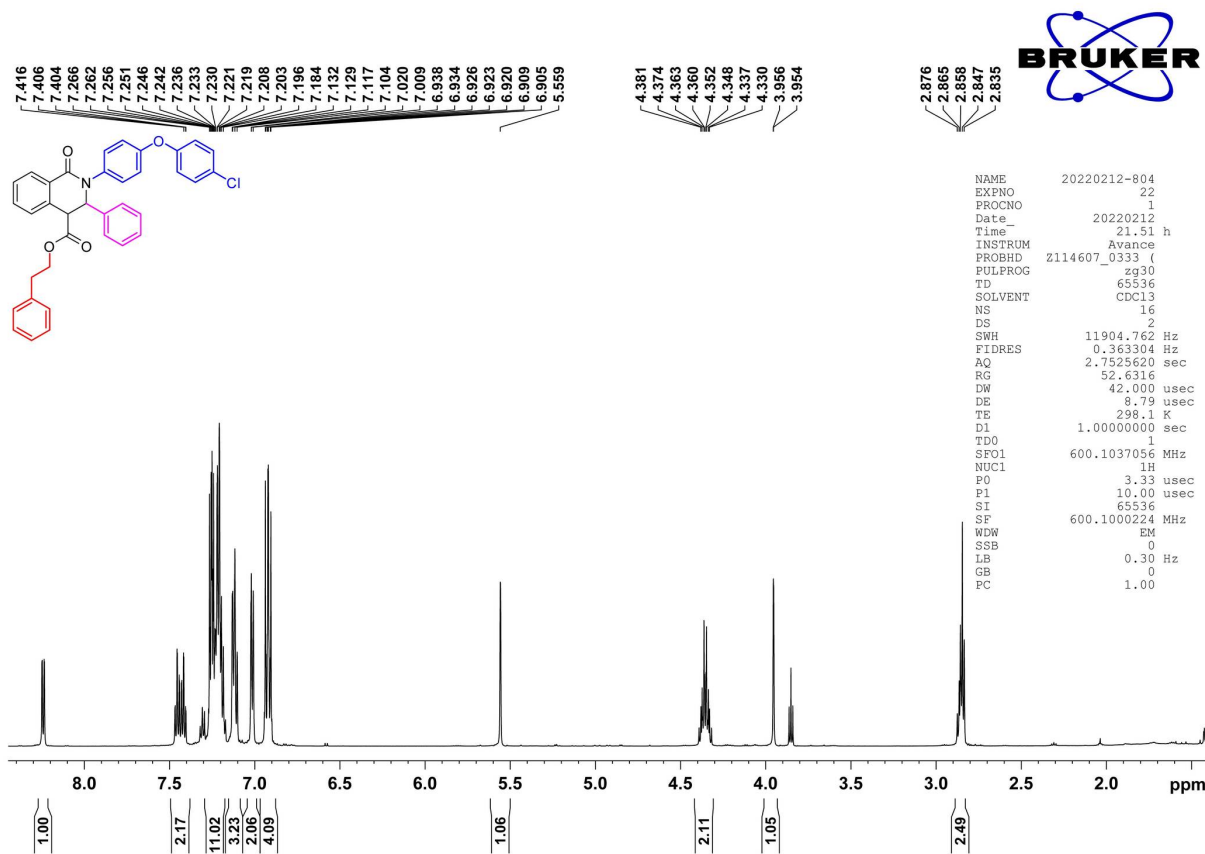

Figure S121. The <sup>1</sup>H NMR spectrum of compound III4

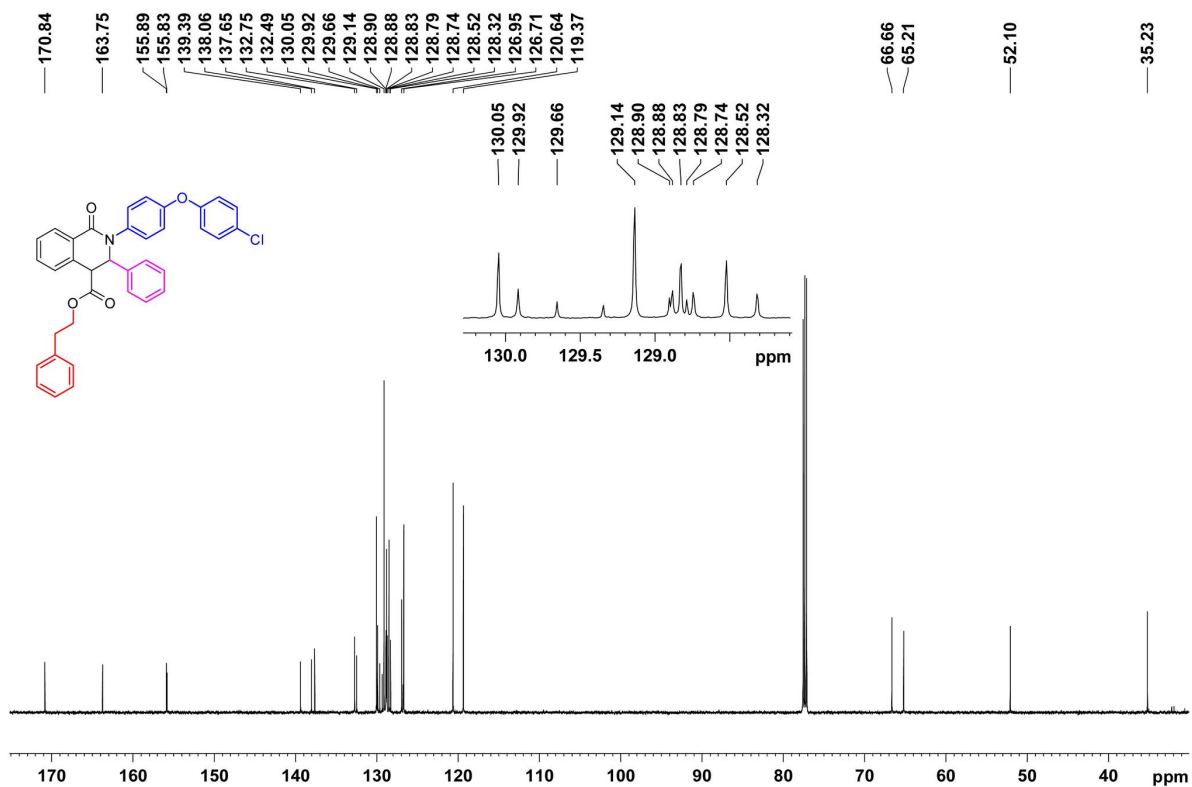

Figure S122. The <sup>13</sup>C NMR spectrum of compound III4

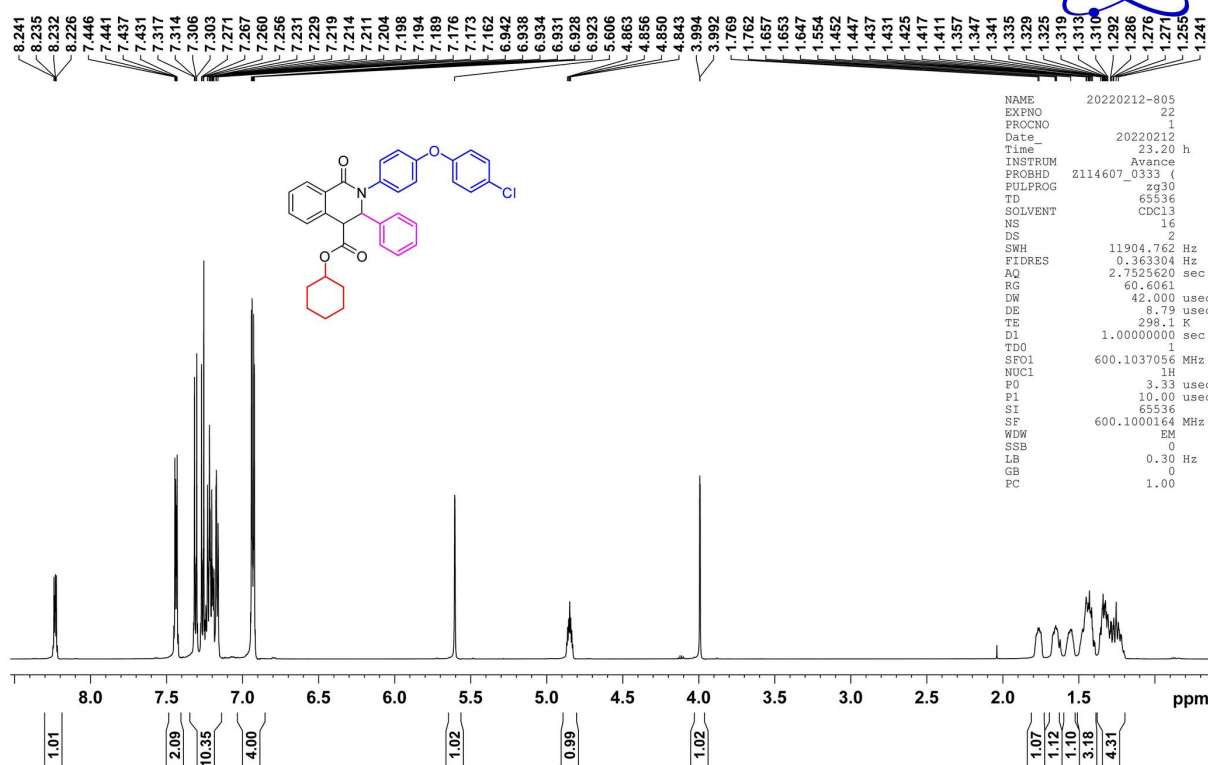

Figure S123. The  $^1\text{H}$  NMR spectrum of compound III5

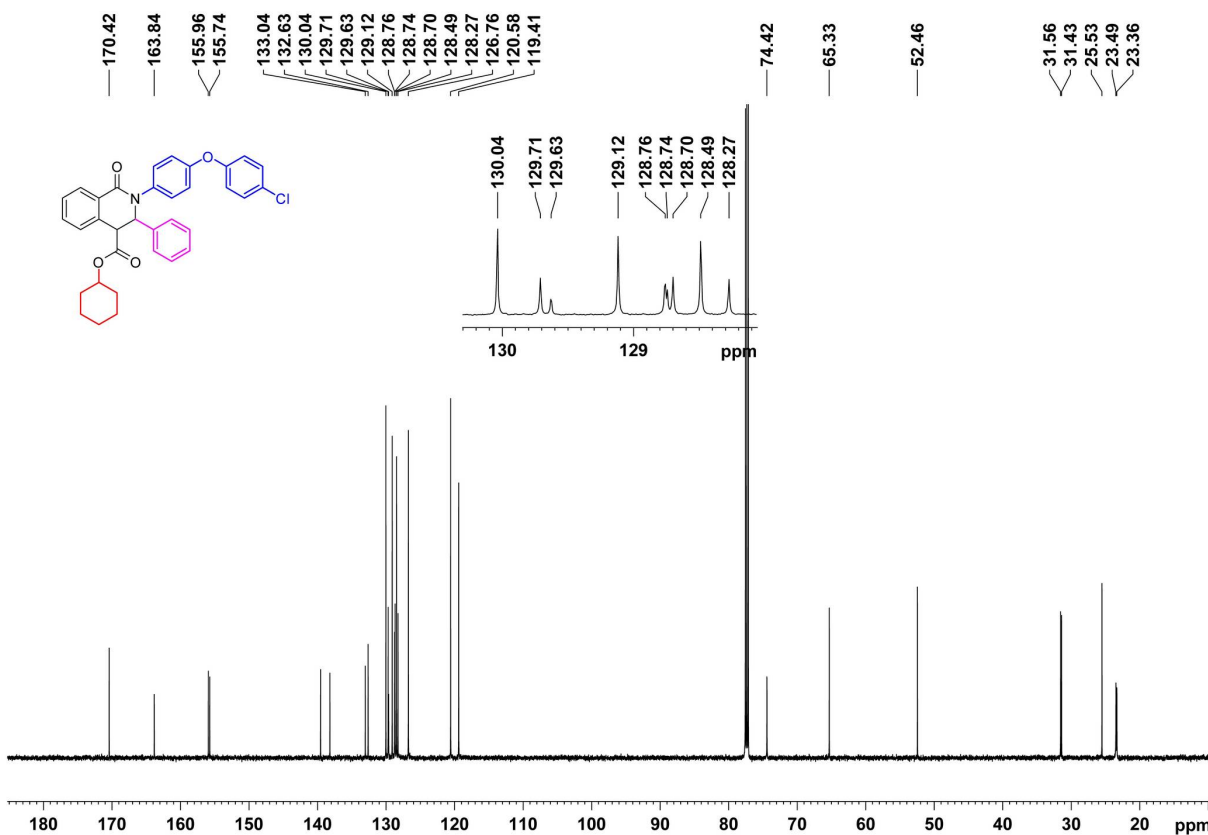

Figure S124. The  $^{13}\text{C}$  NMR spectrum of compound III5
